# Supplementary material for: Nickel-catalyzed enantioselective vinylation of aryl 2-azaallyl anions
Source: Royal Society of Chemistry journal article supplement (doi:10.1039/d1sc00972a), 2021-01-01
Supplement: d1sc00972a1.pdf [file d1sc00972a1.pdf]

## Electronic Supplementary Information (ESI)

### Nickel-Catalyzed Enantioselective Vinylation of Aryl 2-Azaallyl Anions

Shengzu Duan,<sup>†a</sup> Guogang Deng,<sup>†a</sup> Yujin Zi,<sup>a</sup> Xiaomei Wu,<sup>a</sup> Xun Tian,<sup>a</sup> Zhengfen Liu,<sup>a</sup> Minyan Li,<sup>\*b</sup> Hongbin Zhang,<sup>\*a</sup> Xiaodong Yang<sup>\*a</sup> & Patrick J. Walsh<sup>\*b</sup>

<sup>a</sup> Key Laboratory of Medicinal Chemistry for Natural Resource, Ministry of Education; Yunnan Provincial Center for Research & Development of Natural Products; School of Chemical Science and Technology, Yunnan University, Kunming, 650091, P. R. China. \*e-mail: xdyang@ynu.edu.cn; zhanghb@ynu.edu.cn

<sup>b</sup> Roy and Diana Vagelos Laboratories, Penn/Merck Laboratory for High-Throughput Experimentation, Department of Chemistry, University of Pennsylvania, 231 South 34th Street, Philadelphia, Pennsylvania, 19104, USA. \*e-mail: pwalsh@sas.upenn.edu; liminyan@sas.upenn.edu

<sup>†</sup>S. D. & G. D. contributed equally.

## TABLE OF CONTENT

|                                                                                                                                                                                                                |     |
|----------------------------------------------------------------------------------------------------------------------------------------------------------------------------------------------------------------|-----|
| 1. General methods.....                                                                                                                                                                                        | S2  |
| 2. Preparation of imines.....                                                                                                                                                                                  | S3  |
| 3. Preparation of alkenyl bromides.....                                                                                                                                                                        | S5  |
| 4. Ni-catalyzed asymmetric alkenylation of imines (Table 1): <i>Lab scale reaction optimization of Chiral ligands, solvents, bases, ratio of Ni : ligand and switching from Ni to Pd as metal source</i> ..... | S7  |
| 5. General procedure and characterization of Ni-catalyzed asymmetric alkenylation of imines with alkenyl bromides (Tables 2 and 3) .....                                                                       | S11 |
| 6. Gram-scale sequential one-pot asymmetric imine synthesis/vinylation procedure.....                                                                                                                          | S22 |
| 7. Transformation of the products.....                                                                                                                                                                         | S23 |
| 8. Reaction time course study of coupling between <b>1n</b> and <b>2a</b> (Table S6).....                                                                                                                      | S25 |
| 9. X-ray crystal structure of compound <b>4ka</b> .....                                                                                                                                                        | S26 |
| 10. Supplementary references.....                                                                                                                                                                              | S28 |
| 11. NMR spectra and HPLC chromatography of the products.....                                                                                                                                                   | S29 |

## 1. General methods.

All air- and moisture-sensitive solutions and chemicals were handled under a nitrogen atmosphere of a glovebox and solutions were transferred via “Titan” brand pipettor. Anhydrous solvents, including DME (dimethoxyethane), CPME (cyclopentyl methyl ether), MTBE (methyl *tert*-butyl ether), toluene, tetrahydrofuran (THF), cyclohexane, Et<sub>2</sub>O (diethyl ether) and 1,4-dioxane were purchased from Sigma-Aldrich and used without purification. Unless otherwise stated, all reagents were commercially available and used as received without purification. Ni(COD)<sub>2</sub> was purchased from Sigma-Aldrich and used as received. Chiral ligands were purchased from TCI and J&K. Other chemicals were obtained from Sigma-Aldrich, Acros, TCI and Alfa-Aesar. TLC was performed with Merck TLC Silica gel60 F<sub>254</sub> plates with detection under UV light at 254 nm. Silica gel (200-300 mesh, Qingdao) was used for flash chromatography. Deactivated silica gel was prepared by addition of 15 mL Et<sub>3</sub>N to 1 L of silica gel. The products were purified with XDB-C<sub>18</sub> (9.4 × 250 mm, 5 μm) column on an Agilent HPLC 1260 system. <sup>1</sup>H and <sup>13</sup>C{<sup>1</sup>H} NMR spectra were obtained using a Bruker DRX 400 spectrometer at 400 MHz and 100 MHz, respectively. Chemical shifts were reported in units of parts per million (ppm) downfield from tetramethylsilane (TMS), and all coupling constants were reported in hertz. The infrared (IR) spectra were measured on a Nicolet iS10 FTIR spectrometer with 4 cm<sup>-1</sup> resolution and 32 scans between wavenumber of 4000 cm<sup>-1</sup> and 400 cm<sup>-1</sup>. High Resolution Mass spectra were taken on AB QSTAR Pulsar mass spectrometer. Melting points were obtained on a XT-4 melting-point apparatus and were uncorrected. The enantiomeric excess was determined by chiral phase HPLC with *n*-hexane and *i*-propanol as eluents. Optical rotations were measured on a JASCO DIP-370 polarimeter at the indicated temperature (20 °C) with a sodium lamp (D line, 589 nm).

## 2. Preparation of imines

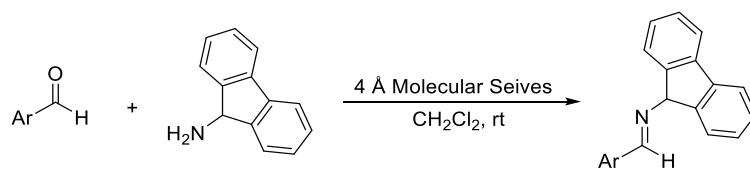

*N*-fluorenyl imines (**1a**, **1b**, **1d**, **1e** and **1n**) were prepared following reported procedures.<sup>[1,2]</sup>

To a solution of an aldehyde and 9*H*-fluoren-9-amine (1:1 mixture) in CH<sub>2</sub>Cl<sub>2</sub> (0.2 M) at room temperature was added 4 Å molecular sieves (0.3 g/mmol). The mixture was stirred at room temperature until completion (ca. 12 h), as indicated by <sup>1</sup>H NMR, and filtered. The filtrate was concentrated and triturated with hexanes to give the corresponding *N*-fluorenyl imines as a solid that is sufficiently pure for further reactions.

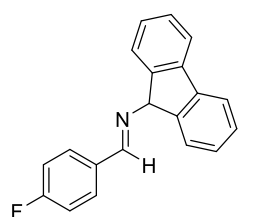

**(*E*)-*N*-(9*H*-Fluoren-9-yl)-1-(4-fluorophenyl)methanimine (**1c**).** <sup>1</sup>H NMR (400 MHz, Chloroform-*d*) δ 8.64 (s, 1H), 7.73 – 7.66 (m, 4H), 7.34 – 7.29 (m, 4H), 7.21 (td, *J* = 7.2, 1.2 Hz, 2H), 7.00 (t, *J* = 8.4 Hz, 2H), 5.32 (s, 1H) ppm; <sup>13</sup>C{<sup>1</sup>H} NMR (100 MHz, Chloroform-*d*) δ 164.6 (d, <sup>1</sup>*J*<sub>C-F</sub> = 249.7 Hz), 162.0, 144.8, 141.2, 132.5 (d, <sup>4</sup>*J*<sub>C-F</sub> = 3.1 Hz), 130.6 (d, <sup>3</sup>*J*<sub>C-F</sub> = 8.7 Hz), 128.6, 127.6, 125.4, 120.3, 115.8 (d, <sup>2</sup>*J*<sub>C-F</sub> = 22.0 Hz), 74.7 ppm; **IR** (thin film): 3357, 3057, 2878, 1628, 1448, 1227, 1040, 816, 727 cm<sup>-1</sup>; <sup>19</sup>F NMR (376 MHz, Chloroform-*d*) δ -108.9 (s, 1F). **HRMS** calc'd for C<sub>20</sub>H<sub>15</sub>FN<sup>+</sup> 288.1183, found 288.1176 [M+H]<sup>+</sup>. **Mp**: 138 – 140 °C.

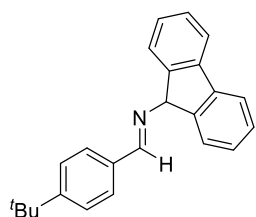

**(*E*)-1-(4-(*tert*-Butyl)phenyl)-*N*-(9*H*-fluoren-9-yl)methanimine (**1f**).** <sup>1</sup>H NMR (400 MHz, Chloroform-*d*) δ 8.68 (s, 1H), 7.70 – 7.66 (m, 4H), 7.37 – 7.28 (m, 6H), 7.22 – 7.19 (m, 2H), 5.31 (d, *J* = 2.4 Hz 1H), 1.25 (s, 9H) ppm; <sup>13</sup>C{<sup>1</sup>H} NMR (100 MHz, Chloroform-*d*) δ 163.5, 154.6, 145.1, 141.2, 133.5, 128.5, 127.5, 125.7, 125.4, 120.2, 75.0, 35.1, 31.3 ppm, one resonance was not observed due to overlapping peaks; **IR** (thin film): 3390, 3064, 2850, 1633, 1450, 1233, 1044, 802, 743 cm<sup>-1</sup>; **HRMS** calc'd for C<sub>24</sub>H<sub>24</sub>N<sup>+</sup> 326.1903, found 326.1901 [M+H]<sup>+</sup>. **Mp**: 124 – 126 °C.

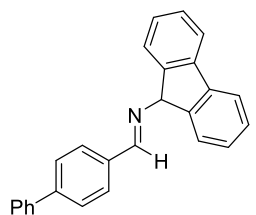

**(*E*)-1-([1,1'-Biphenyl]-4-yl)-*N*-(9*H*-fluoren-9-yl)methanimine (**1g**).** <sup>1</sup>H NMR (400 MHz, Chloroform-*d*) δ 8.72 (s, 1H), 7.81 – 7.78 (m, 2H), 7.69 – 7.66 (m, 2H), 7.57 – 7.50 (m, 4H), 7.37 – 7.19 (m, 9H), 5.35 (s, 1H) ppm; <sup>13</sup>C{<sup>1</sup>H} NMR (100 MHz, Chloroform-*d*) δ 163.2, 144.9, 143.8, 141.2, 140.5, 135.1, 129.1, 129.0, 128.6, 127.9, 127.6, 127.4, 127.3, 125.4, 120.3, 74.9 ppm; **IR** (thin film): 3363, 3057, 2920, 1627, 1448, 1226, 1040, 833, 740 cm<sup>-1</sup>; **HRMS** calc'd for C<sub>26</sub>H<sub>20</sub>N<sup>+</sup> 346.1590, found 346.1590 [M+H]<sup>+</sup>. **Mp**: 171 – 173 °C.

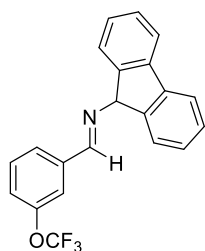

**(*E*)-*N*-(9*H*-Fluoren-9-yl)-1-(3-(trifluoromethoxy)phenyl)methanimine (**1h**).** <sup>1</sup>H NMR (400 MHz, Chloroform-*d*) δ 8.56 (s, 1H), 7.63 (d, *J* = 7.6 Hz, 2H), 7.56 (d, *J* = 8.0 Hz, 2H), 7.30 – 7.23 (m, 5H), 7.19 – 7.12 (m, 3H), 5.29 (s, 1H) ppm; <sup>13</sup>C{<sup>1</sup>H} NMR (100 MHz, Chloroform-*d*) δ 161.7, 149.7, 144.5, 141.1, 138.2, 130.1, 128.7, 127.6, 127.0, 125.4, 123.3, 120.6 (q, *J*<sub>C-F</sub> = 256.1 Hz), 120.7, 120.3, 74.5 ppm; <sup>19</sup>F NMR (376 MHz, Chloroform-*d*) δ -57.6 (s, 3F). **IR** (thin film): 3068,

2987, 2853, 1639, 1450, 1166, 1002, 932, 841, 730, 684  $\text{cm}^{-1}$ ; **HRMS** calc'd for  $\text{C}_{21}\text{H}_{15}\text{F}_3\text{NO}^+$  354.1100, found 354.1100  $[\text{M}+\text{H}]^+$ . **Mp**: 73 – 75 °C.

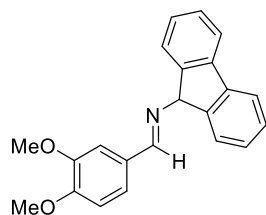

**(E)-1-(3,4-Dimethoxyphenyl)-N-(9H-fluoren-9-yl)methanimine (1i).**  $^1\text{H}$  NMR (400 MHz, Chloroform-*d*)  $\delta$  8.58 (s, 1H), 7.67 (s, 1H), 7.66 – 7.65 (m, 1H), 7.38 (s, 1H), 7.33 – 7.29 (m, 4H), 7.23 – 7.15 (m, 3H), 6.80 (t,  $J$  = 8.0 Hz, 1H), 5.30 (s, 1H), 3.82 (s, 3H), 3.77 (s, 3H) ppm;  $^{13}\text{C}\{^1\text{H}\}$  NMR (100 MHz, Chloroform-*d*)  $\delta$  163.1, 151.7, 149.5, 145.1, 141.1, 129.5, 128.5, 127.5, 125.4, 123.6, 120.2, 110.5, 109.4, 74.8, 56.14, 56.07 ppm; **IR** (thin film): 3395, 3065, 2837, 1682, 1420, 1239, 1025, 877, 739  $\text{cm}^{-1}$ ; **HRMS** calc'd for  $\text{C}_{22}\text{H}_{20}\text{NO}_2^+$  330.1489, found 330.1488  $[\text{M}+\text{H}]^+$ . **Mp**: 154 – 156 °C.

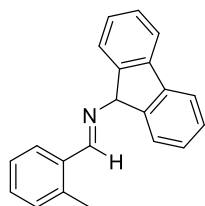

**(E)-N-(9H-Fluoren-9-yl)-1-(o-tolyl)methanimine (1j).**  $^1\text{H}$  NMR (400 MHz, Chloroform-*d*)  $\delta$  8.97 (s, 1H), 7.81 (dd,  $J$  = 7.6, 4.0 Hz, 1H), 7.63 (dd,  $J$  = 8.4, 2.8 Hz, 2H), 7.30 – 7.26 (m, 4H), 7.20 – 7.15 (m, 3H), 7.08 (d,  $J$  = 7.6 Hz, 2H), 5.28 (s, 1H), 2.46 (s, 3H) ppm;  $^{13}\text{C}\{^1\text{H}\}$  NMR (100 MHz, Chloroform-*d*)  $\delta$  162.1, 145.0, 141.1, 137.8, 134.2, 130.9, 130.6, 128.5, 128.1, 127.5, 126.3, 125.3, 120.2, 75.3, 19.5 ppm; **IR** (thin film): 3065, 2872, 1630, 1450, 1226, 1157, 1006, 740  $\text{cm}^{-1}$ ; **HRMS** calc'd for  $\text{C}_{21}\text{H}_{18}\text{N}^+$  284.1434, found 284.1433  $[\text{M}+\text{H}]^+$ . **Mp**: 127 – 129 °C.

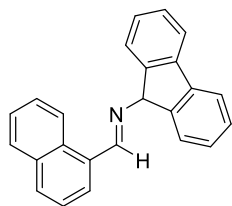

**(E)-N-(9H-Fluoren-9-yl)-1-(naphthalen-1-yl)methanimine (1k).**  $^1\text{H}$  NMR (400 MHz, Chloroform-*d*)  $\delta$  9.35 (s, 1H), 8.81 (d,  $J$  = 7.6 Hz, 1H), 7.90 (dd,  $J$  = 7.2, 1.2 Hz, 1H), 7.83 (d,  $J$  = 8.4 Hz, 1H), 7.79 (dd,  $J$  = 8.4, 1.2 Hz, 1H), 7.69 (d,  $J$  = 7.6 Hz, 2H), 7.47 – 7.31 (m, 7H), 7.22 (td,  $J$  = 7.6, 1.2 Hz, 2H), 5.42 (s, 1H) ppm;  $^{13}\text{C}\{^1\text{H}\}$  NMR (100 MHz, Chloroform-*d*)  $\delta$  163.1, 145.1, 141.2, 133.9, 131.6, 131.5, 129.3, 128.8, 128.6, 127.6, 127.4, 126.2, 125.4, 125.4, 124.5, 120.3, 75.7 ppm, one resonance was not observed due to overlapping peaks; **IR** (thin film): 3383, 3063, 2865, 1682, 1421, 1166, 1018, 742  $\text{cm}^{-1}$ ; **HRMS** calc'd for  $\text{C}_{24}\text{H}_{18}\text{N}^+$  320.1434, found 320.1433  $[\text{M}+\text{H}]^+$ . **Mp**: 146 – 148 °C.

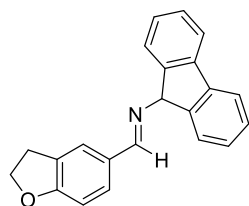

**(E)-1-(2,3-Dihydrobenzofuran-5-yl)-N-(9H-fluoren-9-yl)methanimine (1l).**  $^1\text{H}$  NMR (400 MHz, Chloroform-*d*)  $\delta$  8.59 (s, 1H), 7.67 (t,  $J$  = 8.4 Hz, 3H), 7.41 (dd,  $J$  = 8.0, 1.6 Hz, 1H), 7.32 – 7.29 (m, 4H), 7.20 (td,  $J$  = 7.6, 1.2 Hz, 2H), 6.72 (d,  $J$  = 8.4 Hz, 1H), 5.27 (s, 1H), 4.49 (t,  $J$  = 8.4 Hz, 2H), 3.06 (t,  $J$  = 8.4 Hz, 2H) ppm;  $^{13}\text{C}\{^1\text{H}\}$  NMR (100 MHz, Chloroform-*d*)  $\delta$  163.2, 162.9, 145.2, 141.1, 130.6, 129.2, 128.5, 128.1, 127.5, 125.3, 124.6, 120.2, 109.2, 74.7, 72.0, 29.2 ppm; **IR** (thin film): 3359, 3057, 2919, 1627, 1447, 1003, 833, 741, 659  $\text{cm}^{-1}$ ; **HRMS** calc'd for  $\text{C}_{22}\text{H}_{18}\text{NO}^+$  312.1383, found 312.1387  $[\text{M}+\text{H}]^+$ . **Mp**: 125 – 127 °C.

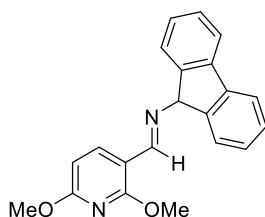

**(E)-1-(2,6-Dimethoxy-pyridin-3-yl)-N-(9H-fluoren-9-yl)methanimine (1m).**  $^1\text{H}$  NMR (400 MHz, Chloroform-*d*)  $\delta$  8.93 (s, 1H), 8.07 (dd,  $J$  = 8.0, 1.2 Hz, 1H), 7.61 (dd,  $J$  = 7.2, 1.2 Hz, 2H), 7.25 (t,  $J$  = 7.2 Hz, 4H), 7.16 (td,  $J$  = 7.2, 1.2 Hz, 2H), 6.18 (d,  $J$  = 8.4 Hz, 1H), 5.23 (s, 1H), 3.91 (s, 3H), 3.81 (s, 3H) ppm;  $^{13}\text{C}\{^1\text{H}\}$  NMR (100 MHz, Chloroform-*d*)  $\delta$  164.9, 161.8, 158.3,

145.2, 141.0, 139.4, 128.4, 127.4, 125.3, 120.1, 110.8, 102.5, 75.2, 53.8, 53.6 ppm; **IR** (thin film): 3354, 3016, 2866, 1678, 1484, 1155, 1018, 765 cm<sup>-1</sup>; **HRMS** calc'd for C<sub>21</sub>H<sub>19</sub>N<sub>2</sub>O<sub>2</sub><sup>+</sup> 331.1441, found 331.1442 [M+H]<sup>+</sup>. **Mp**: 119 – 121 °C.

### 3. Preparation of alkenyl bromides

Compounds **2a-2d** were purchased from Sigma-Aldrich and directly used. Alkenyl bromides **2e-2h** were prepared according to literature procedures.<sup>[3]</sup>

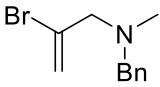 **N-Benzyl-2-bromo-N-methylprop-2-en-1-amine (2e).** The reaction was performed following the literature procedures.<sup>[3]</sup> Under an air atmosphere, to 2,3-dibromoprop-1-ene (500 mg, 2.5 mmol, 1 equiv) in THF (8.3 mL, 0.3 M) was added *N*-methyl-1-phenylmethanamine (646 μL, 5 mmol, 2 equiv) via syringe at room temperature. The reaction mixture was heated to 35 °C and stirred for 4 h. Once the reaction was complete, H<sub>2</sub>O (25 mL) was added and the organics were extracted with CH<sub>2</sub>Cl<sub>2</sub> (25 mL). The combined organics were dried over Na<sub>2</sub>SO<sub>4</sub>, filtered, and concentrated under vacuum. The crude residue was purified by column chromatography (silica gel, 20% to 50% EtOAc in petroleum ether) to afford the title compound as a clear oil (479 mg, 80%). The <sup>1</sup>H and <sup>13</sup>C{<sup>1</sup>H} data for this compound match the literature data.<sup>[3]</sup>

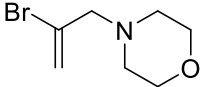 **4-(2-Bromoallyl)morpholine (2f).** The reaction was performed following the literature procedures.<sup>[3]</sup> Under an air atmosphere, to 2,3-dibromoprop-1-ene (500 mg, 2.5 mmol, 1 equiv) in THF (8.3 mL, 0.3 M) was added morpholine (432 μL, 5 mmol, 2 equiv) via syringe at room temperature. The reaction mixture was stirred at room temperature for 24 h. Once the reaction was complete, H<sub>2</sub>O (25 mL) was added and the organics were extracted with CH<sub>2</sub>Cl<sub>2</sub> (25 mL). The combined organics were dried over Na<sub>2</sub>SO<sub>4</sub>, filtered, and concentrated under vacuum. The crude residue was purified by column chromatography (silica gel, 20-80% EtOAc in petroleum ether) to afford the title compound as a clear oil (368 mg, 71%). The <sup>1</sup>H and <sup>13</sup>C{<sup>1</sup>H} data for this compound match the literature data.<sup>[3]</sup>

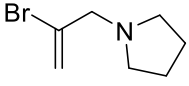 **1-(2-Bromoallyl)pyrrolidine (2g).** The reaction was performed following the literature procedures.<sup>[3]</sup> Under an air atmosphere, to 2,3-dibromoprop-1-ene (500 mg, 2.5 mmol, 1 equiv) in THF (8.3 mL, 0.3 M) was added pyrrolidine (411 μL, 5 mmol, 2 equiv) via syringe at room temperature. The reaction mixture was heated to 40 °C and stirred for 24 h. Once the reaction was complete, it was cooled to room temperature and H<sub>2</sub>O (25 mL) was added and the organics were extracted with CH<sub>2</sub>Cl<sub>2</sub> (25 mL). The combined organics were dried over Na<sub>2</sub>SO<sub>4</sub>, filtered, and concentrated under vacuum. The crude residue was purified by column chromatography (silica gel, 20-50% EtOAc in petroleum ether) to afford the title compound as a clear oil (404 mg, 85%). **<sup>1</sup>H NMR** (400 MHz, Chloroform-*d*) δ 5.76 (dd, *J* = 4.4, 1.2 Hz, 1H), 5.45 (d, *J* = 5.6 Hz, 1H), 3.23 (d, *J* = 6.4 Hz, 2H), 2.50 – 2.46 (m, 4H), 1.77 – 1.70 (m, 4H) ppm; **<sup>13</sup>C{<sup>1</sup>H} NMR** (100 MHz, Chloroform-*d*) δ 31.6, 117.6, 64.5, 53.7, 23.6 ppm; **IR** (thin film): 2966, 2790, 1631, 1431, 1125, 891, 583 cm<sup>-1</sup>; **HRMS** calc'd for C<sub>7</sub>H<sub>13</sub>BrN<sup>+</sup> 190.0226, found 190.0229 [M+H]<sup>+</sup>.

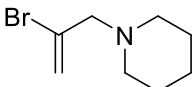 **1-(2-Bromoallyl)piperidine (2h).** The reaction was performed following the literature procedures.<sup>[3]</sup> Under an air atmosphere, to 2,3-dibromoprop-1-ene (500 mg, 2.5 mmol, 1 equiv) in THF (8.3 mL, 0.3 M) was added piperidine (501 μL, 5 mmol, 2 equiv) via syringe at room temperature. The reaction mixture was heated to 40 °C for 24 h with

stirring. Once the reaction was complete, it was cooled to room temperature and H<sub>2</sub>O (25 mL) was added and the organics were extracted with CH<sub>2</sub>Cl<sub>2</sub> (25 mL). The combined organics were dried over Na<sub>2</sub>SO<sub>4</sub>, filtered, and concentrated under vacuum. The crude residue was purified by column chromatography (silica gel, 20-50% EtOAc in petroleum ether) to afford the title compound as a clear oil (367 mg, 72%). **<sup>1</sup>H NMR** (400 MHz, Chloroform-*d*) δ 5.77 (d, *J* = 1.6 Hz, 1H), 5.48 (s, 1H), 3.07 (s, 2H), 2.34 (t, *J* = 5.2 Hz, 4H), 1.55 – 1.49 (m, 4H), 1.39 – 1.34 (m, 2H) ppm; **<sup>13</sup>C{<sup>1</sup>H} NMR** (100 MHz, Chloroform-*d*) δ 131.2, 118.0, 67.2, 54.2, 26.0, 24.3 ppm; **IR** (thin film): 2935, 2854, 2790, 1630, 1441, 1110, 891, 789, 569 cm<sup>-1</sup>; **HRMS** calc'd for C<sub>8</sub>H<sub>15</sub>BrN<sup>+</sup> 204.0382, found 204.0387 [M+H]<sup>+</sup>.

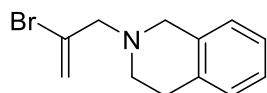

**2-(2-Bromoallyl)-1,2,3,4-tetrahydroisoquinoline (2i).** Under an air atmosphere, the 1,2,3,4-tetrahydroisoquinoline (313 μL, 2.5 mmol, 1 equiv) and K<sub>2</sub>CO<sub>3</sub> (1.04 g, 7.5 mmol, 5 equiv) were added to MeCN (22.5 mL, 0.1 M). Next, 2,3-dibromoprop-1-ene (999 mg, 5 mmol, 2 equiv) was added via syringe at room temperature. The reaction mixture was heated to 40 °C for 12 h. Once the reaction was complete, it was cooled to room temperature. H<sub>2</sub>O (25 mL) was added and the organics were extracted with CH<sub>2</sub>Cl<sub>2</sub> (25 mL). The combined organics were dried over Na<sub>2</sub>SO<sub>4</sub>, filtered, and concentrated under vacuum. The crude residue was purified by column chromatography (silica gel, 2-10% EtOAc in petroleum ether) to afford the title compound as a yellow oil (548 mg, 87%). **<sup>1</sup>H NMR** (400 MHz, Chloroform-*d*) δ 7.14 – 7.10 (m, 3H), 7.02 – 7.00 (m, 1H), 5.93 (d, *J* = 1.2 Hz, 1H), 5.63 (s, 1H), 3.69 (s, 2H), 3.37 (s, 2H), 2.92 (t, *J* = 6.0 Hz, 2H), 2.80 (t, *J* = 6.0 Hz, 2H) ppm; **<sup>13</sup>C{<sup>1</sup>H} NMR** (100 MHz, Chloroform-*d*) δ 134.6, 134.4, 130.8, 128.9, 126.7, 126.3, 125.8, 118.8, 66.1, 55.5, 50.3, 29.1 ppm; **IR** (thin film): 2921, 2803, 1631, 1450, 1093, 896, 741 cm<sup>-1</sup>; **HRMS** calc'd for C<sub>12</sub>H<sub>15</sub>BrN<sup>+</sup> 252.0382, found 252.0384 [M+H]<sup>+</sup>.

**4. Ni-catalyzed asymmetric alkenylation of imines (Table 1): Lab scale reaction optimization of chiral ligands, solvents, bases, ratio of Ni : ligand and switching from Ni to Pd as metal source**

**Table S1. Screening of chiral ligands for Ni-catalyzed asymmetric alkenylation<sup>a</sup>**

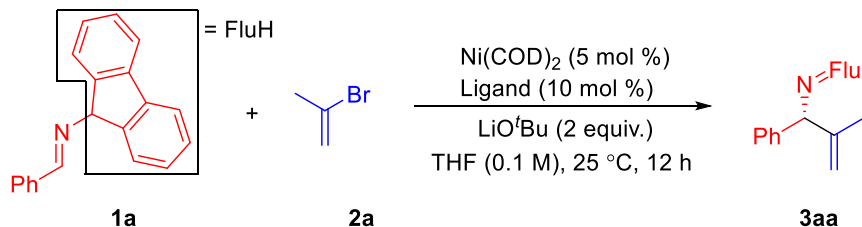

| entry | ligand     | CAS number   | yield of <b>3aa</b> (%) <sup>b</sup> | ee of <b>3aa</b> (%) <sup>c</sup> |
|-------|------------|--------------|--------------------------------------|-----------------------------------|
| 1     | <b>L1</b>  | 64896-28-2   | 65                                   | 78                                |
| 2     | <b>L2</b>  | 528565-79-9  | 52                                   | 47                                |
| 3     | <b>L3</b>  | 164858-79-1  | 47                                   | 55                                |
| 4     | <b>L4</b>  | 131457-46-0  | 66                                   | 0                                 |
| 5     | <b>L5</b>  | 176706-98-2  | 75                                   | 0                                 |
| 6     | <b>L6</b>  | 885701-78-0  | 34                                   | 45                                |
| 7     | <b>L7</b>  | 37002-48-5   | 70                                   | 0                                 |
| 8     | <b>L8</b>  | 503538-69-0  | 28                                   | 0                                 |
| 9     | <b>L9</b>  | 76189-55-4   | 77                                   | 0                                 |
| 10    | <b>L10</b> | 99646-28-3   | 82                                   | 0                                 |
| 11    | <b>L11</b> | 636559-55-2  | 33                                   | 0                                 |
| 12    | <b>L12</b> | 636559-56-3  | 55                                   | 0                                 |
| 13    | <b>L13</b> | 138517-61-0  | 5                                    | -                                 |
| 14    | <b>L14</b> | 1439556-82-7 | 91                                   | 0                                 |
| 15    | <b>L15</b> | 244261-66-3  | 90                                   | 0                                 |
| 16    | <b>L16</b> | 138517-62-1  | 7                                    | -                                 |
| 17    | <b>L17</b> | 301847-89-2  | 85                                   | 0                                 |
| 18    | <b>L18</b> | 136705-65-2  | 79                                   | 0                                 |
| 19    | <b>L19</b> | 934705-43-8  | 29                                   | 0                                 |
| 20    | <b>L20</b> | 712352-08-4  | 88                                   | 0                                 |
| 21    | <b>L21</b> | 157488-65-8  | 52                                   | 0                                 |
| 22    | <b>L22</b> | 349103-24-8  | 53                                   | 0                                 |
| 23    | <b>L23</b> | 1221902-06-2 | 61                                   | 0                                 |
| 24    | <b>L24</b> | 917377-74-3  | 66                                   | 0                                 |
| 25    | <b>L25</b> | 528521-87-1  | 71                                   | 0                                 |
| 26    | <b>L26</b> | 917377-75-4  | 59                                   | 0                                 |

<sup>a</sup>Reactions conducted on a 0.1 mmol scale using 1 equiv. of **1a**, and 3 equiv. of **2a**, Ni(COD)<sub>2</sub> (5 mol %), ligands (10 mol %) and LiO<sup>t</sup>Bu (2.0 equiv.) in 1 mL of THF at 25 °C for 12 h. <sup>b</sup>Isolated yield of **3aa** after chromatographic purification. <sup>c</sup>The ee (enantiomeric excess) of **3aa** was determined by chiral phase HPLC.

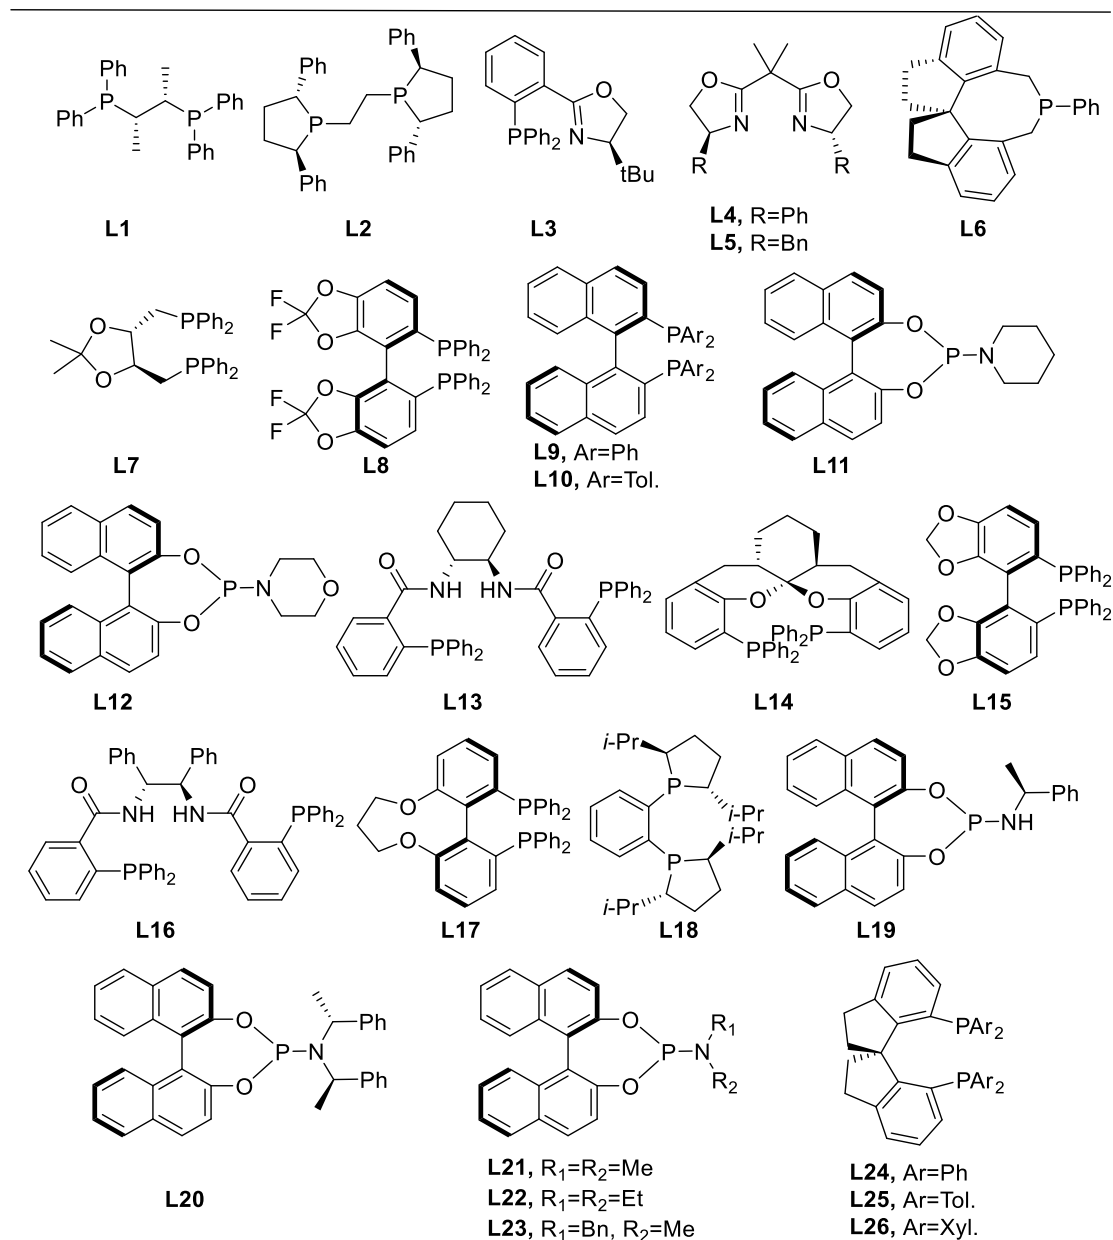

**Table S2. Screening of bases for Ni-catalyzed asymmetric alkenylation<sup>a</sup>**

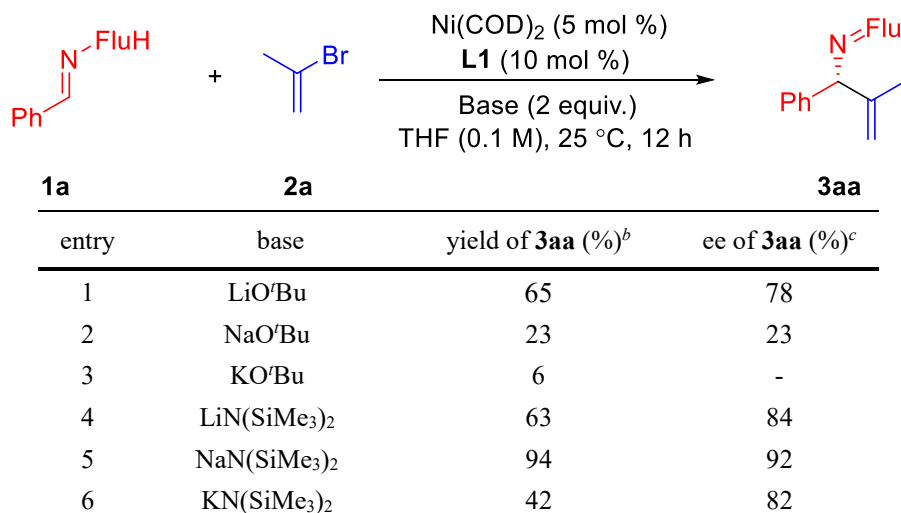



|    |                   |   |   |
|----|-------------------|---|---|
| 7  | Et <sub>3</sub> N | 0 | - |
| 8  | DBU               | 0 | - |
| 9  | TMG               | 0 | - |
| 10 | DABCO             | 0 | - |

<sup>a</sup>Reactions conducted on a 0.1 mmol scale using 1 equiv. of **1a**, and 3 equiv. of **2a**, Ni(COD)<sub>2</sub> (5 mol %), ligands (10 mol %) and base (2.0 equiv.) in 1 mL of THF at 25 °C for 12 h. <sup>b</sup>Isolated yield of **3aa** after chromatographic purification. <sup>c</sup>The ee (enantiomeric excess) of **3aa** was determined by chiral phase HPLC.

**Table S3. Screening of solvents for Ni-catalyzed asymmetric alkenylation<sup>a</sup>**

| entry | Solvent           | yield of <b>3aa</b> (%) <sup>b</sup> | ee of <b>3aa</b> (%) <sup>c</sup> |
|-------|-------------------|--------------------------------------|-----------------------------------|
| 1     | THF               | 94                                   | 92                                |
| 2     | DME               | 4                                    | -                                 |
| 3     | CPME              | 62                                   | 48                                |
| 4     | MTBE              | 32                                   | 20                                |
| 5     | Cyclohexane       | 5                                    | -                                 |
| 6     | Toluene           | 0                                    | -                                 |
| 7     | Et <sub>2</sub> O | 32                                   | 14                                |
| 8     | 1,4-Dioxane       | 4                                    | -                                 |

<sup>a</sup>Reactions conducted on a 0.1 mmol scale using 1 equiv. of **1a**, and 3 equiv. of **2a**, Ni(COD)<sub>2</sub> (5 mol %), ligands (10 mol %) and NaN(SiMe<sub>3</sub>)<sub>2</sub> (2.0 equiv.) in 1 mL of solvent at 25 °C for 12 h. <sup>b</sup>Isolated yield of **3aa** after chromatographic purification. <sup>c</sup>The ee (enantiomeric excess) of **3aa** was determined by chiral phase HPLC.

**Table S4. Further optimization for Ni-catalyzed asymmetric alkenylation<sup>a</sup>**

| entry | Ni(COD) <sub>2</sub> / L1 (mol %) | NaN(SiMe <sub>3</sub> ) <sub>2</sub> (equiv.) | yield of <b>3aa</b> (%) <sup>b</sup> | ee of <b>3aa</b> (%) <sup>c</sup> |
|-------|-----------------------------------|-----------------------------------------------|--------------------------------------|-----------------------------------|
| 1     | 5/10                              | 2                                             | 94                                   | 92                                |
| 2     | 2.5/5                             | 2                                             | 62                                   | 92                                |
| 3     | 5/10                              | 1.5                                           | 95                                   | 93                                |

<sup>a</sup>Reactions conducted on a 0.1 mmol scale using 1 equiv. of **1a**, and 3 equiv. of **2a**, Ni(COD)<sub>2</sub>, **L1** and NaN(SiMe<sub>3</sub>)<sub>2</sub> in 1 mL of THF at 25 °C for 12 h. <sup>b</sup>Isolated yield of **3aa** after chromatographic purification. <sup>c</sup>The ee (enantiomeric excess) of **3aa** was determined by chiral phase HPLC.

**Table S5. Switching Ni to Pd as metal sources<sup>a</sup>**

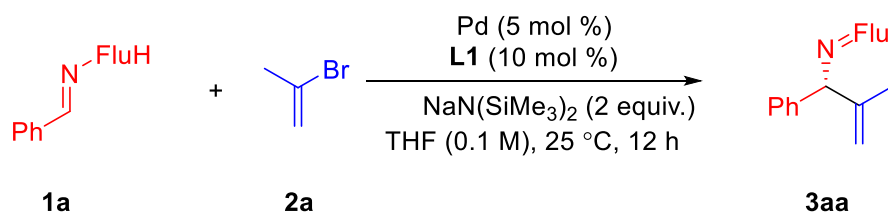

| entry | Pd                         | yield of <b>3aa</b> (%) <sup>b</sup> | ee of <b>3aa</b> (%) |
|-------|----------------------------|--------------------------------------|----------------------|
| 1     | Pd(OAc) <sub>2</sub>       | 4                                    | -                    |
| 2     | [PdCl(allyl)] <sub>2</sub> | 0                                    | -                    |
| 3     | Pd(dba) <sub>2</sub>       | 0                                    | -                    |
| 4     | Pd(COD)Cl <sub>2</sub>     | 0                                    | -                    |

<sup>a</sup>Reactions conducted on a 0.1 mmol scale using 1 equiv. of **1a**, and 3 equiv. of **2a**, Pd (5 mol %), **L1** (10 mol %) and NaN(SiMe<sub>3</sub>)<sub>2</sub> (1.5 equiv.) in 1 mL of THF at 25 °C for 12 h. <sup>b</sup>Isolated yield of **3aa** after chromatographic purification.

## 5. General procedure and characterization of Ni-catalyzed asymmetric alkenylation of imines with alkenyl bromides (Tables 2 and 3)

### *General procedure for the Ni-catalyzed asymmetric alkenylation of imines with alkenyl bromides:*

An oven-dried 8 mL reaction vial equipped with a stir bar was charged with imines (**1**, 0.4 mmol, 1.0 equiv) and vinyl halides (**2**, 1.2 mmol, 3.0 equiv) in a glove box under a nitrogen atmosphere at room temperature. A stock solution containing Ni(COD)<sub>2</sub> (13.8 mg, 0.02 mmol, 5 mol %) and **L1** (17.0 mg, 0.04 mmol, 10 mol %) in 2 mL of dry THF was taken up by syringe and added to the reaction vial under nitrogen. Then, NaN(SiMe<sub>3</sub>)<sub>2</sub> (110.0 mg, 0.6 mmol, 1.5 equiv) in 2 mL of dry THF was added to the reaction mixture. The vial was capped, removed from the glove box, and stirred for 12 h at 25 °C until TLC showed complete consumption of the imine. The reaction mixture was quenched with three drops of H<sub>2</sub>O, diluted with 3 mL of ethyl acetate, and filtered over a pad of MgSO<sub>4</sub> and silica. The pad was rinsed with ethyl acetate (3X2 mL) and the combined solutions were concentrated in *vacuo*. The crude material was loaded onto a silica gel column and purified by flash chromatography.

### *General workup procedure for the Ni-catalyzed asymmetric alkenylation of imines with alkenyl bromides (for 3ag, 3ah, 4ka, 4la):*

After the reaction was complete, 1 M aq. HCl (0.5 mL) was added to the reaction mixture. The resulting mixture was left at room temperature until the imine products were fully consumed, and then diluted with H<sub>2</sub>O (2 mL). The mixture was concentrated to remove THF and extracted with Et<sub>2</sub>O (5 mL) to remove fluorenone. The aqueous layer was basified with NaOH (1 M) to pH > 9 and extracted with CH<sub>2</sub>Cl<sub>2</sub>. To the combined organic layers was added Et<sub>3</sub>N (100 μL) and Boc<sub>2</sub>O (100 μL) or 4-methylbenzenesulfonyl chloride (95 mg). The mixture was left at 25 °C until full consumption of the primary amine was indicated by TLC analysis. The mixture was concentrated and subjected to flash chromatography to give the corresponding carbamates or sulfonamides.

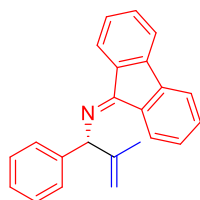

**(R)-N-(2-Methyl-1-phenylallyl)-9H-fluoren-9-imine (3aa):** The reaction was performed following the general procedure with (*E*)-*N*-(9*H*-fluoren-9-yl)-1-phenylmethanimine **1a** (107.7 mg, 0.4 mmol) and 2-bromoprop-1-ene **2a** (145.2 mg, 1.2 mmol). The crude product was separated by flash chromatography on deactivated silica gel (hexanes to hexanes:ethyl acetate = 100:1). Further purification was performed on an Agilent HPLC 1260 system using acetonitrile:H<sub>2</sub>O (90:10 vol./vol.) as mobile phase and flow rate of 4 mL/min with monitoring at 254 nm to give the product **3aa** (117.6 mg, 95% yield, 93% *ee*) as a yellow oil. *R<sub>f</sub>* = 0.50 (hexanes:ethyl acetate = 10:1). <sup>1</sup>H NMR (400 MHz, Chloroform-*d*) δ 7.85 (d, *J* = 7.2 Hz, 1H), 7.64 (d, *J* = 7.6 Hz, 1H), 7.51 (d, *J* = 7.2 Hz, 1H), 7.45 – 7.40 (m, 3H), 7.30 – 7.19 (m, 5H), 7.16 – 7.13 (m, 1H), 7.09 (dd, *J* = 7.6, 1.2 Hz, 1H), 5.98 (s, 1H), 5.06 (s, 1H), 4.84 (s, 1H), 1.74 (s, 3H) ppm; <sup>13</sup>C{<sup>1</sup>H} NMR (100 MHz, Chloroform-*d*) δ 162.5, 147.6, 144.1, 142.6, 141.1, 139.0, 131.7, 131.3, 131.0, 128.5, 128.4, 128.0, 127.7, 127.5, 127.1, 123.1, 120.4, 119.3, 112.0, 71.0, 19.3 ppm; IR (thin film): 3059, 2962, 1643, 1599, 1491, 1318, 1028, 792, 729 cm<sup>-1</sup>; HRMS calc'd for C<sub>23</sub>H<sub>20</sub>N<sup>+</sup> 310.1590, found 310.1589 [M+H]<sup>+</sup>; HPLC analysis: Daicel CHIRALPAK OJ-H, *n*-hexane/*i*-PrOH = 75/25, flow rate = 0.3 mL/min, λ = 250 nm, retention time: *t*<sub>major</sub> = 19.72 min, *t*<sub>minor</sub> = 24.71 min; [α]<sub>D</sub><sup>20</sup> = -16.17 (c 1.0, CHCl<sub>3</sub>).

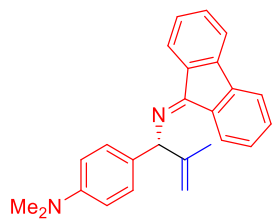

**(R)-4-(1-((9H-Fluoren-9-ylidene)amino)-2-methylallyl)-N,N-dimethylaniline (3ba):** The reaction was performed following the general procedure with (*E*)-4-(((9H-fluoren-9-yl)imino)methyl)-*N,N*-dimethylaniline **1b** (125.0 mg, 0.4 mmol) and 2-bromoprop-1-ene **2a** (145.2 mg, 1.2 mmol). The crude product was separated by flash chromatography on deactivated silica gel (hexanes to hexanes:ethyl acetate = 30:1). Further purification was performed on an Agilent HPLC 1260 system using acetonitrile:H<sub>2</sub>O (90:10 vol./vol.) as mobile phase and flow rate of 4 mL/min with monitoring at 254 nm to give the product **3ba** (135.4 mg, 96% yield, 91% *ee*) as a yellow oil.  $R_f$  = 0.36 (hexanes:ethyl acetate = 10:1). <sup>1</sup>H NMR (400 MHz, Chloroform-*d*)  $\delta$  7.85 (d,  $J$  = 7.6 Hz, 1H), 7.69 (d,  $J$  = 7.6 Hz, 1H), 7.52 (d,  $J$  = 7.6 Hz, 1H), 7.45 (d,  $J$  = 7.2 Hz, 1H), 7.29 (dd,  $J$  = 7.6, 1.2 Hz, 1H), 7.26 – 7.23 (m, 3H), 7.20 (td,  $J$  = 7.6, 1.2 Hz, 1H), 7.11 (td,  $J$  = 7.6, 1.2 Hz, 1H), 6.62 (d,  $J$  = 4.4 Hz, 2H), 5.91 (s, 1H), 5.03 (s, 1H), 4.82 (s, 1H), 2.81 (s, 6H), 1.77 (s, 3H) ppm; <sup>13</sup>C{<sup>1</sup>H} NMR (100 MHz, Chloroform-*d*)  $\delta$  161.9, 149.8, 148.1, 144.0, 141.0, 139.2, 131.8, 131.1, 130.8, 130.5, 128.3, 128.2, 128.0, 127.9, 123.1, 120.3, 119.3, 112.8, 111.3, 70.5, 40.8, 19.4 ppm; IR (thin film): 3058, 2967, 1644, 1458, 1275, 1110, 1033, 899, 764, 673 cm<sup>-1</sup>; HRMS calc'd for C<sub>25</sub>H<sub>25</sub>N<sub>2</sub><sup>+</sup> 353.2012, found 353.2018 [M+H]<sup>+</sup>; HPLC analysis: Daicel CHIRALPAK AD-H, *n*-hexane/*i*-PrOH = 95/5, flow rate = 0.5 mL/min,  $\lambda$  = 250 nm, retention time:  $t_{major}$  = 10.59 min,  $t_{minor}$  = 11.46 min;  $[\alpha]_D^{20}$  = +44.81 (c 1.0, CHCl<sub>3</sub>).

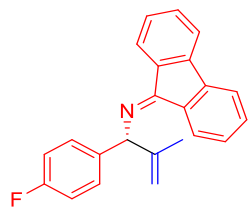

**(R)-N-(1-(4-Fluorophenyl)-2-methylallyl)-9H-fluoren-9-imine (3ca):** The reaction was performed following the general procedure with (*E*)-*N*-(9H-fluoren-9-yl)-1-(4-fluorophenyl)methanimine **1c** (114.9 mg, 0.4 mmol) and 2-bromoprop-1-ene **2a** (145.2 mg, 1.2 mmol). The crude product was separated by flash chromatography on deactivated silica gel (hexanes to hexanes:ethyl acetate = 100:1). Further purification was performed on an Agilent HPLC 1260 system using acetonitrile:H<sub>2</sub>O (90:10 vol./vol.) as mobile phase and flow rate of 4 mL/min with monitoring at 254 nm to give the product **3ca** (119.2 mg, 91% yield, 90% *ee*) as a yellow oil.  $R_f$  = 0.49 (hexanes:ethyl acetate = 10:1). <sup>1</sup>H NMR (400 MHz, Chloroform-*d*)  $\delta$  7.85 (d,  $J$  = 7.6 Hz, 1H), 7.63 (d,  $J$  = 8.0 Hz, 1H), 7.55 (d,  $J$  = 7.6 Hz, 1H), 7.47 (d,  $J$  = 7.6 Hz, 1H), 7.42 – 7.37 (m, 2H), 7.33 – 7.28 (m, 2H), 7.22 (td,  $J$  = 7.2, 1.2 Hz, 1H), 7.13 (td,  $J$  = 7.6, 1.2 Hz, 1H), 6.97 – 6.91 (m, 2H), 5.95 (s, 1H), 5.04 (s, 1H), 4.85 (s, 1H), 1.73 (s, 3H) ppm; <sup>13</sup>C{<sup>1</sup>H} NMR (100 MHz, Chloroform-*d*)  $\delta$  162.7, 162.0 (d,  $^1J_{C-F}$  = 243.4 Hz), 147.2, 144.2, 141.1, 138.9, 138.3 (d,  $^4J_{C-F}$  = 1.4 Hz), 131.6, 131.5, 131.2, 129.1 (d,  $^3J_{C-F}$  = 7.8 Hz), 128.5, 128.1, 127.7, 123.1, 120.5, 119.4, 115.3 (d,  $^2J_{C-F}$  = 21.0 Hz), 112.2, 70.2, 19.3 ppm; <sup>19</sup>F NMR (376 MHz, Chloroform-*d*)  $\delta$  -116.0 (s, 1F). IR (thin film): 3054, 2987, 1644, 1505, 1449, 1275, 1095, 751, 654 cm<sup>-1</sup>; HRMS calc'd for C<sub>23</sub>H<sub>19</sub>FN<sup>+</sup> 328.1496, found 328.1495 [M+H]<sup>+</sup>; HPLC analysis: Daicel CHIRALPAK AD-H, *n*-hexane/*i*-PrOH = 85/15, flow rate = 0.3 mL/min,  $\lambda$  = 250 nm, retention time:  $t_{major}$  = 13.69 min,  $t_{minor}$  = 15.22 min;  $[\alpha]_D^{20}$  = -14.85 (c 1.0, CHCl<sub>3</sub>).

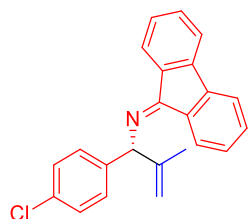

**(R)-N-(1-(4-Chlorophenyl)-2-methylallyl)-9H-fluoren-9-imine (3da):** The reaction was performed following the general procedure with (*E*)-1-(4-chlorophenyl)-*N*-(9H-fluoren-9-yl)methanimine **1d** (121.5 mg, 0.4 mmol) and 2-bromoprop-1-ene **2a** (145.2 mg, 1.2 mmol). The crude product was separated by flash chromatography on deactivated silica gel (hexanes to hexanes:ethyl acetate = 100:1). Further purification was performed on an Agilent HPLC 1260

system using acetonitrile:H<sub>2</sub>O (90:10 vol./vol.) as mobile phase and flow rate of 4 mL/min with monitoring at 254 nm to give the product **3da** (86.7 mg, 63% yield, 85% *ee*) as a yellow oil.  $R_f$  = 0.47 (hexanes:ethyl acetate = 10:1). <sup>1</sup>H NMR (400 MHz, Chloroform-*d*) δ 7.82 (d, *J* = 7.6 Hz, 1H), 7.59 (d, *J* = 7.6 Hz, 1H), 7.51 (d, *J* = 7.2 Hz, 1H), 7.43 (d, *J* = 7.6 Hz, 1H), 7.36 – 7.34 (m, 2H), 7.29 (dd, *J* = 7.2, 1.2 Hz, 1H), 7.25 (dd, *J* = 7.6, 1.2 Hz, 1H), 7.22 – 7.17 (m, 3H), 7.10 (td, *J* = 7.6, 1.2 Hz, 1H), 5.92 (s, 1H), 5.03 (s, 1H), 4.83 (s, 1H), 1.71 (s, 3H) ppm; <sup>13</sup>C{<sup>1</sup>H} NMR (100 MHz, Chloroform-*d*) δ 163.1, 147.4, 144.5, 141.5, 141.4, 139.2, 133.1, 131.9, 131.8, 131.5, 129.2, 128.9, 128.8, 128.4, 127.9, 123.4, 120.8, 119.7, 112.7, 70.6, 19.5 ppm; IR (thin film): 3394, 3061, 2873, 1644, 1275, 1090, 913, 764, 654 cm<sup>-1</sup>; HRMS calc'd for C<sub>23</sub>H<sub>19</sub>CIN<sup>+</sup> 344.1201, found 344.1203 [M+H]<sup>+</sup>; HPLC analysis: Daicel CHIRALPAK OJ-H, *n*-hexane/*i*-PrOH = 75/25, flow rate = 0.3 mL/min, λ = 250 nm, retention time:  $t_{major}$  = 16.09 min,  $t_{minor}$  = 17.69 min; [α]<sub>D</sub><sup>20</sup> = -9.28 (c 1.0, CHCl<sub>3</sub>).

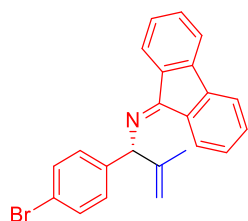

**(R)-N-(1-(4-Bromophenyl)-2-methylallyl)-9H-fluoren-9-imine (3ea):**

The reaction was performed following the general procedure with (*E*)-1-(4-bromophenyl)-*N*-(9H-fluoren-9-yl)methanimine **1e** (139.3 mg, 0.4 mmol) and 2-bromoprop-1-ene **2a** (145.2 mg, 1.2 mmol). The crude product was separated by flash chromatography on deactivated silica gel (hexanes to hexanes:ethyl acetate = 100:1). Further purification was performed on an Agilent HPLC 1260 system using acetonitrile:H<sub>2</sub>O (85:15 vol./vol.) as mobile phase and flow rate of 4 mL/min with monitoring at 254 nm to give the product **3ea** (127.4 mg, 82% yield, 85% *ee*) as a yellow oil.  $R_f$  = 0.41 (hexanes:ethyl acetate = 10:1). <sup>1</sup>H NMR (400 MHz, Chloroform-*d*) δ 7.83 (d, *J* = 7.6 Hz, 1H), 7.60 (d, *J* = 7.6 Hz, 1H), 7.53 (d, *J* = 7.6 Hz, 1H), 7.46 (d, *J* = 7.6 Hz, 1H), 7.38 – 7.35 (m, 2H), 7.32 – 7.27 (m, 4H), 7.21 (td, *J* = 7.6, 1.2 Hz, 1H), 7.12 (td, *J* = 7.6, 1.2 Hz, 1H), 5.92 (s, 1H), 5.04 (s, 1H), 4.85 (s, 1H), 1.72 (s, 3H) ppm; <sup>13</sup>C{<sup>1</sup>H} NMR (100 MHz, Chloroform-*d*) δ 162.8, 145.0, 144.2, 141.7, 141.1, 138.9, 131.6, 131.5, 131.2, 129.3, 128.5, 128.1, 127.6, 123.1, 121.0, 120.5, 119.4, 112.4, 70.3, 19.2 ppm, one resonance was not observed due to overlapping peaks; IR (thin film): 3061, 2916, 2359, 1644, 1449, 1101, 913, 764, 633 cm<sup>-1</sup>; HRMS calc'd for C<sub>23</sub>H<sub>19</sub>BrN<sup>+</sup> 388.0695, found 388.0692 [M+H]<sup>+</sup>; HPLC analysis: Daicel CHIRALPAK AD-H, *n*-hexane/*i*-PrOH = 85/15, flow rate = 0.3 mL/min, λ = 250 nm, retention time:  $t_{major}$  = 14.37 min,  $t_{minor}$  = 16.59 min; [α]<sub>D</sub><sup>20</sup> = -45.77 (c 1.0, CHCl<sub>3</sub>).

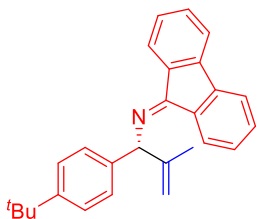

**(R)-N-(1-(4-(*tert*-Butyl)phenyl)-2-methylallyl)-9H-fluoren-9-imine (3fa):**

The reaction was performed following the general procedure with (*E*)-1-(4-(*tert*-butyl)phenyl)-*N*-(9H-fluoren-9-yl)methanimine **1f** (130.2 mg, 0.4 mmol) and 2-bromoprop-1-ene **2a** (145.2 mg, 1.2 mmol). The crude product was separated by flash chromatography on deactivated silica gel (hexanes to hexanes:ethyl acetate = 100:1). Further purification was performed on an Agilent HPLC 1260 system using acetonitrile:H<sub>2</sub>O (90:10 vol./vol.) as mobile phase and flow rate of 4 mL/min with monitoring at 254 nm to give the product **3fa** (128.7 mg, 88% yield, 92% *ee*) as a yellow oil.  $R_f$  = 0.50 (hexanes:ethyl acetate = 10:1). <sup>1</sup>H NMR (400 MHz, Chloroform-*d*) δ 7.86 (d, *J* = 7.2 Hz, 1H), 7.71 (d, *J* = 7.6 Hz, 1H), 7.55 (d, *J* = 7.2 Hz, 1H), 7.47 (d, *J* = 7.2 Hz, 1H), 7.36 – 7.26 (m, 6H), 7.21 (td, *J* = 7.2, 0.8 Hz, 1H), 7.14 (td, *J* = 7.2, 0.8 Hz, 1H), 5.98 (s, 1H), 5.06 (s, 1H), 4.84 (s, 1H), 1.76 (s, 3H), 1.22 (s, 9H) ppm; <sup>13</sup>C{<sup>1</sup>H} NMR (100 MHz, Chloroform-*d*) δ 162.2, 149.9, 147.6, 144.2, 141.1, 131.8, 131.3, 131.0, 128.4, 128.0, 127.8, 127.2, 125.4, 123.1, 120.4, 119.3, 111.8, 70.6, 34.6, 31.5, 19.5 ppm, two resonances were not observed due to overlapping peaks; IR (thin film): 3058 2963, 1644, 1449, 1364,

1269, 1102, 898, 792, 653  $\text{cm}^{-1}$ ; **HRMS** calc'd for  $\text{C}_{27}\text{H}_{28}\text{N}^+$  366.2216, found 366.2213  $[\text{M}+\text{H}]^+$ ; **HPLC analysis**: Daicel CHIRALPAK OD-H, *n*-hexane/*i*-PrOH = 95/5, flow rate = 0.5 mL/min,  $\lambda$  = 250 nm, retention time:  $t_{\text{major}}$  = 11.68 min,  $t_{\text{minor}}$  = 14.95 min;  $[\alpha]_{\text{D}}^{20}$  = +17.38 (c 1.0,  $\text{CHCl}_3$ ).

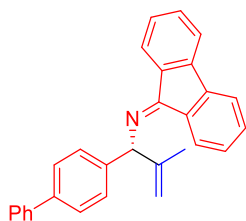

**(R)-N-(1-([1,1'-Biphenyl]-4-yl)-2-methylallyl)-9H-fluoren-9-imine (3ga)**: The reaction was performed following the general procedure with

(*E*)-1-([1,1'-biphenyl]-4-yl)-*N*-(9*H*-fluoren-9-yl)methanimine **1g** (138.2 mg, 0.4 mmol) and 2-bromoprop-1-ene **2a** (145.2 mg, 1.2 mmol). The crude product was separated by flash chromatography on deactivated silica gel (hexanes to hexanes:ethyl acetate = 100:1). Further purification was performed on an Agilent HPLC 1260 system using acetonitrile: $\text{H}_2\text{O}$  (90:10 vol./vol.) as mobile phase and flow rate of 4 mL/min with monitoring at 254 nm to give the product **3ga** (141.9 mg, 92% yield, 90% *ee*) as a yellow oil.  $R_f$  = 0.47 (hexanes:ethyl acetate = 10:1).  **$^1\text{H}$  NMR** (400 MHz, Chloroform-*d*)  $\delta$  7.88 (d,  $J$  = 7.2 Hz, 1H), 7.69 (d,  $J$  = 7.6 Hz, 1H), 7.54 (d,  $J$  = 7.6 Hz, 1H), 7.50 – 7.46 (m, 7H), 7.34 – 7.27 (m, 4H), 7.22 (td,  $J$  = 7.2, 1.2 Hz, 2H), 7.13 (td,  $J$  = 7.6, 1.2 Hz, 1H), 6.03 (s, 1H), 5.10 (s, 1H), 4.88 (s, 1H), 1.79 (s, 3H) ppm;  **$^{13}\text{C}\{^1\text{H}\}$  NMR** (100 MHz, Chloroform-*d*)  $\delta$  162.6, 147.5, 144.2, 141.7, 141.1, 140.0, 139.0, 131.7, 131.4, 131.1, 128.8, 128.4, 128.1, 128.0, 127.8, 127.3, 127.2, 123.1, 120.5, 119.4, 112.1, 70.7, 19.4 ppm, two resonances were not observed due to overlapping peaks; **IR** (thin film): 3059, 2970, 1648, 1449, 1219, 1014, 849, 772, 654  $\text{cm}^{-1}$ ; **HRMS** calc'd for  $\text{C}_{29}\text{H}_{24}\text{N}^+$  386.1903, found 386.1903  $[\text{M}+\text{H}]^+$ ; **HPLC analysis**: Daicel CHIRALPAK OJ-H, *n*-hexane/*i*-PrOH = 70/30, flow rate = 0.25 mL/min,  $\lambda$  = 250 nm, retention time:  $t_{\text{major}}$  = 32.10 min,  $t_{\text{minor}}$  = 28.92 min;  $[\alpha]_{\text{D}}^{20}$  = -11.18 (c 1.0,  $\text{CHCl}_3$ ).

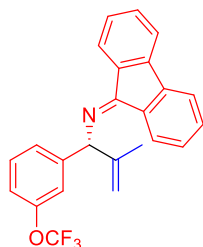

**(R)-N-(2-Methyl-1-(3-(trifluoromethoxy)phenyl)allyl)-9H-fluoren-9-imine (3ha)**: The reaction was performed following the general procedure with

(*E*)-*N*-(9*H*-fluoren-9-yl)-1-(3-(trifluoromethoxy)phenyl)methanimine **1h** (141.3 mg, 0.4 mmol) and 2-bromoprop-1-ene **2a** (145.2 mg, 1.2 mmol). The crude product was separated by flash chromatography on deactivated silica gel (hexanes to hexanes:ethyl acetate = 100:1). Further purification was performed on an Agilent HPLC 1260 system using acetonitrile: $\text{H}_2\text{O}$  (90:10 vol./vol.) as mobile phase and flow rate of 4 mL/min with monitoring at 254 nm to give the product **3ha** (122.7 mg, 78% yield, 90% *ee*) as a yellow oil.  $R_f$  = 0.47 (hexanes:ethyl acetate = 10:1).  **$^1\text{H}$  NMR** (400 MHz, Chloroform-*d*)  $\delta$  7.85 (d,  $J$  = 7.6 Hz, 1H), 7.65 (d,  $J$  = 7.6 Hz, 1H), 7.56 (d,  $J$  = 7.2 Hz, 1H), 7.48 (d,  $J$  = 7.6 Hz, 1H), 7.38 – 7.23 (m, 6H), 7.17 – 7.13 (m, 1H), 7.03 (d,  $J$  = 8.0 Hz, 1H), 5.98 (s, 1H), 5.07 (s, 1H), 4.87 (s, 1H), 1.73 (s, 3H) ppm;  **$^{13}\text{C}\{^1\text{H}\}$  NMR** (100 MHz, Chloroform-*d*)  $\delta$  163.0, 149.6, 146.7, 145.3, 144.3, 141.1, 138.9, 131.64, 131.58, 131.2, 129.7, 128.5, 128.1, 127.7, 126.0, 123.1, 120.6, 120.7 (q,  $J_{\text{C-F}}$  = 255.2 Hz), 120.3, 119.4, 112.7, 70.3, 19.2 ppm, one resonance was not observed due to overlapping peaks;  **$^{19}\text{F}$  NMR** (376 MHz, Chloroform-*d*)  $\delta$  -57.6 (s, 3F). **IR** (thin film): 3056, 2923, 1651, 1450, 1213, 1102, 913, 742, 654  $\text{cm}^{-1}$ ; **HRMS** calc'd for  $\text{C}_{24}\text{H}_{19}\text{F}_3\text{NO}^+$  394.1413, found 394.1413  $[\text{M}+\text{H}]^+$ ; **HPLC analysis**: Daicel CHIRALPAK OJ-H, *n*-hexane/*i*-PrOH = 98/2, flow rate = 0.5 mL/min,  $\lambda$  = 260 nm, retention time:  $t_{\text{major}}$  = 10.87 min,  $t_{\text{minor}}$  = 13.14 min;  $[\alpha]_{\text{D}}^{20}$  = -17.08 (c 1.0,  $\text{CHCl}_3$ ).

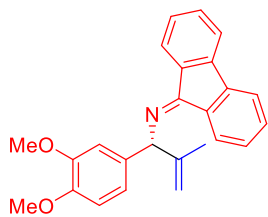

**(R)-N-(1-(3,4-Dimethoxyphenyl)-2-methylallyl)-9H-fluoren-9-imine**

**(3ia):** The reaction was performed following the general procedure with (*E*)-1-(3,4-dimethoxyphenyl)-*N*-(9*H*-fluoren-9-yl)methanimine **1i** (131.8 mg, 0.4 mmol) and 2-bromoprop-1-ene **2a** (145.2 mg, 1.2 mmol). The crude product was separated by flash chromatography on deactivated silica gel (hexanes to hexanes:ethyl acetate = 15:1). Further purification was

performed on an Agilent HPLC 1260 system using acetonitrile:H<sub>2</sub>O (80:20 vol./vol.) as mobile phase and flow rate of 4 mL/min with monitoring at 254 nm to give the product **3ia** (141.9 mg, 96% yield, 95% *ee*) as a yellow oil. *R<sub>f</sub>* = 0.30 (hexanes:ethyl acetate = 10:1). <sup>1</sup>H NMR (400 MHz, Chloroform-*d*) δ 7.85 (d, *J* = 7.6 Hz, 1H), 7.67 (d, *J* = 8.0 Hz, 1H), 7.54 (d, *J* = 7.6 Hz, 1H), 7.47 (d, *J* = 7.2 Hz, 1H), 7.33 – 7.28 (m, 2H), 7.21 (t, *J* = 7.2 Hz, 1H), 7.13 (t, *J* = 7.6 Hz, 1H), 7.00 (s, 1H), 6.92 (d, *J* = 8.4 Hz, 1H), 6.73 (dd, *J* = 8.4, 2.0 Hz, 1H), 5.91 (s, 1H), 5.03 (s, 1H), 4.85 (s, 1H), 3.80 (s, 3H), 3.76 (s, 3H), 1.76 (s, 3H) ppm; <sup>13</sup>C{<sup>1</sup>H} NMR (100 MHz, Chloroform-*d*) δ 162.5, 149.1, 148.2, 147.5, 144.1, 141.1, 139.0, 135.2, 131.7, 131.3, 131.0, 128.4, 128.0, 127.8, 123.0, 120.4, 119.7, 119.3, 111.8, 111.0, 110.8, 70.6, 56.02, 55.98, 19.4 ppm; IR (thin film): 3053, 2976, 2253, 1643, 1449, 1376, 1269, 1048, 880, 760, 657 cm<sup>-1</sup>; HRMS calc'd for C<sub>25</sub>H<sub>24</sub>NO<sub>2</sub><sup>+</sup> 370.1802, found 370.1802 [M+H]<sup>+</sup>; HPLC analysis: Daicel CHIRALPAK AD-H, *n*-hexane/*i*-PrOH = 98/2, flow rate = 1.0 mL/min, λ = 254 nm, retention time: *t*<sub>major</sub> = 17.23 min, *t*<sub>minor</sub> = 18.93 min; [α]<sub>D</sub><sup>20</sup> = +3.99 (c 1.0, CHCl<sub>3</sub>).

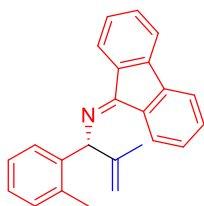

**(R)-N-(2-Methyl-1-(*o*-tolyl)allyl)-9H-fluoren-9-imine (3ja):**

The reaction was performed following the general procedure with (*E*)-*N*-(9*H*-fluoren-9-yl)-1-(*o*-tolyl)methanimine **1j** (113.4 mg, 0.4 mmol) and 2-bromoprop-1-ene **2a** (145.2 mg, 1.2 mmol). The crude product was separated by flash chromatography on deactivated silica gel (hexanes to hexanes:ethyl acetate = 100:1). Further purification was performed on an Agilent HPLC 1260 system using acetonitrile:H<sub>2</sub>O (75:25 vol./vol.) as mobile phase and flow rate of 4 mL/min with monitoring at 254 nm to give the product **3ja** (108.7 mg, 84% yield, 92% *ee*) as a yellow oil. *R<sub>f</sub>* = 0.47 (hexanes:ethyl acetate = 10:1). <sup>1</sup>H NMR (400 MHz, Chloroform-*d*) δ 7.85 (d, *J* = 7.6 Hz, 1H), 7.57 (d, *J* = 5.6 Hz, 1H), 7.55 (d, *J* = 4.4 Hz, 1H), 7.50 (d, *J* = 3.6 Hz, 1H), 7.48 (d, *J* = 3.2 Hz, 1H), 7.33 – 7.28 (m, 2H), 7.22 (d, *J* = 7.2, 1.2 Hz, 1H), 7.15 (dd, *J* = 7.6, 1.2 Hz, 1H), 7.12 – 7.07 (m, 3H), 6.08 (s, 1H), 4.89 – 4.88 (m, 2H), 2.37 (s, 3H), 1.76 (s, 3H) ppm;

<sup>13</sup>C{<sup>1</sup>H} NMR (100 MHz, Chloroform-*d*) δ 162.5, 145.9, 144.2, 141.1, 140.7, 139.0, 136.0, 131.6, 131.3, 131.0, 130.7, 128.4, 128.1, 128.0, 127.2, 127.0, 126.3, 123.2, 120.5, 119.3, 112.6, 68.0, 20.2, 19.8 ppm; IR (thin film): 3055, 2928, 1633, 1488, 1221, 1138, 1008, 945, 772, 656 cm<sup>-1</sup>; HRMS calc'd for C<sub>24</sub>H<sub>22</sub>N<sup>+</sup> 324.1747, found 324.1748 [M+H]<sup>+</sup>; HPLC analysis: Daicel CHIRALPAK AD-H, *n*-hexane/*i*-PrOH = 85/15, flow rate = 0.3 mL/min, λ = 250 nm, retention time: *t*<sub>major</sub> = 14.67 min, *t*<sub>minor</sub> = 17.00 min; [α]<sub>D</sub><sup>20</sup> = -60.02 (c 1.0, CHCl<sub>3</sub>).

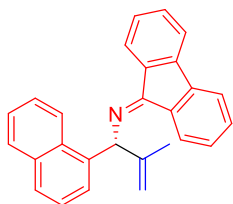

**(R)-N-(2-Methyl-1-(naphthalen-1-yl)allyl)-9H-fluoren-9-imine (3ka):**

The reaction was performed following the general procedure with (*E*)-*N*-(9*H*-fluoren-9-yl)-1-(naphthalen-2-yl)methanimine **1k** (127.8 mg, 0.4 mmol) and 2-bromoprop-1-ene **2a** (145.2 mg, 1.2 mmol). The crude product was separated by flash chromatography on deactivated silica gel (hexanes to hexanes:ethyl acetate = 100:1). Further purification was performed on an Agilent HPLC 1260 system using acetonitrile:H<sub>2</sub>O (70:30 vol./vol.) as mobile phase and flow rate of 2.5 mL/min with monitoring at 254 nm to give the

product **3ka** (120.8 mg, 84% yield, 92% *ee*) as a yellow solid. **Mp**: 167 – 169 °C. **R<sub>f</sub>** = 0.48 (hexanes:ethyl acetate = 10:1). **<sup>1</sup>H NMR** (400 MHz, Chloroform-*d*) δ 7.91 (d, *J* = 7.6 Hz, 1H), 7.91 (d, *J* = 6.4 Hz, 1H), 7.75 – 7.70 (m, 3H), 7.67 (d, *J* = 7.6 Hz, 1H), 7.61 (dd, *J* = 8.4, 2.0 Hz, 1H), 7.54 (d, *J* = 7.6 Hz, 1H), 7.48 (d, *J* = 7.2 Hz, 1H), 7.37 – 7.22 (m, 5H), 7.14 – 7.08 (m, 1H), 6.13 (s, 1H), 5.12 (s, 1H), 4.90 (s, 1H), 1.78 (s, 3H) ppm; **<sup>13</sup>C{<sup>1</sup>H} NMR** (100 MHz, Chloroform-*d*) δ 162.8, 147.4, 144.2, 141.2, 140.0, 139.0, 133.5, 132.9, 131.7, 131.4, 131.1, 128.4, 128.3, 128.13, 128.08, 127.8, 127.8, 126.1, 125.9, 125.8, 123.2, 120.5, 119.4, 112.3, 71.3, 19.4 ppm, one resonance was not observed due to overlapping peaks; **IR** (thin film): 3054, 2988, 1621, 1448, 1319, 1199, 1110, 1005, 879, 781, 655 cm<sup>-1</sup>; **HRMS** calc'd for C<sub>27</sub>H<sub>22</sub>N<sup>+</sup> 360.1747, found 360.1747 [M+H]<sup>+</sup>; **HPLC analysis**: Daicel CHIRALPAK OD-H, *n*-hexane/*i*-PrOH = 95/5, flow rate = 0.8 mL/min, λ = 260 nm, retention time: *t*<sub>major</sub> = 15.77 min, *t*<sub>minor</sub> = 10.85 min; [α]<sub>D</sub><sup>20</sup> = +11.25 (c 1.0, CHCl<sub>3</sub>).

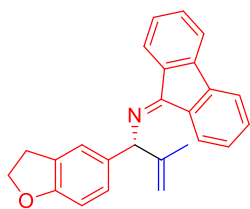

**(R)-N-(1-(2,3-Dihydrobenzofuran-5-yl)-2-methylallyl)-9H-fluoren-9-imine (3la)**: The reaction was performed following the general procedure with (*E*)-1-(2,3-dihydrobenzofuran-5-yl)-*N*-(9*H*-fluoren-9-yl)methanimine **1l** (124.6 mg, 0.4 mmol) and 2-bromoprop-1-ene **2a** (145.2 mg, 1.2 mmol). The crude product was separated by flash chromatography on deactivated silica gel

(hexanes to hexanes:ethyl acetate = 20:1). Further purification was performed on an Agilent HPLC 1260 system using acetonitrile:H<sub>2</sub>O (90:10 vol./vol.) as mobile phase and flow rate of 4 mL/min with monitoring at 254 nm to give the product **3la** (129.3 mg, 92% yield, 95% *ee*) as a yellow oil. **R<sub>f</sub>** = 0.34 (hexanes:ethyl acetate = 10:1). **<sup>1</sup>H NMR** (400 MHz, Chloroform-*d*) δ 7.86 (d, *J* = 7.2 Hz, 1H), 7.69 (d, *J* = 7.6 Hz, 1H), 7.57 (d, *J* = 7.6 Hz, 1H), 7.49 (d, *J* = 7.2 Hz, 1H), 7.33 (td, *J* = 4.4, 1.2 Hz, 1H), 7.30 (td, *J* = 4.4, 1.2 Hz, 1H), 7.26 (s, 1H), 7.23 (td, *J* = 7.6, 1.2 Hz, 1H), 7.17 – 7.12 (m, 2H), 6.66 (d, *J* = 8.0 Hz, 1H), 5.92 (s, 1H), 5.04 (s, 1H), 4.84 (s, 1H), 4.47 (t, *J* = 8.8 Hz, 2H), 3.11 (t, *J* = 8.4 Hz, 2H), 1.77 (s, 3H) ppm; **<sup>13</sup>C{<sup>1</sup>H} NMR** (100 MHz, Chloroform-*d*) δ 162.2, 159.3, 147.9, 144.1, 141.1, 139.1, 134.7, 131.8, 131.3, 131.0, 128.4, 128.0, 127.8, 127.31, 127.25, 124.0, 123.1, 120.4, 119.3, 111.6, 109.0, 71.4, 70.6, 30.0, 19.4 ppm; **IR** (thin film): 3056, 2988, 1610, 1543, 1449, 1275, 1100, 913, 764, 655 cm<sup>-1</sup>; **HRMS** calc'd for C<sub>25</sub>H<sub>22</sub>NO<sup>+</sup> 352.1696, found 352.1694 [M+H]<sup>+</sup>; **HPLC analysis**: Daicel CHIRALPAK OJ-H, *n*-hexane/*i*-PrOH = 85/15, flow rate = 0.5 mL/min, λ = 260 nm, retention time: *t*<sub>major</sub> = 15.97 min, *t*<sub>minor</sub> = 18.71 min; [α]<sub>D</sub><sup>20</sup> = +31.71 (c 1.0, CHCl<sub>3</sub>).

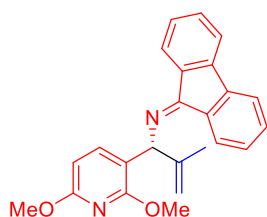

**(R)-N-(1-(2,6-Dimethoxypyridin-3-yl)-2-methylallyl)-9H-fluoren-9-imine (3ma)**: The reaction was performed following the general procedure with (*E*)-1-(2,6-dimethoxypyridin-3-yl)-*N*-(9*H*-fluoren-9-yl)methanimine **1m** (132.2 mg, 0.4 mmol) and 2-bromoprop-1-ene **2a** (145.2 mg, 1.2 mmb). The crude product was separated by flash chromatography on deactivated silica gel (hexanes to hexanes:ethyl acetate = 100:1). Further purification

was performed on an Agilent HPLC 1260 system using acetonitrile:H<sub>2</sub>O (90:10 vol./vol.) as mobile phase and flow rate of 4 mL/min with monitoring at 254 nm to give the product **3ma** (134.9 mg, 91% yield, 85% *ee*) as a yellow oil. **R<sub>f</sub>** = 0.41 (hexanes:ethyl acetate = 10:1). **<sup>1</sup>H NMR** (400 MHz, Chloroform-*d*) δ 7.82 – 7.79 (m, 2H), 7.73 (d, *J* = 8.0 Hz, 1H), 7.49 (d, *J* = 7.2 Hz, 1H), 7.43 (d, *J* = 7.2 Hz, 1H), 7.26 (t, *J* = 7.6 Hz, 2H), 7.20 – 7.12 (m, 2H), 6.22 – 6.20 (m, 2H), 5.01 (s, 1H), 4.80 (s, 1H), 3.91 (s, 3H), 3.79 (s, 3H), 1.76 (s, 3H) ppm; **<sup>13</sup>C{<sup>1</sup>H} NMR** (100 MHz, Chloroform-*d*) δ 162.4, 161.9, 159.5, 146.8, 144.0, 141.1, 140.2, 139.1, 131.7, 131.2, 130.9, 128.3, 128.1, 127.6, 122.9, 120.3, 119.3, 116.6, 111.5, 101.2,



62.5, 53.6, 53.5, 19.8 ppm; **IR** (thin film): 3058, 2944, 1641, 1450, 1386, 1245, 1095, 954, 764, 653  $\text{cm}^{-1}$ ; **HRMS** calc'd for  $\text{C}_{24}\text{H}_{23}\text{N}_2\text{O}_2^+$  371.1754, found 371.1753  $[\text{M}+\text{H}]^+$ ; **HPLC analysis**: Daicel CHIRALPAK OD-H, *n*-hexane/*i*-PrOH = 98/2, flow rate = 0.8 mL/min,  $\lambda$  = 260 nm, retention time:  $t_{\text{major}}$  = 8.23 min,  $t_{\text{minor}}$  = 6.63 min;  $[\alpha]_{\text{D}}^{20}$  = -46.97 (c 1.0,  $\text{CHCl}_3$ ).

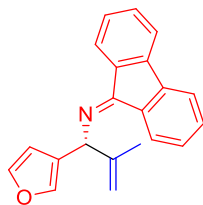

**(R)-N-(1-(Furan-3-yl)-2-methylallyl)-9H-fluoren-9-imine (3na)**: The reaction was performed following the general procedure with (*E*)-*N*-(9*H*-fluoren-9-yl)-1-(furan-3-yl)methanimine **1n** (103.7 mg, 0.4 mmol) and 2-bromoprop-1-ene **2a** (145.2 mg, 1.2 mmol). The crude product was separated by flash chromatography on deactivated silica gel (hexanes to hexanes:ethyl acetate = 100:1). Further purification was performed on an Agilent HPLC 1260 system using acetonitrile:H<sub>2</sub>O (90:10 vol./vol.) as mobile phase and flow rate of 5 mL/min with monitoring at 254 nm to give the product **3na** (112.6 mg, 94% yield, 51% *ee*) as a yellow oil.  $R_f$  = 0.46 (hexanes:ethyl acetate = 10:1). **<sup>1</sup>H NMR** (400 MHz, Chloroform-*d*)  $\delta$  7.83 (d,  $J$  = 7.2 Hz, 1H), 7.67 (d,  $J$  = 7.6 Hz, 1H), 7.56 (d,  $J$  = 7.6 Hz, 1H), 7.49 (d,  $J$  = 7.6 Hz, 1H), 7.34 – 7.30 (m, 3H), 7.26 – 7.20 (m, 2H), 7.14 (td,  $J$  = 7.6, 0.8 Hz, 1H), 6.37 (s, 1H), 5.94 (s, 1H), 5.06 (s, 1H), 4.88 (s, 1H), 1.83 (s, 3H) ppm; **<sup>13</sup>C{<sup>1</sup>H} NMR** (100 MHz, Chloroform-*d*)  $\delta$  162.7, 146.9, 144.1, 143.2, 141.1, 140.0, 138.9, 131.6, 131.4, 131.1, 128.4, 128.1, 127.9, 126.5, 123.1, 120.5, 119.4, 112.2, 110.1, 63.9, 18.9 ppm; **IR** (thin film): 3052, 2920, 1644, 1449, 1324, 1158, 1019, 913, 874, 730, 654  $\text{cm}^{-1}$ ; **HRMS** calc'd for  $\text{C}_{21}\text{H}_{18}\text{NO}^+$  300.1383, found 300.1383  $[\text{M}+\text{H}]^+$ ; **HPLC analysis**: Daicel CHIRALPAK OD-H, *n*-hexane/*i*-PrOH = 98/2, flow rate = 1.0 mL/min,  $\lambda$  = 250 nm, retention time:  $t_{\text{major}}$  = 8.03 min,  $t_{\text{minor}}$  = 9.33 min;  $[\alpha]_{\text{D}}^{20}$  = -7.37 (c 1.0,  $\text{CHCl}_3$ ).

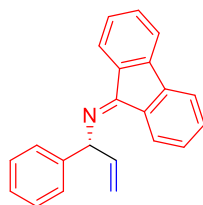

**(R)-N-(1-Phenylallyl)-9H-fluoren-9-imine (3ab)**: The reaction was performed following the general procedure with (*E*)-*N*-(9*H*-fluoren-9-yl)-1-phenylmethanimine **1a** (107.7 mg, 0.4 mmol) and bromoethene **2b** (1.2 ml, 1.0 M in THF, 1.2 mmol). The crude product was separated by flash chromatography on deactivated silica gel (hexanes to hexanes:ethyl acetate = 100:1). Further purification was performed on an Agilent HPLC 1260 system using acetonitrile:H<sub>2</sub>O (80:20 vol./vol.) as mobile phase and flow rate of 4 mL/min with monitoring at 254 nm to give the product **3ab** (70.9 mg, 60% yield, 87% *ee*) as a yellow oil.  $R_f$  = 0.34 (hexanes:ethyl acetate = 10:1). **<sup>1</sup>H NMR** (400 MHz, Chloroform-*d*)  $\delta$  7.85 (d,  $J$  = 7.2 Hz, 1H), 7.75 (d,  $J$  = 7.6 Hz, 1H), 7.52 (d,  $J$  = 7.2 Hz, 1H), 7.45 (t,  $J$  = 7.6 Hz, 3H), 7.30 – 7.25 (m, 4H), 7.22 – 7.10 (m, 3H), 6.24 – 6.16 (m, 1H), 6.07 (d,  $J$  = 7.6 Hz, 1H), 5.19 (d,  $J$  = 17.2 Hz, 1H), 5.10 (d,  $J$  = 10.4 Hz, 1H) ppm; **<sup>13</sup>C{<sup>1</sup>H} NMR** (100 MHz, Chloroform-*d*)  $\delta$  162.7, 144.1, 143.0, 141.1, 140.1, 131.7, 131.4, 131.1, 128.7, 128.4, 128.1, 127.8, 127.4, 127.2, 123.1, 120.5, 119.4, 115.1, 67.4 ppm, one resonance was not observed due to overlapping peaks; **IR** (thin film): 3005, 2988, 1644, 1599, 1449, 1275, 1066, 913, 749, 700  $\text{cm}^{-1}$ ; **HRMS** calc'd for  $\text{C}_{22}\text{H}_{18}\text{N}^+$  296.1434, found 296.1432  $[\text{M}+\text{H}]^+$ ; **HPLC analysis**: Daicel CHIRALPAK OD-H, *n*-hexane/*i*-PrOH = 95/5, flow rate = 0.5 mL/min,  $\lambda$  = 260 nm, retention time:  $t_{\text{major}}$  = 10.57 min,  $t_{\text{minor}}$  = 12.20 min;  $[\alpha]_{\text{D}}^{20}$  = +48.76 (c 1.0,  $\text{CHCl}_3$ ).

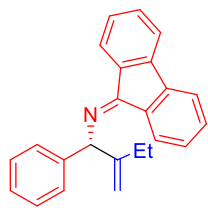

**(R)-N-(2-Methylene-1-phenylbutyl)-9H-fluoren-9-imine (3ac):** The reaction was performed following the general procedure with (*E*)-*N*-(9*H*-fluoren-9-yl)-1-phenylmethanimine **1a** (107.7 mg, 0.4 mmol) and 2-bromobut-1-ene **2c** (162.0 mg, 1.2 mmol). The crude product was separated by flash chromatography on deactivated silica gel (hexanes to hexanes:ethyl acetate = 100:1). Further purification was performed on an Agilent HPLC 1260 system using acetonitrile:H<sub>2</sub>O (90:10 vol./vol.) as mobile phase and flow rate of 4 mL/min with monitoring at 254 nm to give the product **3ac** (116.4 mg, 90% yield, 93% *ee*) as a yellow oil. *R<sub>f</sub>* = 0.32 (hexanes:ethyl acetate = 10:1). <sup>1</sup>H NMR (400 MHz, Chloroform-*d*) δ 7.86 (d, *J* = 7.2 Hz, 1H), 7.69 (d, *J* = 8.0 Hz, 1H), 7.55 (d, *J* = 7.6 Hz, 1H), 7.48 (d, *J* = 7.6 Hz, 1H), 7.42 (d, *J* = 7.2 Hz, 2H), 7.33 – 7.22 (m, 5H), 7.17 – 7.11 (m, 2H), 6.05 (s, 1H), 5.12 (s, 1H), 4.88 (s, 1H), 2.27 – 2.17 (m, 1H), 2.06 – 1.96 (m, 1H), 0.98 (t, *J* = 7.2 Hz, 3H) ppm; <sup>13</sup>C{<sup>1</sup>H} NMR (100 MHz, Chloroform-*d*) δ 162.3, 153.1, 144.2, 142.9, 141.1, 139.1, 131.7, 131.3, 131.0, 128.5, 128.4, 128.2, 128.0, 127.7, 127.1, 123.1, 120.4, 119.3, 109.8, 70.8, 25.1, 12.3 ppm; IR (thin film): 3051, 2955, 1638, 1448, 1252, 1111, 999, 906, 731, 702 cm<sup>-1</sup>; HRMS calc'd for C<sub>24</sub>H<sub>22</sub>N<sup>+</sup> 324.1747, found 324.1749 [M+H]<sup>+</sup>; HPLC analysis: Daicel CHIRALPAK OD-H, *n*-hexane/*i*-PrOH = 90/10, flow rate = 0.5 mL/min, λ = 260 nm, retention time: *t*<sub>major</sub> = 6.65 min, *t*<sub>minor</sub> = 8.75 min; [α]<sub>D</sub><sup>20</sup> = +12.53 (c 1.0, CHCl<sub>3</sub>).

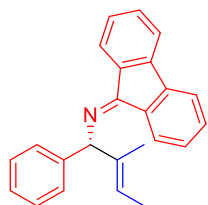

**(R, E)-N-(2-Methyl-1-phenylbut-2-en-1-yl)-9H-fluoren-9-imine (3ad):** The reaction was performed following the general procedure with (*E*)-*N*-(9*H*-fluoren-9-yl)-1-phenylmethanimine **1a** (107.7 mg, 0.4 mmol) and (*E*)-2-bromobut-2-ene **2d** (162.0 mg, 1.2 mmol). The crude product was separated by flash chromatography on deactivated silica gel (hexanes to hexanes:ethyl acetate = 100:1). Further purification was performed on an Agilent HPLC 1260 system using acetonitrile:H<sub>2</sub>O (90:10 vol./vol.) as mobile phase and flow rate of 4 mL/min with monitoring at 254 nm to give the product **3ad** (80.2 mg, 62% yield, 70% *ee*) as a yellow oil. *R<sub>f</sub>* = 0.57 (hexanes:ethyl acetate = 10:1). <sup>1</sup>H NMR (400 MHz, Chloroform-*d*) δ 7.86 (d, *J* = 7.2 Hz, 1H), 7.63 (d, *J* = 7.6 Hz, 1H), 7.53 (d, *J* = 7.2 Hz, 1H), 7.47 (d, *J* = 7.6 Hz, 1H), 7.36 (d, *J* = 7.2 Hz, 2H), 7.32 – 7.20 (m, 5H), 7.15 – 7.07 (m, 2H), 5.96 (s, 1H), 5.60 (q, *J* = 6.4 Hz, 1H), 1.65 (s, 3H), 1.57 (d, *J* = 6.8 Hz, 3H) ppm; <sup>13</sup>C{<sup>1</sup>H} NMR (100 MHz, Chloroform-*d*) δ 162.2, 144.1, 142.9, 141.1, 139.1, 138.5, 131.8, 131.2, 130.9, 128.38, 128.36, 128.0, 127.8, 127.4, 126.9, 123.1, 121.0, 120.4, 119.3, 72.5, 13.5, 12.9 ppm; IR (thin film): 3051, 2967, 1652, 1444, 1334, 1153, 1032, 913, 748, 667 cm<sup>-1</sup>; HRMS calc'd for C<sub>24</sub>H<sub>22</sub>N<sup>+</sup> 324.1747, found 324.1749 [M+H]<sup>+</sup>; HPLC analysis: Daicel CHIRALPAK OJ-H, *n*-hexane/*i*-PrOH = 95/5, flow rate = 0.3 mL/min, λ = 260 nm, retention time: *t*<sub>major</sub> = 21.74 min, *t*<sub>minor</sub> = 16.67 min; [α]<sub>D</sub><sup>20</sup> = +0.20 (c 1.0, CHCl<sub>3</sub>).

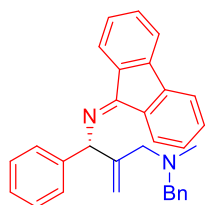

**(S)-2-(((9*H*-Fluoren-9-ylidene)amino)(phenyl)methyl)-*N*-benzyl-*N*-methylprop-2-en-1-amine (3ae):** The reaction was performed following the general procedure with (*E*)-*N*-(9*H*-fluoren-9-yl)-1-phenylmethanimine **1a** (107.7 mg, 0.4 mmol) and *N*-benzyl-2-bromo-*N*-methylprop-2-en-1-amine **2e** (288.2 mg, 1.2 mmol). The crude product was separated by flash chromatography on deactivated silica gel (hexanes to hexanes:ethyl acetate = 15:1). Further purification was performed on an Agilent HPLC 1260 system using acetonitrile:H<sub>2</sub>O (95:5 vol./vol.) as mobile phase and flow rate of 4 mL/min with monitoring at 254 nm to give the product **3ae** (140.6 mg, 82% yield, 93% *ee*) as a yellow oil. *R<sub>f</sub>* = 0.40 (hexanes:ethyl acetate = 10:1). <sup>1</sup>H NMR (400 MHz, Chloroform-*d*) δ 8.07 (d, *J* = 7.6 Hz, 1H), 7.82 (d, *J* = 7.6 Hz, 1H), 7.53 (d, *J* = 7.6 Hz, 1H), 7.46 (d, *J* = 7.6 Hz, 1H), 7.38 – 7.35

(m, 2H), 7.31 – 7.25 (m, 4H), 7.23 – 7.16 (m, 6H), 7.15 – 7.10 (m, 1H), 7.02 (td,  $J = 7.6, 1.2$  Hz, 1H), 6.29 (s, 1H), 5.26 (s, 1H), 5.08 (s, 1H), 3.50 (d,  $J = 13.2$  Hz, 1H), 3.36 (d,  $J = 13.2$  Hz, 1H), 3.02 (d,  $J = 13.2$  Hz, 1H), 2.80 (d,  $J = 13.2$  Hz, 1H), 2.06 (s, 3H) ppm;  $^{13}\text{C}\{^1\text{H}\}$  NMR (100 MHz, Chloroform-*d*)  $\delta$  161.9, 149.3, 144.0, 143.2, 141.1, 139.7, 139.1, 131.9, 131.2, 130.9, 129.1, 128.4, 128.3, 128.13, 128.07, 128.0, 127.1, 123.0, 120.3, 119.3, 113.8, 67.2, 62.6, 61.5, 42.4 ppm, two resonances were not observed due to overlapping peaks; IR (thin film): 3392, 2928, 1644, 1449, 1270, 1102, 1024, 913, 742, 698, 654  $\text{cm}^{-1}$ ; HRMS calc'd for  $\text{C}_{31}\text{H}_{29}\text{N}_2^+$  429.2325, found 429.2330  $[\text{M}+\text{H}]^+$ ; HPLC analysis: Daicel CHIRALPAK IA, *n*-hexane/*i*-PrOH = 98/2, flow rate = 0.8 mL/min,  $\lambda = 260$  nm, retention time:  $t_{\text{major}} = 5.09$  min,  $t_{\text{minor}} = 5.51$  min;  $[\alpha]_{\text{D}}^{20} = +151.54$  (c 1.0,  $\text{CHCl}_3$ ).

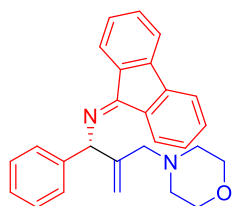

**(S)-N-(2-(Morpholinomethyl)-1-phenylallyl)-9H-fluoren-9-imine (3af):**

The reaction was performed following the general procedure with (*E*)-*N*-(9H-fluoren-9-yl)-1-phenylmethanimine **1a** (107.7 mg, 0.4 mmol) and 4-(2-bromoallyl)morpholine **2f** (247.3 mg, 1.2 mmol). The crude product was separated by flash chromatography on deactivated silica gel (hexanes to hexanes:ethyl acetate = 15:1). Further purification was performed on an Agilent HPLC 1260 system using acetonitrile:H<sub>2</sub>O (90:10 vol./vol.) as mobile phase and flow rate of 5 mL/min with monitoring at 254 nm to give the product **3af** (123.1 mg, 78% yield, 95% *ee*) as a yellow oil.  $R_f = 0.38$  (hexanes:ethyl acetate = 10:1).  $^1\text{H}$  NMR (400 MHz, Chloroform-*d*)  $\delta$  8.00 (d,  $J = 8.0$  Hz, 1H), 7.82 (d,  $J = 7.2$  Hz, 1H), 7.50 (d,  $J = 7.6$  Hz, 1H), 7.46 (d,  $J = 6.8$  Hz, 2H), 7.42 (d,  $J = 7.2$  Hz, 1H), 7.28 – 7.21 (m, 4H), 7.17 – 7.09 (m, 3H), 6.30 (s, 1H), 5.22 (s, 1H), 5.02 (s, 1H), 3.64 – 3.55 (m, 4H), 2.88 (d,  $J = 13.2$  Hz, 1H), 2.77 (d,  $J = 13.2$  Hz, 1H), 2.37 – 2.32 (m, 2H), 2.27 – 2.21 (m, 2H) ppm;  $^{13}\text{C}\{^1\text{H}\}$  NMR (100 MHz, Chloroform-*d*)  $\delta$  161.7, 147.5, 144.1, 143.0, 141.0, 139.0, 131.9, 131.2, 130.9, 128.4, 128.3, 128.0, 127.9, 127.7, 127.2, 123.0, 120.4, 119.3, 114.2, 67.3, 62.3, 53.9 ppm, one resonance was not observed due to overlapping peaks; IR (thin film): 2960, 2853, 1643, 1450, 1347, 1261, 1116, 913, 793, 700, 653  $\text{cm}^{-1}$ ; HRMS calc'd for  $\text{C}_{27}\text{H}_{27}\text{N}_2\text{O}^+$  395.2118, found 395.2118  $[\text{M}+\text{H}]^+$ ; HPLC analysis: Daicel CHIRALPAK OD-H, *n*-hexane/*i*-PrOH = 98/2, flow rate = 0.8 mL/min,  $\lambda = 260$  nm, retention time:  $t_{\text{major}} = 11.37$  min,  $t_{\text{minor}} = 17.14$  min;  $[\alpha]_{\text{D}}^{20} = +95.34$  (c 1.0,  $\text{CHCl}_3$ ).

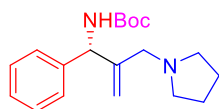

**tert-Butyl (S)-(1-Phenyl-2-(pyrrolidin-1-ylmethyl)allyl)carbamate (3ag):**

The reaction was performed following the general procedure with (*E*)-*N*-(9H-fluoren-9-yl)-1-phenylmethanimine **1a** (107.7 mg, 0.4 mmol) and 1-(2-bromoallyl)pyrrolidine **2g** (228.1 mg, 1.2 mmol). The reaction was worked up following **General Workup Procedure**. The crude product was separated by flash chromatography on deactivated silica gel (hexanes to hexanes:ethyl acetate = 5:1) to give the product **3ag** (97.5 mg, 77% yield, 98% *ee*) as a colorless oil.  $R_f = 0.39$  (hexanes:ethyl acetate = 3:1).  $^1\text{H}$  NMR (400 MHz, Chloroform-*d*)  $\delta$  7.25 – 7.23 (m, 4H), 7.18 – 7.13 (m, 1H), 5.33 (d,  $J = 8.0$  Hz, 1H), 5.11 (s, 1H), 4.96 (s, 1H), 3.08 (d,  $J = 12.8$  Hz, 1H), 2.60 (d,  $J = 12.8$  Hz, 1H), 2.43 – 2.38 (m, 2H), 2.36 – 2.31 (m, 2H), 1.73 – 1.66 (m, 4H), 1.36 (s, 9H) ppm;  $^{13}\text{C}\{^1\text{H}\}$  NMR (100 MHz, Chloroform-*d*)  $\delta$  155.7, 145.5, 141.5, 128.4, 127.0, 126.5, 115.7, 78.9, 60.2, 59.0, 53.9, 28.6, 23.6 ppm; IR (thin film): 2931, 1717, 1437, 1356, 1219, 1107, 977, 772  $\text{cm}^{-1}$ ; HRMS calc'd for  $\text{C}_{19}\text{H}_{29}\text{N}_2\text{O}_2^+$  317.2224, found 317.2224  $[\text{M}+\text{H}]^+$ ; HPLC analysis of the *N*-fluorenyl imine product: Daicel CHIRALPAK OJ-H, *n*-hexane/*i*-PrOH = 90/10, flow rate = 0.5 mL/min,  $\lambda = 260$  nm, retention time:  $t_{\text{major}} = 8.33$  min,  $t_{\text{minor}} = 11.79$  min;  $[\alpha]_{\text{D}}^{20} = -38.42$  (c 1.0,  $\text{CHCl}_3$ ).

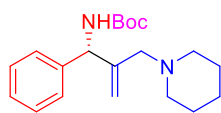

**tert-Butyl (S)-(1-Phenyl-2-(piperidin-1-ylmethyl)allyl)carbamate (3ah):**

The reaction was performed following the general procedure with (*E*)-*N*-(9*H*-fluoren-9-yl)-1-phenylmethanimine **1a** (107.7 mg, 0.4 mmol) and 1-(2-bromoallyl)piperidine **2h** (244.9 mg, 1.2 mmol). The reaction was worked up following **General Workup Procedure**. The crude product was separated by flash chromatography on deactivated silica gel (hexanes to hexanes:ethyl acetate = 5:1) to give the product **3ah** (95.2 mg, 72% yield, 98% *ee*) as a colorless oil.  $R_f$  = 0.43 (hexanes:ethyl acetate = 3:1).  $^1\text{H NMR}$  (400 MHz, Chloroform-*d*)  $\delta$  7.70 (s, 1H), 7.33 – 7.28 (m, 4H), 7.25 – 7.19 (m, 1H), 5.40 (d,  $J$  = 7.6 Hz, 1H), 5.25 (s, 1H), 4.95 (s, 1H), 2.90 (d,  $J$  = 12.8 Hz, 1H), 2.55 (d,  $J$  = 12.8 Hz, 1H), 2.52 – 2.37 (m, 2H), 2.29 – 2.11 (m, 2H), 1.64 – 1.57 (m, 4H), 1.44 (s, 9H), 1.33 – 1.29 (m, 2H) ppm;  $^{13}\text{C}\{^1\text{H}\}$  NMR (100 MHz, Chloroform-*d*)  $\delta$  155.8, 144.3, 141.7, 128.4, 127.0, 126.4, 117.2, 78.8, 62.4, 60.6, 54.3, 28.6, 26.3, 24.5 ppm; **IR** (thin film): 2988, 1802, 1449, 1380, 1219, 1126, 898, 771  $\text{cm}^{-1}$ ; **HRMS** calc'd for  $\text{C}_{20}\text{H}_{31}\text{N}_2\text{O}_2^+$  331.2380, found 331.2376  $[\text{M}+\text{H}]^+$ ; **HPLC analysis** of the *N*-fluorenyl imine product: Daicel CHIRALPAK OJ-H, *n*-hexane/*i*-PrOH = 80/20, flow rate = 0.1 mL/min,  $\lambda$  = 260 nm, retention time:  $t_{\text{major}}$  = 37.91 min,  $t_{\text{minor}}$  = 41.37 min;  $[\alpha]_{\text{D}}^{20}$  = -53.94 (c 1.0,  $\text{CHCl}_3$ ).

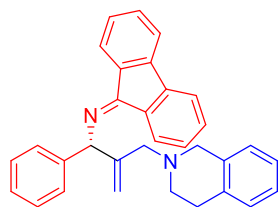

**(S)-N-(2-((3,4-Dihydroisoquinolin-2(1H)-yl)methyl)-1-phenylallyl)-9H-fluoren-9-imine (3ai):**

The reaction was performed following the general procedure with (*E*)-*N*-(9*H*-fluoren-9-yl)-1-phenylmethanimine **1a** (107.7 mg, 0.4 mmol) and 2-(2-bromoallyl)-1,2,3,4-tetrahydroisoquinoline **2i** (302.6 mg, 1.2 mmol). The crude product was separated by flash chromatography on deactivated silica gel (hexanes to hexanes:ethyl acetate = 15:1). Further purification was performed on an Agilent HPLC 1260 system using acetonitrile:H<sub>2</sub>O (95:5 vol./vol.) as mobile phase and flow rate of 5 mL/min with monitoring at 254 nm to give the product **3ai** (163.9 mg, 93% yield, 95% *ee*) as a yellow oil.  $R_f$  = 0.35 (hexanes:ethyl acetate = 10:1).  $^1\text{H NMR}$  (400 MHz, Chloroform-*d*)  $\delta$  7.98 (d,  $J$  = 7.6 Hz, 1H), 7.84 (d,  $J$  = 7.6 Hz, 1H), 7.52 (d,  $J$  = 6.8 Hz, 2H), 7.44 (d,  $J$  = 7.6 Hz, 1H), 7.40 (d,  $J$  = 7.6 Hz, 1H), 7.28 – 7.23 (m, 3H), 7.19 – 7.12 (m, 3H), 7.09 – 6.99 (m, 3H), 6.85 (d,  $J$  = 7.2 Hz, 1H), 6.66 (t,  $J$  = 7.2 Hz, 1H), 6.38 (s, 1H), 5.28 (s, 1H), 5.08 (s, 1H), 3.57 (d,  $J$  = 15.2 Hz, 1H), 3.42 (d,  $J$  = 14.8 Hz, 1H), 3.07 (d,  $J$  = 13.2 Hz, 1H), 2.94 – 2.86 (m, 2H), 2.83 – 2.76 (m, 1H), 2.71 – 2.65 (m, 1H), 2.60 – 2.54 (m, 1H) ppm;  $^{13}\text{C}\{^1\text{H}\}$  NMR (100 MHz, Chloroform-*d*)  $\delta$  161.8, 148.2, 143.8, 143.3, 141.1, 139.0, 135.3, 134.7, 131.8, 131.1, 130.9, 128.8, 128.4, 128.22, 128.16, 128.0, 127.2, 126.8, 126.2, 125.6, 123.0, 120.2, 119.2, 113.7, 67.3, 62.1, 56.3, 51.3, 29.6 ppm, one resonance was not observed due to overlapping peaks; **IR** (thin film): 2989, 1637, 1450, 1252, 1110, 934, 889, 703, 653  $\text{cm}^{-1}$ ; **HRMS** calc'd for  $\text{C}_{32}\text{H}_{29}\text{N}_2^+$  441.2325, found 441.2325  $[\text{M}+\text{H}]^+$ ; **HPLC analysis**: Daicel CHIRALPAK IA, *n*-hexane/*i*-PrOH = 98/2, flow rate = 0.8 mL/min,  $\lambda$  = 260 nm, retention time:  $t_{\text{major}}$  = 5.64 min,  $t_{\text{minor}}$  = 6.90 min;  $[\alpha]_{\text{D}}^{20}$  = +66.02 (c 1.0,  $\text{CHCl}_3$ ).

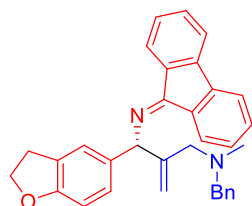

**(S)-2-(((9H-Fluoren-9-ylidene)amino)(2,3-dihydrobenzofuran-5-yl)-methyl)-N-benzyl-N-methylprop-2-en-1-amine (3le):**

The reaction was performed following the general procedure with (*E*)-1-(2,3-dihydrobenzofuran-5-yl)-*N*-(9*H*-fluoren-9-yl)methanimine **1l** (124.6 mg, 0.4 mmol) and *N*-benzyl-2-bromo-*N*-methylprop-2-en-1-amine **2e** (288.2 mg, 1.2 mmol). The crude product was separated by flash chromatography on deactivated silica gel (hexanes to hexanes:ethyl acetate = 15:1). Further purification was performed on

an Agilent HPLC 1260 system using acetonitrile:H<sub>2</sub>O (95:5 vol./vol.) as mobile phase and flow rate of 5 mL/min with monitoring at 254 nm to give the product **3la** (169.4 mg, 90% yield, 95% *ee*) as a yellow oil. *R<sub>f</sub>* = 0.31 (hexanes:ethyl acetate = 10:1). <sup>1</sup>H NMR (400 MHz, Chloroform-*d*) δ 8.10 (d, *J* = 7.6 Hz, 1H), 7.79 (d, *J* = 7.2 Hz, 1H), 7.44 (d, *J* = 7.2 Hz, 1H), 7.37 (d, *J* = 7.2 Hz, 1H), 7.25 – 7.09 (m, 9H), 7.01 – 6.97 (m, 2H), 6.56 (d, *J* = 8.0 Hz, 1H), 6.19 (s, 1H), 5.23 (s, 1H), 4.99 (s, 1H), 4.34 (t, *J* = 8.4 Hz, 2H), 3.47 (d, *J* = 13.2 Hz, 1H), 3.29 (d, *J* = 13.2 Hz, 1H), 3.03 – 2.94 (m, 3H), 2.70 (d, *J* = 12.8 Hz, 1H), 2.03 (s, 3H) ppm; <sup>13</sup>C{<sup>1</sup>H} NMR (100 MHz, Chloroform-*d*) δ 161.4, 159.2, 149.6, 143.9, 141.0, 139.7, 139.0, 135.3, 131.8, 131.1, 130.8, 129.1, 128.3, 128.2, 128.1, 128.0, 127.8, 127.04, 126.96, 124.5, 122.9, 120.2, 119.2, 113.3, 108.8, 71.3, 66.7, 62.6, 61.4, 42.5, 29.9 ppm; IR (thin film): 3319, 2925, 2787, 1641, 1488, 1449, 1239, 1022, 942, 730, 698 cm<sup>-1</sup>; HRMS calc'd for C<sub>33</sub>H<sub>31</sub>N<sub>2</sub>O<sup>+</sup> 471.2431, found 471.2436 [M+H]<sup>+</sup>; HPLC analysis: Daicel CHIRALPAK IE, *n*-hexane/*i*-PrOH = 85/15, flow rate = 0.3 mL/min, λ = 260 nm, retention time: *t*<sub>major</sub> = 5.09 min, *t*<sub>minor</sub> = 5.51 min; [α]<sub>D</sub><sup>20</sup> = +202.91 (c 1.0, CHCl<sub>3</sub>).

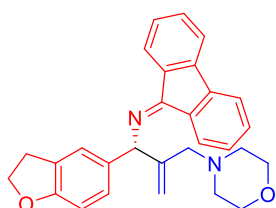

**(S)-N-(1-(2,3-Dihydrobenzofuran-5-yl)-2-(morpholinomethyl)allyl)-9H-fluoren-9-imine (3lf):** The reaction was performed following the general procedure with (*E*)-1-(2,3-dihydrobenzofuran-5-yl)-*N*-(9*H*-fluoren-9-yl)methanimine **1l** (124.6 mg, 0.4 mmol) and 4-(2-bromoallyl)morpholine **2f** (247.3 mg, 1.2 mmol). The crude product was separated by flash chromatography on deactivated silica gel (hexanes to hexanes:ethyl

acetate = 15:1). Further purification was performed on an Agilent HPLC 1260 system using acetonitrile:H<sub>2</sub>O (70:30 vol./vol.) as mobile phase and flow rate of 4 mL/min with monitoring at 254 nm to give the product **3lf** (153.7 mg, 88% yield, 86% *ee*) as a yellow oil. *R<sub>f</sub>* = 0.35 (hexanes:ethyl acetate = 10:1). <sup>1</sup>H NMR (400 MHz, Chloroform-*d*) δ 8.03 (d, *J* = 7.6 Hz, 1H), 7.82 (d, *J* = 7.6 Hz, 1H), 7.51 (d, *J* = 7.2 Hz, 1H), 7.43 (d, *J* = 7.2 Hz, 1H), 7.32 – 7.24 (m, 3H), 7.19 – 7.11 (m, 3H), 6.64 (d, *J* = 8.4 Hz, 1H), 6.25 (s, 1H), 5.22 (s, 1H), 4.99 (s, 1H), 4.42 (t, *J* = 8.8 Hz, 2H), 3.66 – 3.57 (m, 4H), 3.06 (t, *J* = 8.8 Hz, 2H), 2.91 (d, *J* = 13.2 Hz, 1H), 2.76 (d, *J* = 13.2 Hz, 1H), 2.40 – 2.34 (m, 2H), 2.27 – 2.23 (m, 2H) ppm; <sup>13</sup>C{<sup>1</sup>H} NMR (100 MHz, Chloroform-*d*) δ 161.3, 159.3, 147.9, 144.0, 140.9, 139.0, 135.0, 131.9, 131.2, 130.8, 128.2, 127.9, 127.8, 127.7, 127.2, 124.4, 122.9, 120.3, 119.2, 113.7, 108.8, 71.3, 67.3, 66.8, 62.4, 53.9, 29.9 ppm; IR (thin film): 2961, 1642, 1488, 1260, 1116, 913, 867, 764, 654 cm<sup>-1</sup>; HRMS calc'd for C<sub>29</sub>H<sub>29</sub>N<sub>2</sub>O<sub>2</sub><sup>+</sup> 437.2224, found 437.2226 [M+H]<sup>+</sup>; HPLC analysis: Daicel CHIRALPAK IE, *n*-hexane/*i*-PrOH = 99/1, flow rate = 1.2 mL/min, λ = 260 nm, retention time: *t*<sub>major</sub> = 22.99 min, *t*<sub>minor</sub> = 25.19 min; [α]<sub>D</sub><sup>20</sup> = +122.52 (c 1.0, CHCl<sub>3</sub>).

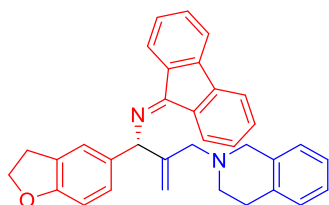

**(S)-N-(1-(2,3-Dihydrobenzofuran-5-yl)-2-((3,4-dihydroisoquinolin-2(1*H*)-yl)methyl)allyl)-9H-fluoren-9-imine (3li):** The reaction was performed following the general procedure with (*E*)-1-(2,3-dihydrobenzofuran-5-yl)-*N*-(9*H*-fluoren-9-yl)methanimine **1l** (124.6 mg, 0.4 mmol) and 2-(2-bromoallyl)-1,2,3,4-tetrahydroisoquinoline **2i** (302.6 mg, 1.2 mmol). The crude product was separated by flash chromatography on deactivated silica gel (hexanes to hexanes:ethyl acetate = 15:1). Further purification was performed on an Agilent HPLC 1260 system using acetonitrile:H<sub>2</sub>O (95:5 vol./vol.) as mobile phase and flow rate of 4 mL/min with monitoring at 254 nm to give the product **3li** (175.7 mg, 91% yield, 95% *ee*) as a yellow oil. *R<sub>f</sub>* = 0.44 (hexanes:ethyl acetate = 10:1). <sup>1</sup>H NMR (400 MHz, Chloroform-*d*) δ 7.99 (d, *J* = 8.0 Hz, 1H), 7.84 (d, *J* = 7.2 Hz, 1H), 7.45 (d, *J* = 7.2 Hz, 1H), 7.41 (d, *J* = 7.2 Hz, 1H), 7.37 (s,

1H), 7.26 – 7.13 (m, 4H), 7.09 – 6.99 (m, 3H), 6.85 (d,  $J = 7.2$  Hz, 1H), 6.68 – 6.64 (m, 2H), 6.32 (s, 1H), 5.27 (s, 1H), 5.06 (s, 1H), 4.41 (t,  $J = 8.8$  Hz, 2H), 3.58 (d,  $J = 14.8$  Hz, 1H), 3.42 (d,  $J = 15.2$  Hz, 1H), 3.13 – 3.03 (m, 3H), 2.93 – 2.86 (m, 2H), 2.84 – 2.77 (m, 1H), 2.73 – 2.67 (m, 1H), 2.61 – 2.55 (m, 1H) ppm;  $^{13}\text{C}\{^1\text{H}\}$  NMR (100 MHz, Chloroform-*d*)  $\delta$  161.4, 159.3, 148.6, 143.8, 141.0, 139.0, 135.3, 134.6, 131.8, 131.0, 130.8, 128.7, 128.1, 128.01, 127.98, 127.9, 127.2, 126.8, 126.1, 125.6, 124.6, 122.9, 120.1, 119.2, 113.3, 108.9, 71.3, 66.9, 62.1, 56.3, 51.3, 29.9, 29.6 ppm, one resonance was not observed due to overlapping peaks; **IR** (thin film): 2974, 1639, 1487, 1382, 1269, 1129, 1090, 879, 732, 654  $\text{cm}^{-1}$ ; **HRMS** calc'd for  $\text{C}_{34}\text{H}_{31}\text{N}_2\text{O}^+$  483.2431, found 483.2432  $[\text{M}+\text{H}]^+$ ; **HPLC analysis**: Daicel CHIRALPAK IA, *n*-hexane/*i*-PrOH = 98/2, flow rate = 0.5 mL/min,  $\lambda = 260$  nm, retention time:  $t_{\text{major}} = 5.64$  min,  $t_{\text{minor}} = 6.90$  min;  $[\alpha]_{\text{D}}^{20} = +36.34$  (c 1.0,  $\text{CHCl}_3$ ).

## 6. Gram-scale sequential one-pot asymmetric imine synthesis/vinylation procedure

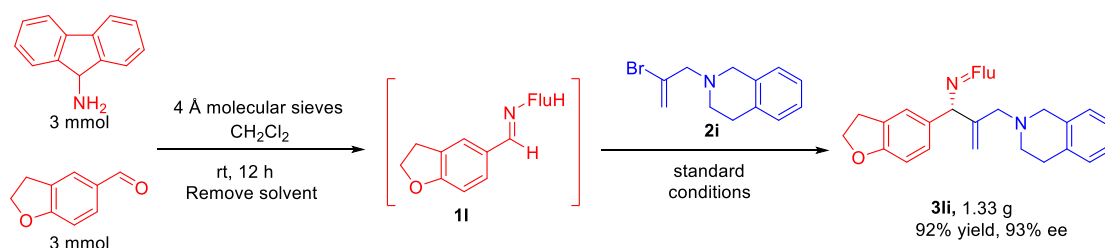

Into an oven-dried reaction Schlenk tube equipped with a magnetic stirring bar was added 9H-fluoren-9-amine (543.7 mg, 3 mmol, 1 equiv.) and 4 Å molecular sieves (1 g, powder,  $<50$   $\mu\text{M}$ ). The flask was sealed with a rubber stopper and connected to a Schlenk line through a needle. The flask was evacuated, and then refilled with nitrogen. This process was repeated twice, and the reaction flask was kept under a nitrogen atmosphere during the course of the reaction.  $\text{CH}_2\text{Cl}_2$  (15 mL) was added under nitrogen via syringe through the rubber septum. The resulting mixture was stirred at room temperature for 10 min before the 2,3-dihydrobenzofuran-5-carbaldehyde (444.5 mg, 3 mmol, 1 equiv.) was added under nitrogen via syringe through the rubber septum. The reaction was stirred at room temperature for 12 h, the solvent was completely removed in *vacuo* and the Schlenk tube was filled with nitrogen. A solution (prepared in the glove box) of  $\text{Ni}(\text{COD})_2$  (41.3 mg, 5 mol%) and **L1** (127.9 mg, 10 mol%) in 10 mL anhydrous THF was added to the Schlenk tube via syringe through the rubber septum. Then, a solution of vinyl bromide **2i** (2.27 g, 9 mmol, 3 equiv.) in 10 mL anhydrous THF was added by syringe through the rubber septum. Next, a solution of  $\text{NaN}(\text{SiMe}_3)_2$  (825.2 mg, 4.5 mmol, 1.5 equiv.) in 10 mL anhydrous THF was added by syringe through the rubber septum. The reaction mixture was stirred for 12 h in total at 25 °C, opened to air, and quenched with 5 mL of  $\text{H}_2\text{O}$ . The layers were separated and the aqueous layer was extracted with  $\text{CH}_2\text{Cl}_2$  (3X5 mL). The combined organic solution was washed by brine and dried over  $\text{Na}_2\text{SO}_4$ . The combined organic layers were concentrated in *vacuo*. The crude material was loaded onto a deactivated silica gel column via pipette and purified by flash chromatography on deactivated silica gel (eluted with hexanes to hexanes:ethyl acetate = 20:1) to give the product (1.33 g, 92% yield, 93% ee) as a yellow oil.

## 7. Transformation of the products

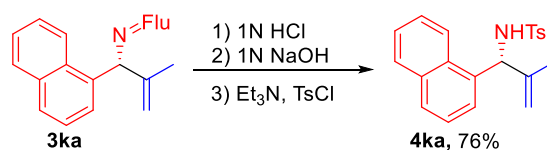

**(R)-4-Methyl-N-(2-methyl-1-(naphthalen-1-yl)allyl)benzenesulfonamide (4ka):** Compound **3ka** (143.7 mg, 0.4 mmol) was worked up following **General workup procedure for the Ni-catalyzed asymmetric alkenylation of imines with alkenyl bromides** to yield the corresponding product **4ka** (106.8 mg, 76%), which was recrystallized in EtOAc/hexanes to give crystals that were suitable for X-ray analysis.

**Mp:** 137 – 139 °C. **R<sub>f</sub>** = 0.40 (hexanes:ethyl acetate = 4:1). **<sup>1</sup>H NMR** (400 MHz, Chloroform-*d*) δ 7.81 (d, *J* = 8.0 Hz, 1H), 7.73 – 7.69 (m, 1H), 7.63 – 7.59 (m, 1H), 7.45 (dd, *J* = 6.8, 2.0 Hz, 2H), 7.39 – 7.32 (m, 2H), 7.21 – 7.16 (m, 2H), 6.95 (d, *J* = 8.0 Hz, 2H), 5.49 (d, *J* = 7.6 Hz, 1H), 5.15 (d, *J* = 8.0 Hz, 1H), 4.92 – 4.91 (m, 2H), 2.24 (s, 3H), 1.57 (s, 3H) ppm; **<sup>13</sup>C{<sup>1</sup>H} NMR** (100 MHz, Chloroform-*d*) δ 142.5, 142.0, 136.3, 133.5, 132.8, 129.8, 128.1, 127.7, 127.4, 126.0, 125.3, 124.7, 124.2, 124.1, 122.0, 112.8, 58.3, 20.4, 19.6 ppm; **IR** (thin film): 2963, 1649, 1511, 1446, 1261, 1159, 1019, 907, 798, 670 cm<sup>-1</sup>; **HRMS** calc'd for C<sub>21</sub>H<sub>21</sub>NNaO<sub>2</sub>S<sup>+</sup> 374.1185, found 374.1188 [M+Na]<sup>+</sup>; [α]<sub>D</sub><sup>20</sup> = +8.25 (c 1.0, CHCl<sub>3</sub>).

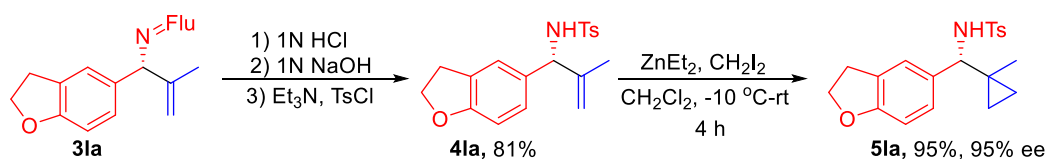

**(R)-N-(1-(2,3-Dihydrobenzofuran-5-yl)-2-methylallyl)-4-methylbenzenesulfonamide (4la):** Compound **3la** (140.5 mg, 0.4 mmol) was worked up following **General workup procedure for the Ni-catalyzed asymmetric alkenylation of imines with alkenyl bromides** to yield the corresponding product **4la** (111.3 mg, 81%) as a colorless oil. **R<sub>f</sub>** = 0.33 (hexanes:ethyl acetate = 4:1). **<sup>1</sup>H NMR** (400 MHz, Chloroform-*d*) δ 7.54 (d, *J* = 8.4 Hz, 2H), 7.11 (d, *J* = 8.4 Hz, 2H), 6.78 (s, 1H), 6.71 (dd, *J* = 8.4, 2.0 Hz, 1H), 6.50 (d, *J* = 8.0 Hz, 1H), 5.12 (d, *J* = 7.2 Hz, 1H), 4.91 (d, *J* = 1.2 Hz, 1H), 4.80 (dd, *J* = 3.2, 1.2 Hz, 1H), 4.66 (d, *J* = 7.2 Hz, 1H), 4.42 (td, *J* = 8.8, 1.2 Hz, 2H), 3.03 – 2.88 (m, 2H), 2.32 (s, 3H), 1.47 (s, 3H) ppm; **<sup>13</sup>C{<sup>1</sup>H} NMR** (100 MHz, Chloroform-*d*) δ 159.6, 143.8, 143.0, 137.7, 131.1, 129.3, 127.3, 127.3, 127.1, 123.7, 112.8, 109.0, 71.4, 62.5, 29.5, 21.5, 19.7 ppm; **IR** (thin film): 2921, 1598, 1491, 1326, 1160, 1094, 982, 770, 670 cm<sup>-1</sup>; **HRMS** calc'd for C<sub>19</sub>H<sub>21</sub>NNaO<sub>3</sub>S<sup>+</sup> 366.1134, found 366.1131 [M+Na]<sup>+</sup>; [α]<sub>D</sub><sup>20</sup> = +85.39 (c 1.0, CHCl<sub>3</sub>).

**(R)-N-((2,3-Dihydrobenzofuran-5-yl)(1-methylcyclopropyl)methyl)-4-methylbenzenesulfonamide (5la):** The procedure reported by Charette was followed.<sup>[4]</sup> To a solution of compound **4la** (68.7 mg, 0.2 mmol) under a nitrogen atmosphere in CH<sub>2</sub>Cl<sub>2</sub> (3.0 mL) at -10 °C, Et<sub>2</sub>Zn (1 mL, 1.0 M in hexane, 1 mmol, 5.0 equiv.) and CH<sub>2</sub>I<sub>2</sub> (267.6 mg, 1 mmol, 5.0 equiv.) were added sequentially. The resulting mixture was stirred for 3 h then the temperature was allowed to rise to room temperature. The mixture was stirred for 1 h at room temperature. The mixture was then diluted with Et<sub>2</sub>O (50 mL) and HCl (10% aq., 5 mL) was added. The layers were separated and the organic layer was washed with saturated NaHCO<sub>3</sub> (10 mL), brine (10 mL), dried over Na<sub>2</sub>SO<sub>4</sub> and filtered. The volatile materials were removed under vacuum and the resulting residue was purified by flash column chromatography (hexanes:EtOAc

= 6:1) to afford **5la** (67.9 mg, 95% yield, 95% *ee*) as a colorless oil.

$R_f$  = 0.33 (hexanes:ethyl acetate = 4:1).  $^1\text{H NMR}$  (400 MHz, Chloroform-*d*)  $\delta$  7.51 (d,  $J$  = 8.0 Hz, 2H), 7.07 (d,  $J$  = 8.4 Hz, 2H), 6.76 (s, 1H), 6.73 (dd,  $J$  = 8.4, 2.0 Hz, 1H), 6.48 (d,  $J$  = 8.0 Hz, 1H), 5.37 (d,  $J$  = 6.4 Hz, 1H), 4.46 – 4.37 (m, 2H), 3.75 (d,  $J$  = 6.8 Hz, 1H), 3.03 – 2.92 (m, 2H), 2.30 (s, 3H), 0.84 (s, 3H), 0.53 – 0.48 (m, 1H), 0.27 – 0.15 (m, 3H) ppm;  $^{13}\text{C}\{^1\text{H}\}$  NMR (100 MHz, Chloroform-*d*)  $\delta$  158.1, 141.8, 136.6, 130.3, 128.1, 126.2, 126.1, 125.6, 122.7, 107.5, 70.2, 63.1, 28.6, 20.4, 19.7, 18.8, 11.0, 10.5 ppm; IR (thin film): 2963, 1599, 1493, 1323, 1244, 1159, 1094, 983, 813, 757, 665  $\text{cm}^{-1}$ ; HRMS calc'd for  $\text{C}_{20}\text{H}_{23}\text{NNaO}_3\text{S}^+$  380.1291, found 380.1287  $[\text{M}+\text{Na}]^+$ ; HPLC analysis: Daicel CHIRALPAK AD-H, *n*-hexane/*i*-PrOH = 95/5, flow rate = 1 mL/min,  $\lambda$  = 254 nm, retention time:  $t_{\text{major}}$  = 34.87 min,  $t_{\text{minor}}$  = 39.37 min;  $[\alpha]_{\text{D}}^{20}$  = +54.58 (c 1.0,  $\text{CHCl}_3$ ).

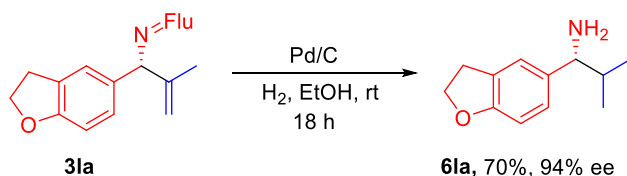

**(R)-1-(2,3-Dihydrobenzofuran-5-yl)-2-methylpropan-1-amine (6la)**: Following a procedure reported by Charette,<sup>[5]</sup> a 25 mL round-bottom flask was charged with **3la** (70.4 mg, 0.20 mmol, 1.0 equiv.) and EtOH (3.5 mL), followed by 10% Pd/C (0.020 mmol, 10 mol%). After purging the flask with hydrogen, the solution was stirred for 18 hours at ambient temperature. After consumption of starting material was confirmed by TLC analysis, the reaction mixture was filtered. Next, the combined organic layers were concentrated in *vacuo* and purified by flash column chromatography (EtOAc:Et<sub>3</sub>N = 100:1) to afford **6la** (26.8 mg, 70% yield, 94% *ee*) as a colorless oil.

$R_f$  = 0.38 (EtOAc:MeOH = 10:1).  $^1\text{H NMR}$  (400 MHz, Chloroform-*d*)  $\delta$  7.13 (s, 1H), 6.98 (d,  $J$  = 8.0 Hz, 1H), 6.70 (d,  $J$  = 8.0 Hz, 1H), 4.53 (t,  $J$  = 8.4 Hz, 2H), 3.51 (d,  $J$  = 7.6 Hz, 1H), 3.17 (t,  $J$  = 8.4 Hz, 2H), 1.83 – 1.74 (m, 1H), 1.56 (s, 2H), 0.96 (d,  $J$  = 6.4 Hz, 3H), 0.74 (d,  $J$  = 6.8 Hz, 3H) ppm;  $^{13}\text{C}\{^1\text{H}\}$  NMR (100 MHz, Chloroform-*d*)  $\delta$  159.0, 137.6, 126.8, 126.8, 123.4, 108.6, 71.2, 62.2, 35.6, 29.8, 19.9, 19.2 ppm; IR (thin film): 2957, 1612, 1491, 1363, 1237, 1097, 984, 812  $\text{cm}^{-1}$ ; HRMS calc'd for  $\text{C}_{12}\text{H}_{18}\text{NO}^+$  192.1383, found 192.1384  $[\text{M}+\text{H}]^+$ ; HPLC analysis: Daicel CHIRALPAK IE, *n*-hexane/*i*-PrOH = 75/25, flow rate = 0.5 mL/min,  $\lambda$  = 260 nm, retention time:  $t_{\text{major}}$  = 36.23 min,  $t_{\text{minor}}$  = 33.59 min;  $[\alpha]_{\text{D}}^{20}$  = +12.00 (c 1.0,  $\text{CHCl}_3$ ).



## 8. Reaction time course study of coupling between **1n** and **2a** (Table S6)

Experiments were set up inside a glovebox under a nitrogen atmosphere. Imine (**1n** 0.1 mmol/reaction) and vinyl bromide (**2a**, 0.3 mmol/reaction) were dosed together into 2 mL crimp top glass vials. A stock solution containing Ni(COD)<sub>2</sub> (0.005 mmol/reaction) and **L1** (0.01 mmol/reaction) in 0.5 mL of dry THF was taken up by syringe and added to the reaction vial under nitrogen. Then, NaN(SiMe<sub>3</sub>)<sub>2</sub> (0.15 mmol/reaction) in 0.5 mL of dry THF was added to the reaction mixture. Total volume of the reactions is 1 mL, 0.1 M. The vials were sealed with crimp caps, removed from the glovebox and stirred at 25 °C. Vials were sequentially quenched with 1 drop of water via syringe through the rubber septum at every 3 h until 12 h. The crude product was separated by flash chromatography on deactivated silica gel (hexanes to hexanes:ethyl acetate = 100:1). Further purification was performed on an Agilent HPLC 1260 system using acetonitrile:H<sub>2</sub>O (90:10 vol./vol.) as mobile phase and flow rate of 5 mL/min with monitoring at 254 nm to give the yield of product **3na**. The ee of product **3na** was obtained by chiral phase HPLC.

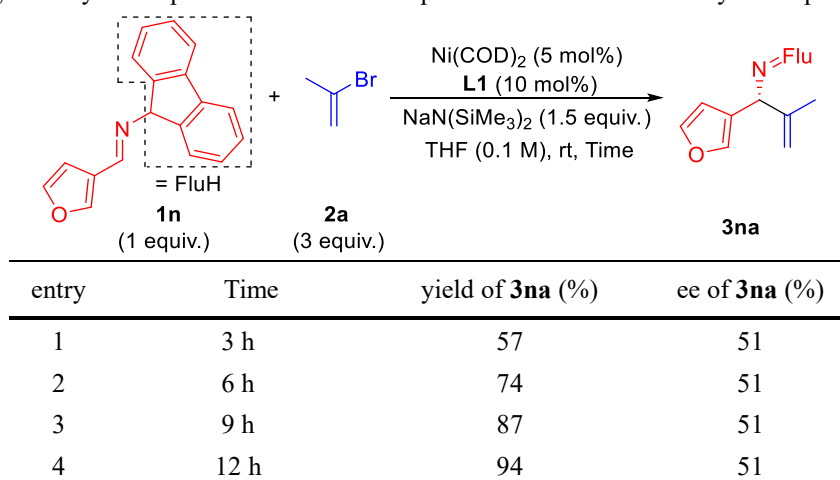

## 9. X-ray crystal structure of compound 4ka

Crystal data for **4ka**:  $C_{21}H_{21}NO_2S$ ,  $M = 351.45$ ,  $a = 6.5212(3) \text{ \AA}$ ,  $b = 19.5200(8) \text{ \AA}$ ,  $c = 27.5641(12) \text{ \AA}$ ,  $\alpha = 90^\circ$ ,  $\beta = 90^\circ$ ,  $\gamma = 90^\circ$ ,  $V = 3508.7(3) \text{ \AA}^3$ ,  $T = 100.(2) \text{ K}$ , space group  $P2_12_12_1$ ,  $Z = 8$ ,  $\mu(\text{Cu K}\alpha) = 1.745 \text{ mm}^{-1}$ , 35118 reflections measured, 6901 independent reflections ( $R_{int} = 0.1480$ ). The final  $R_I$  values were 0.0497 ( $I > 2\sigma(I)$ ). The final  $wR(F^2)$  values were 0.1227 ( $I > 2\sigma(I)$ ). The final  $R_I$  values were 0.0713 (all data). The final  $wR(F^2)$  values were 0.1379 (all data). The goodness of fit on  $F^2$  was 1.066. Flack parameter = 0.067(12).

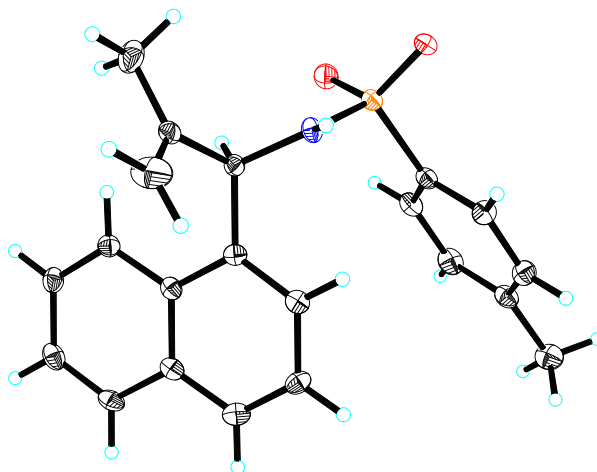

Figure S1. Crystal structure of **4ka** (CCDC 2058299)

### Crystal data and structure refinement for **4ka**.

|                                 |                                                                  |                     |
|---------------------------------|------------------------------------------------------------------|---------------------|
| Identification code             | <b>4ka</b>                                                       |                     |
| Empirical formula               | $C_{21}H_{21}NO_2S$                                              |                     |
| Formula weight                  | 351.45                                                           |                     |
| Temperature                     | 100(2) K                                                         |                     |
| Wavelength                      | 1.54178 $\text{\AA}$                                             |                     |
| Crystal system                  | Orthorhombic                                                     |                     |
| Space group                     | $P2_12_12_1$                                                     |                     |
| Unit cell dimensions            | $a = 6.5212(3) \text{ \AA}$                                      | $\alpha = 90^\circ$ |
|                                 | $b = 19.5200(8) \text{ \AA}$                                     | $\beta = 90^\circ$  |
|                                 | $c = 27.5641(12) \text{ \AA}$                                    | $\gamma = 90^\circ$ |
| Volume                          | $3508.7(3) \text{ \AA}^3$                                        |                     |
| Z                               | 8                                                                |                     |
| Density (calculated)            | 1.331 $\text{Mg/m}^3$                                            |                     |
| Absorption coefficient          | $1.745 \text{ mm}^{-1}$                                          |                     |
| F(000)                          | 1488                                                             |                     |
| Crystal size                    | $0.290 \times 0.070 \times 0.060 \text{ mm}^3$                   |                     |
| Theta range for data collection | $2.77$ to $72.55^\circ$                                          |                     |
| Index ranges                    | $-8 \leq h \leq 8$ , $-24 \leq k \leq 24$ , $-34 \leq l \leq 24$ |                     |
| Reflections collected           | 35118                                                            |                     |
| Independent reflections         | 6901 [ $R_{int} = 0.1480$ ]                                      |                     |

|                                   |                                             |
|-----------------------------------|---------------------------------------------|
| Completeness to theta = 72.55 °   | 99.5 %                                      |
| Absorption correction             | Semi-empirical from equivalents             |
| Max. and min. transmission        | 0.90 and 0.45                               |
| Refinement method                 | Full-matrix least-squares on F <sup>2</sup> |
| Data / restraints / parameters    | 6901 / 0 / 455                              |
| Goodness-of-fit on F <sup>2</sup> | 1.066                                       |
| Final R indices [I>2sigma(I)]     | R1 = 0.0497, wR2 = 0.1227                   |
| R indices (all data)              | R1 = 0.0713, wR2 = 0.1379                   |
| Absolute structure parameter      | 0.067(12)                                   |
| Largest diff. peak and hole       | 0.328 and -0.693 e.Å <sup>-3</sup>          |

## 10. Supplementary references

- [1] Y. Zhu, S. L. Buchwald, *J. Am. Chem. Soc.* **2014**, 136, 4500–4503.
- [2] J. Liu, C. G. Cao, H. B. Sun, X. Zhang, D. Niu, *J. Am. Chem. Soc.* **2016**, 138, 13103–13106.
- [3] J. J. Molloy, C. P. Seath, M. J. West, C. Mclaughlin, N. J. Fazakerley, A. R. Kennedy, D. J. Nelson, A. J. B. Watson, *J. Am. Chem. Soc.* **2018**, 140, 126–130.
- [4] Sergio Mata, Luis A. López, Rubén Vicente, *Angew. Chem. Int. Ed.* **2018**, 57, 11422–11426.
- [5] Y. Matsumoto, J. Sawamura, Y. Murata, T. Nishikata, R. Yazaki, *J. Am. Chem. Soc.* **2020**, 142, 8498–8505.

## 11. NMR Spectra and HPLC chromatography of the products

**Figure S1.**  $^1\text{H}$  NMR spectra (400 MHz, Chloroform-*d*) of (*E*)-*N*-(9*H*-Fluoren-9-yl)-1-(4-fluorophenyl)methanimine (**1c**).

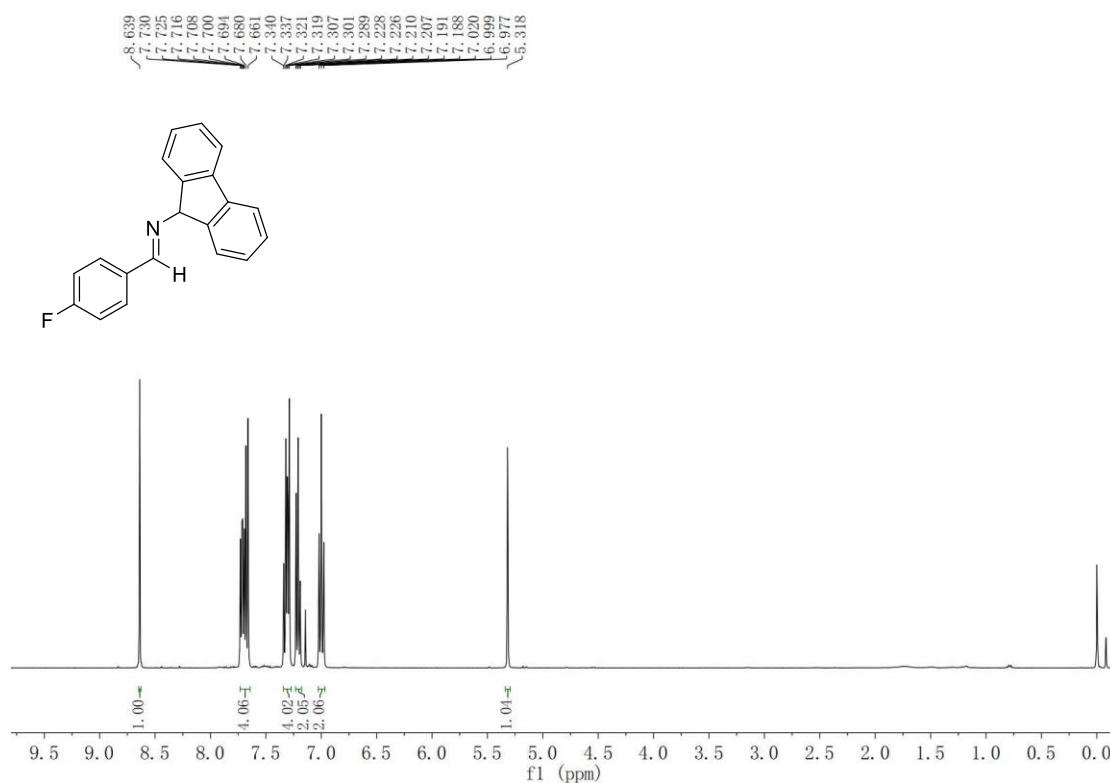

**Figure S2.**  $^{13}\text{C}\{^1\text{H}\}$  NMR spectra (100 MHz, Chloroform-*d*) of (*E*)-*N*-(9*H*-Fluoren-9-yl)-1-(4-fluorophenyl)methanimine (**1c**).

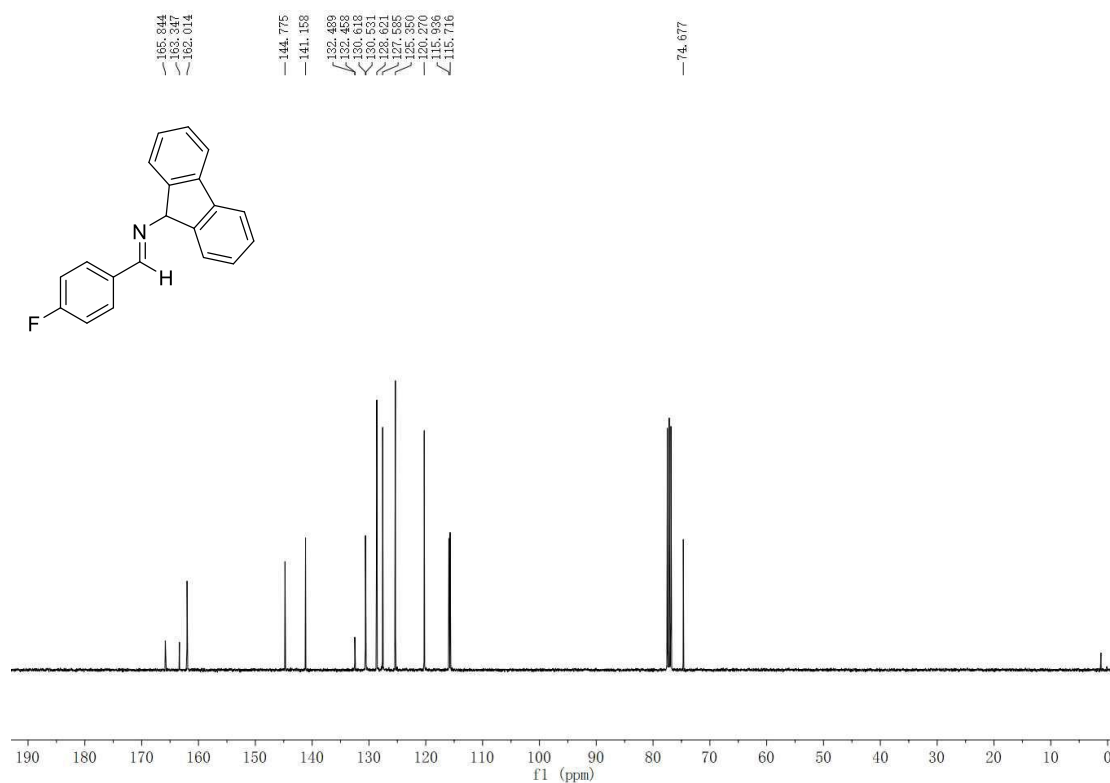

**Figure S3.**  $^{19}\text{F}$  NMR spectra (376 MHz, Chloroform-*d*) of (*E*)-*N*-(9*H*-Fluoren-9-yl)-1-(4-fluorophenyl)methanimine (**1c**).

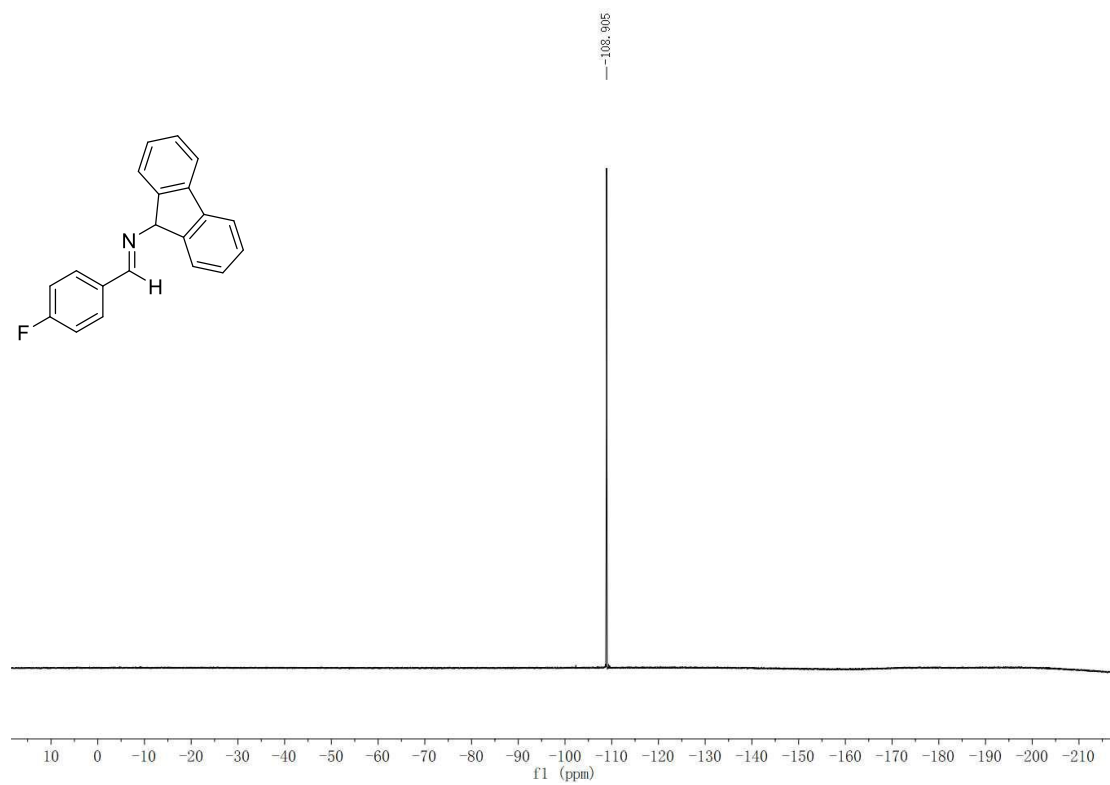

**Figure S4.**  $^1\text{H}$  NMR spectra (400 MHz, Chloroform- $d$ ) of (*E*)-1-(4-*tert*-Butylphenyl)-*N*-(9H-fluoren-9-yl)methanimine (**1f**).

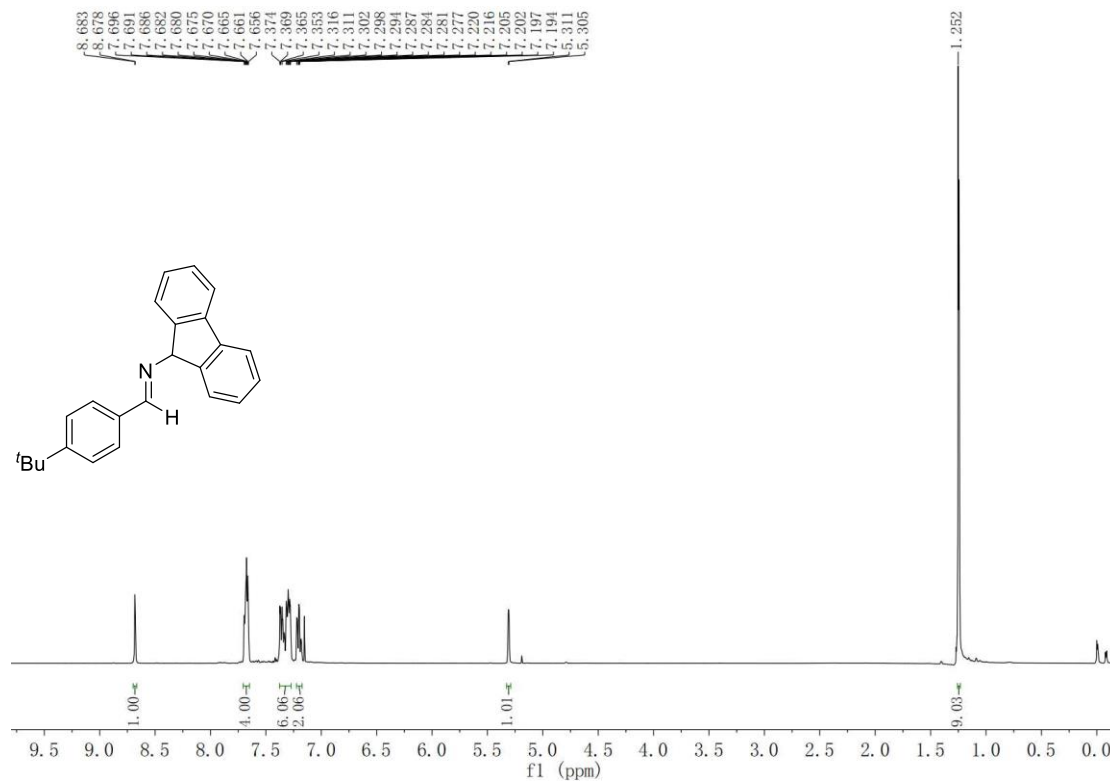

**Figure S5.**  $^{13}\text{C}\{^1\text{H}\}$  NMR spectra (100 MHz, Chloroform- $d$ ) of (*E*)-1-(4-*tert*-Butylphenyl)-*N*-(9H-fluoren-9-yl)methanimine (**1f**).

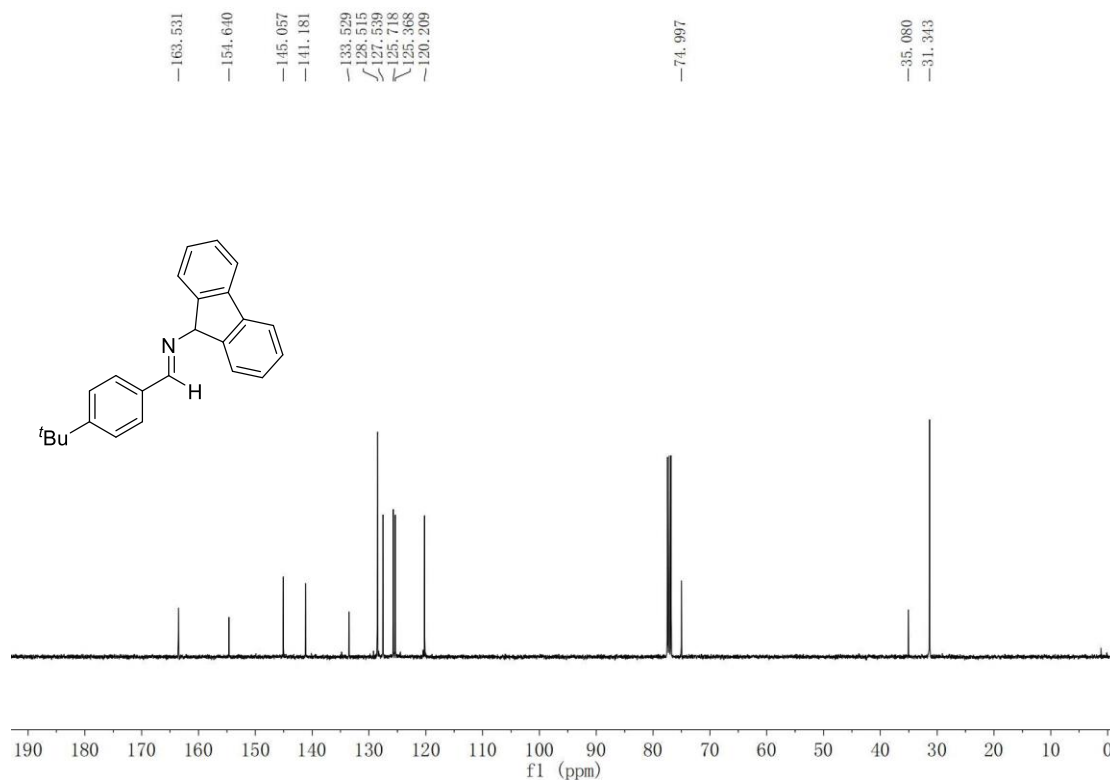

**Figure S6.**  $^1\text{H}$  NMR spectra (400 MHz, Chloroform-*d*) of (*E*)-1-([1,1'-Biphenyl]-4-yl)-*N*-(9H-fluoren-9-yl)methanimine (**1g**).

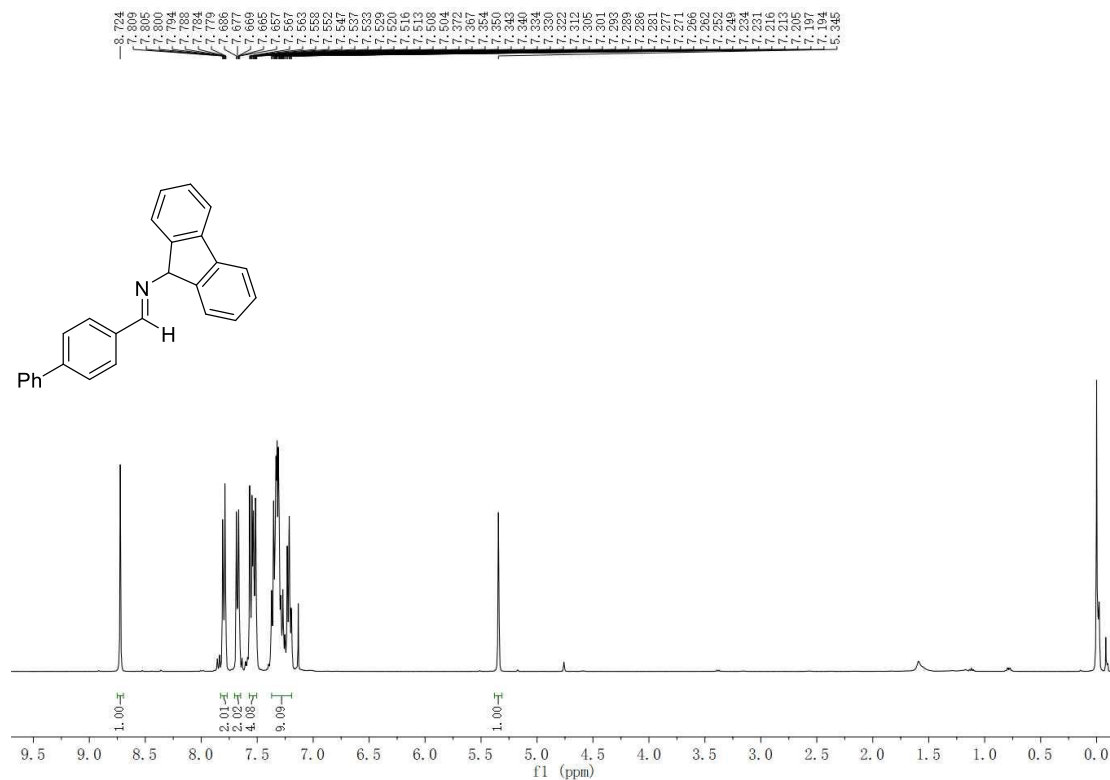

**Figure S7.**  $^{13}\text{C}\{^1\text{H}\}$  NMR spectra (100 MHz, Chloroform-*d*) of (*E*)-1-([1,1'-Biphenyl]-4-yl)-*N*-(9H-fluoren-9-yl)methanimine (**1g**).

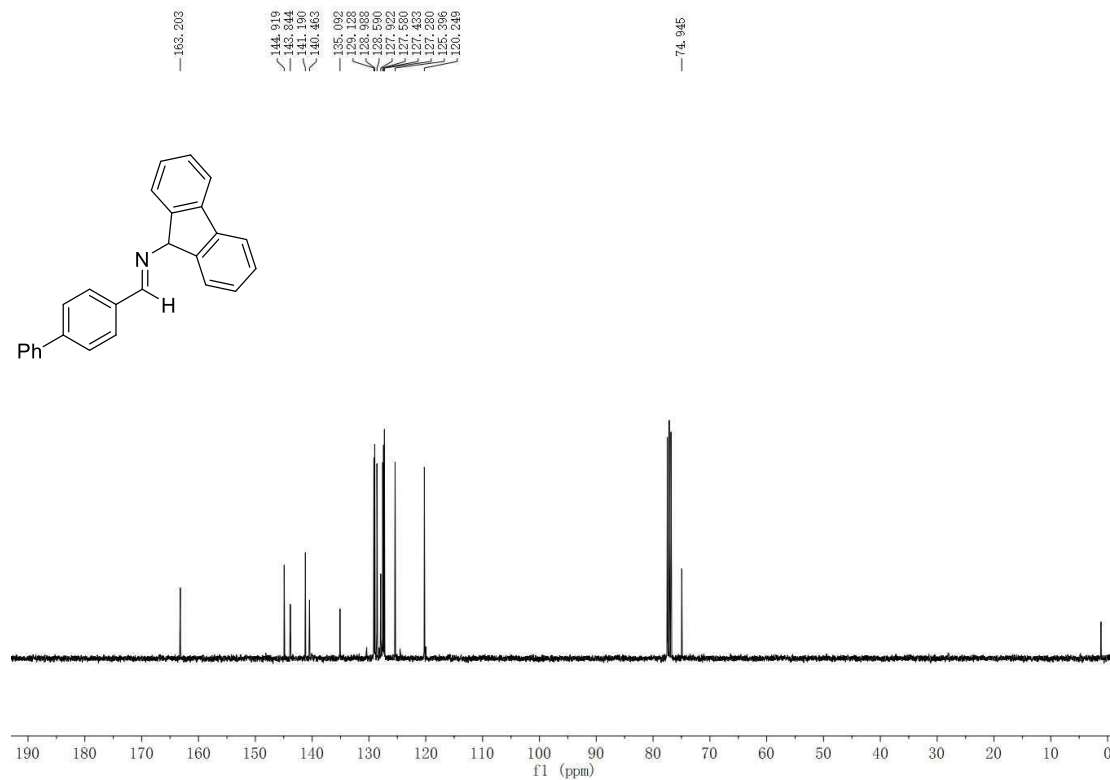



**Figure S8.**  $^1\text{H}$  NMR spectra (400 MHz, Chloroform-*d*) of (*E*)-*N*-(9*H*-Fluoren-9-yl)-1-(3-(trifluoromethoxy)phenyl)methanimine (**1h**).

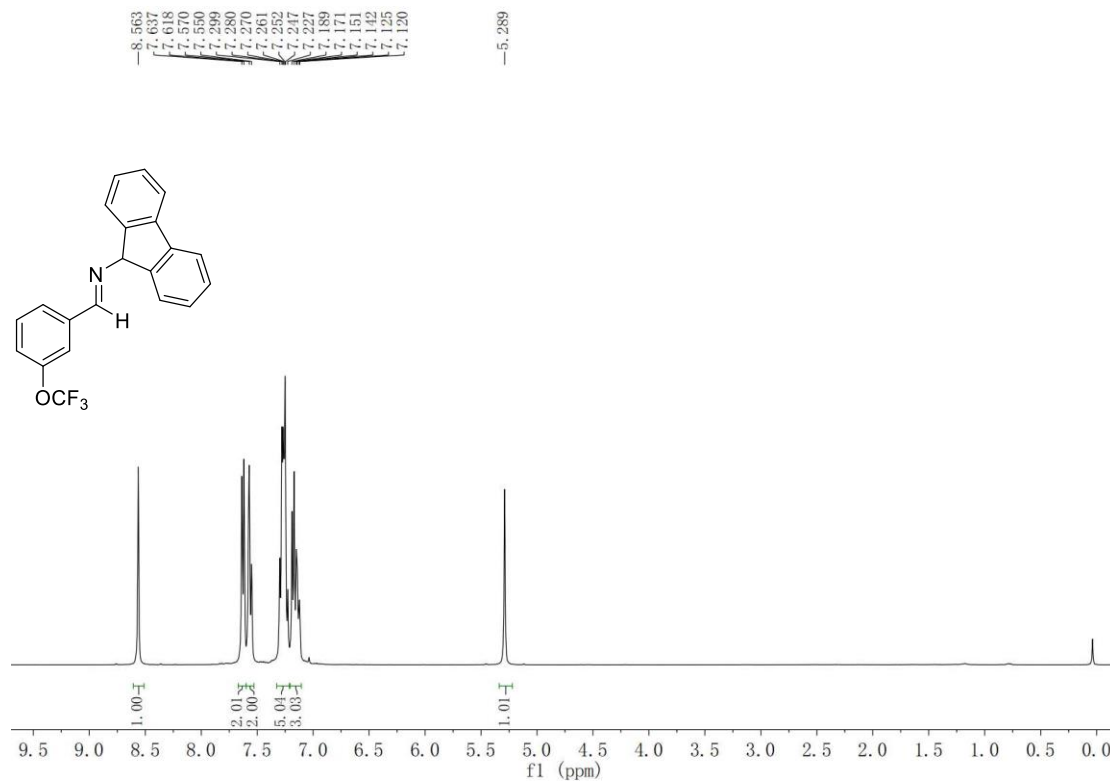

**Figure S9.**  $^{13}\text{C}\{^1\text{H}\}$  NMR spectra (100 MHz, Chloroform-*d*) of (*E*)-*N*-(9*H*-Fluoren-9-yl)-1-(3-(trifluoromethoxy)phenyl)methanimine (**1h**).

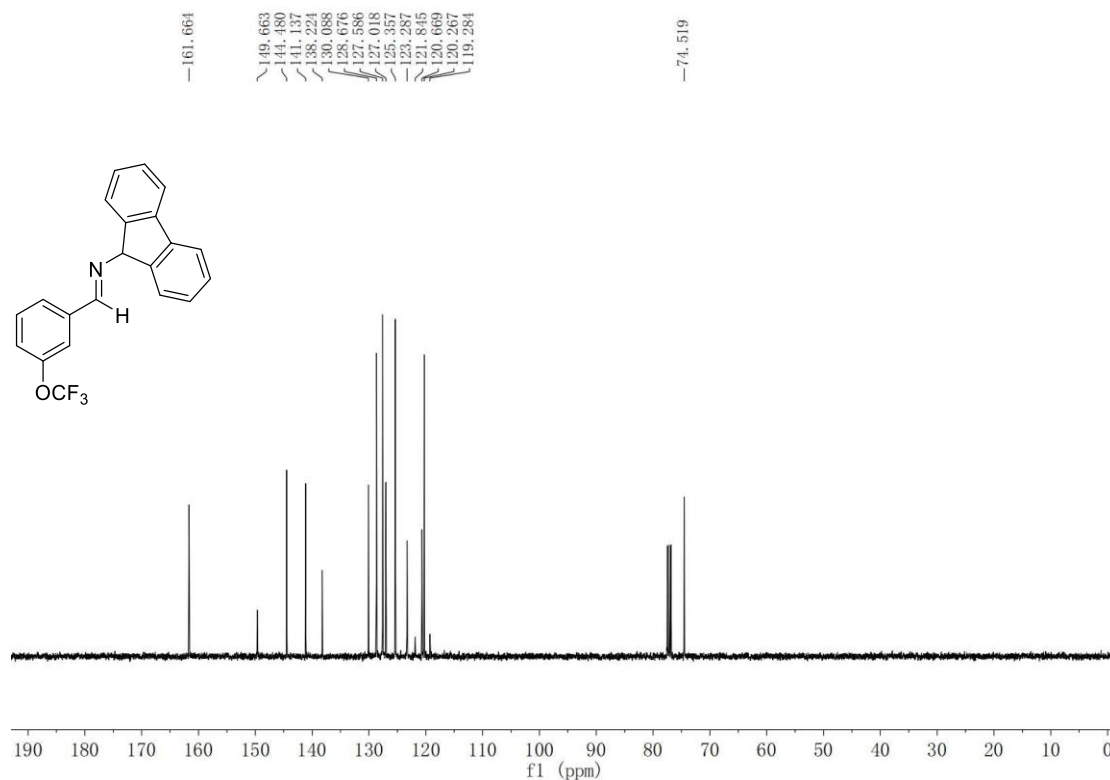

**Figure S10.**  $^{19}\text{F}$  NMR spectra (376 MHz, Chloroform-*d*) of (*E*)-*N*-(9*H*-Fluoren-9-yl)-1-(3-(trifluoromethoxy)phenyl)methanimine (**1h**).

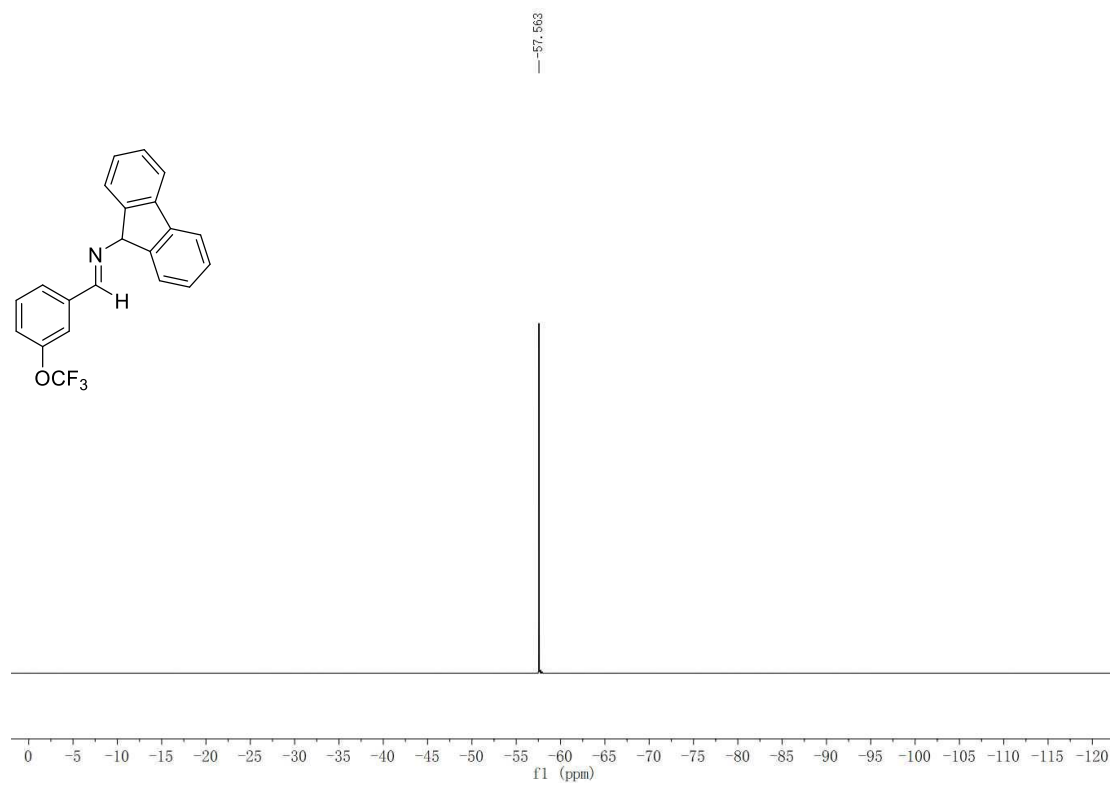

**Figure S11.**  $^1\text{H}$  NMR spectra (400 MHz, Chloroform- $d$ ) of (*E*)-1-(3,4-Dimethoxyphenyl)-*N*-(9H-fluoren-9-yl)methanimine (**1i**).

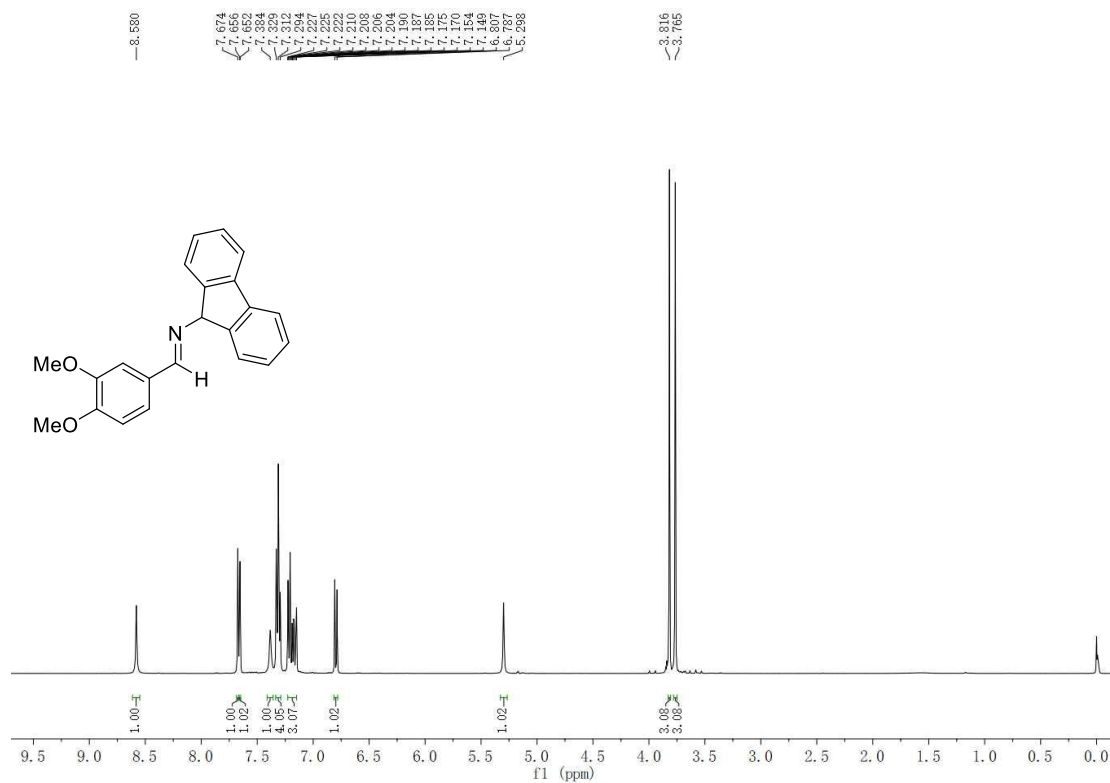

**Figure S12.**  $^{13}\text{C}\{^1\text{H}\}$  NMR spectra (100 MHz, Chloroform- $d$ ) of (*E*)-1-(3,4-Dimethoxyphenyl)-*N*-(9H-fluoren-9-yl)methanimine (**1i**).

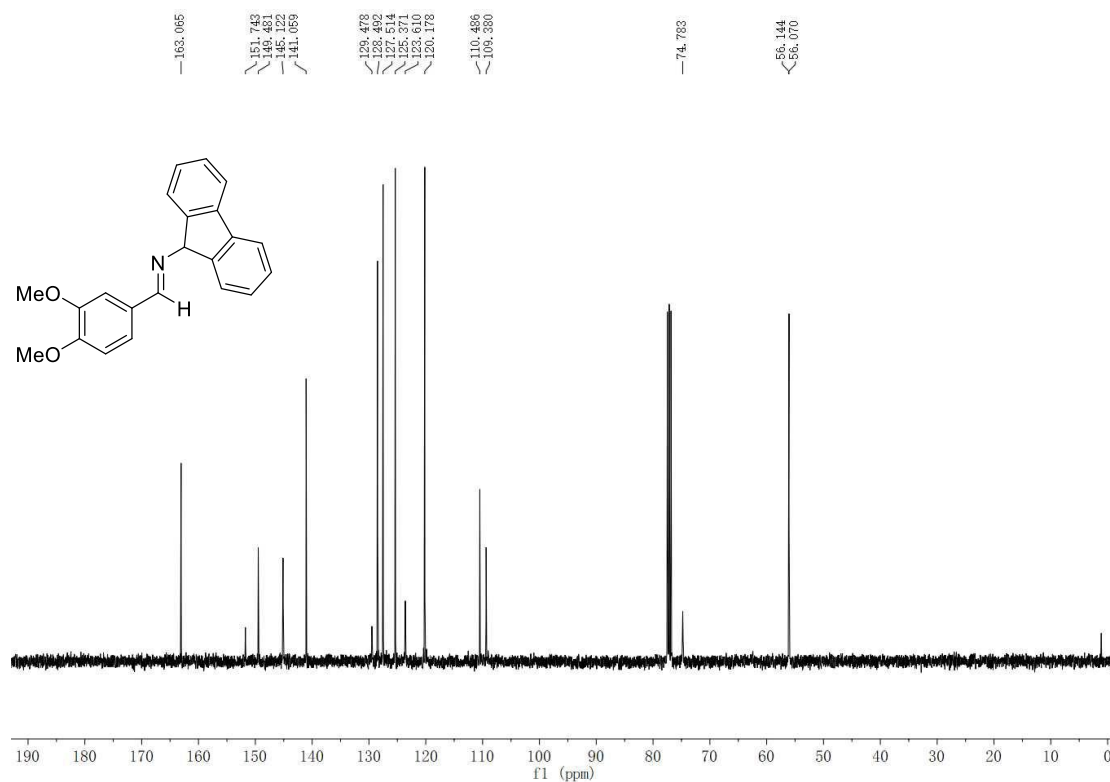

**Figure S13.**  $^1\text{H}$  NMR spectra (400 MHz, Chloroform- $d$ ) of (*E*)-*N*-(9*H*-Fluoren-9-yl)-1-(*o*-tolyl) methanimine (**1j**).

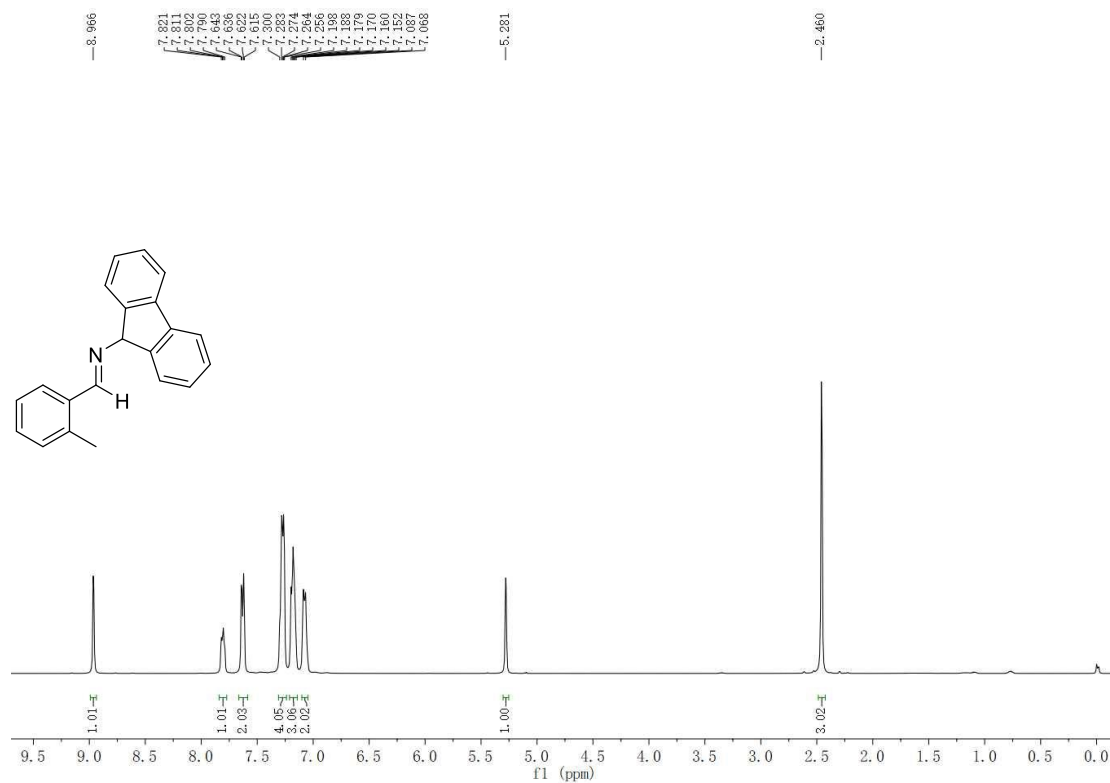

**Figure S14.**  $^{13}\text{C}\{^1\text{H}\}$  NMR spectra (100 MHz, Chloroform- $d$ ) of (*E*)-*N*-(9*H*-Fluoren-9-yl)-1-(*o*-tolyl) methanimine (**1j**).

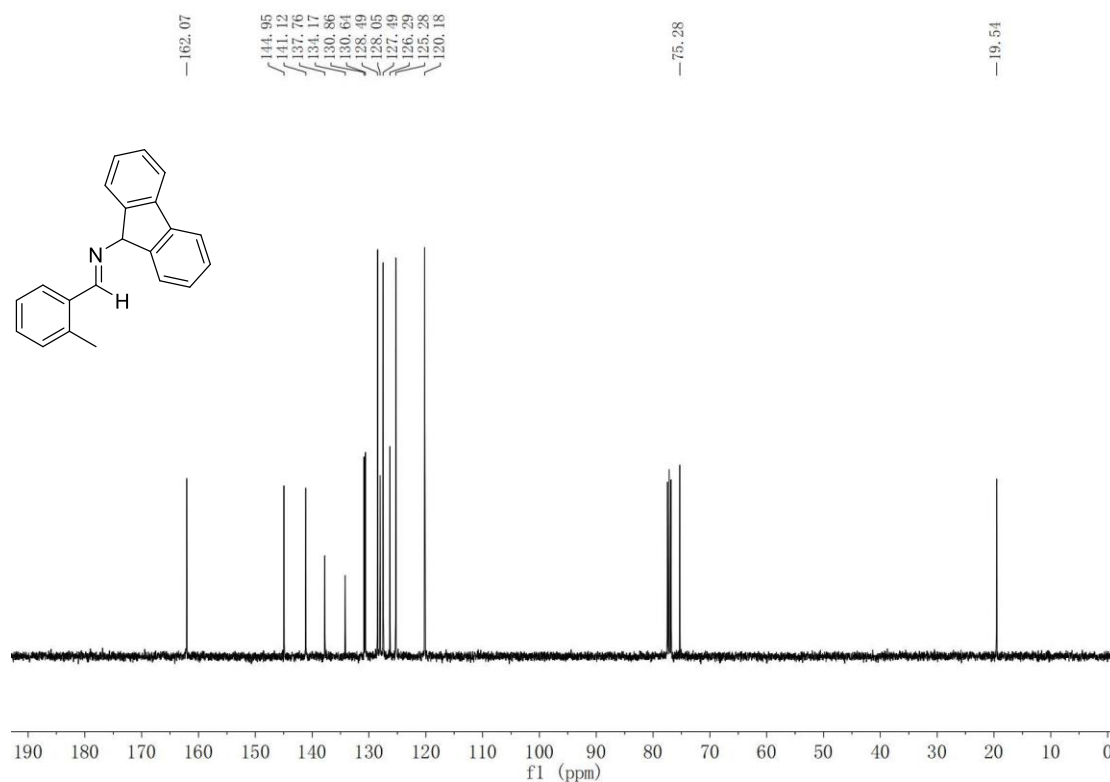

**Figure S15.  $^1\text{H}$  NMR spectra (400 MHz, Chloroform-*d*) of (*E*)-*N*-(9*H*-Fluoren-9-yl)-1-(naphthalen-1-yl)methanimine (**1k**).**

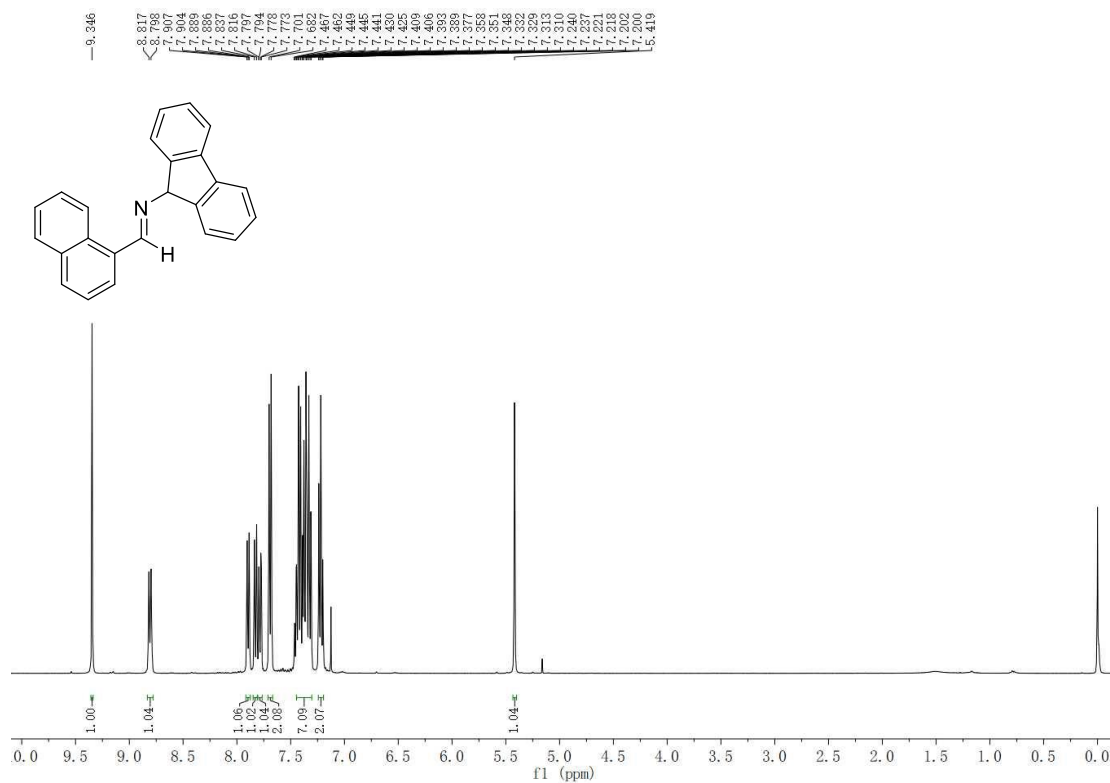

**Figure S16.  $^{13}\text{C}\{^1\text{H}\}$  NMR spectra (100 MHz, Chloroform-*d*) of (*E*)-*N*-(9*H*-Fluoren-9-yl)-1-(naphthalen-1-yl)methanimine (**1k**).**

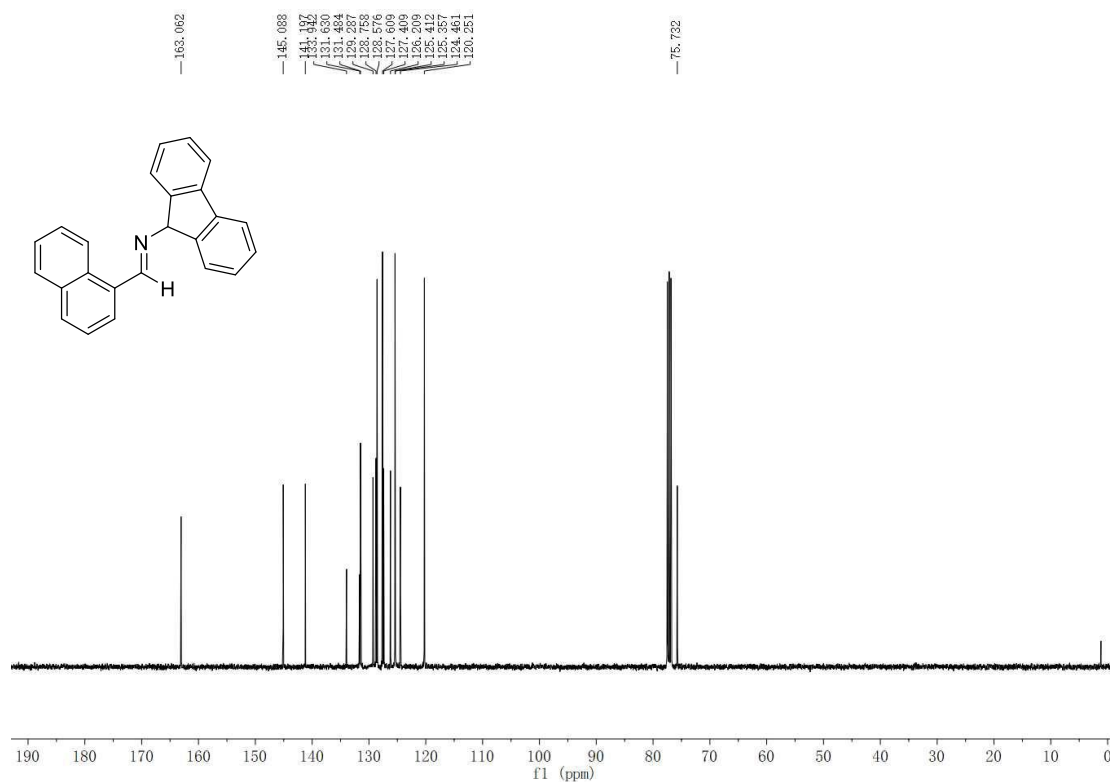

**Figure S17.**  $^1\text{H}$  NMR spectra (400 MHz, Chloroform-*d*) of (*E*)-1-(2,3-Dihydrobenzofuran-5-yl)-*N*-(9*H*-fluoren-9-yl)methanimine (**11**).

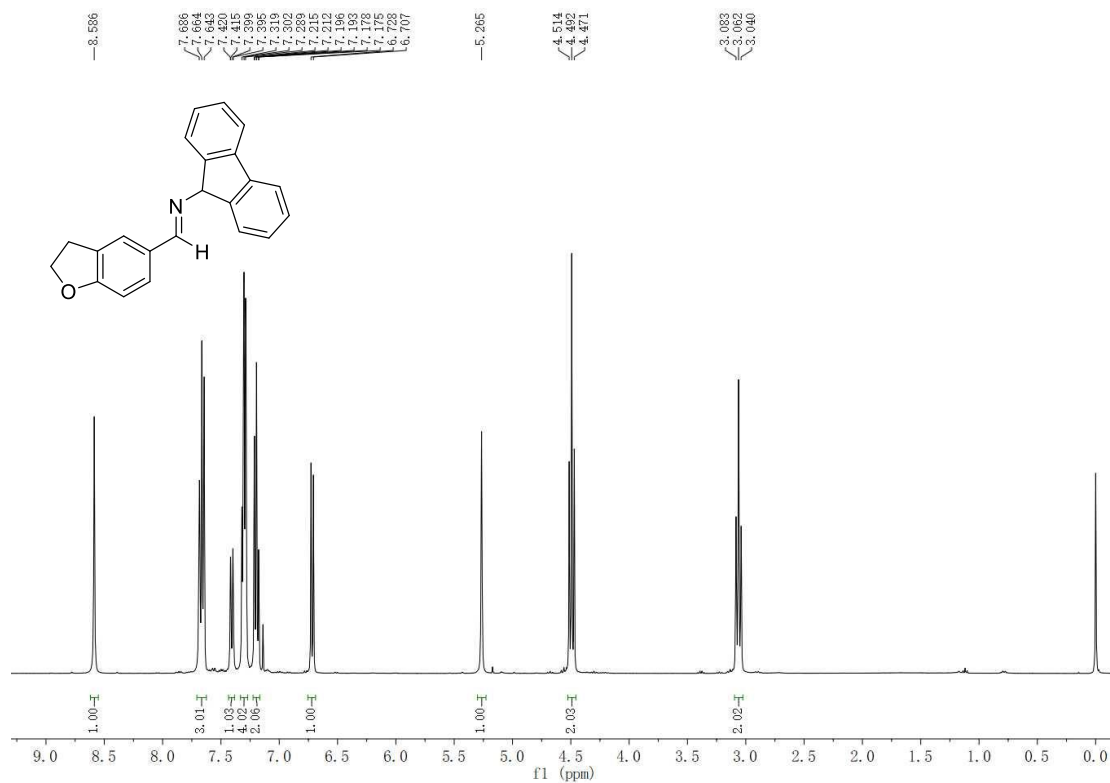

**Figure S18.**  $^{13}\text{C}\{^1\text{H}\}$  NMR spectra (100 MHz, Chloroform-*d*) of (*E*)-1-(2,3-Dihydrobenzofuran-5-yl)-*N*-(9*H*-fluoren-9-yl)methanimine (**11**).

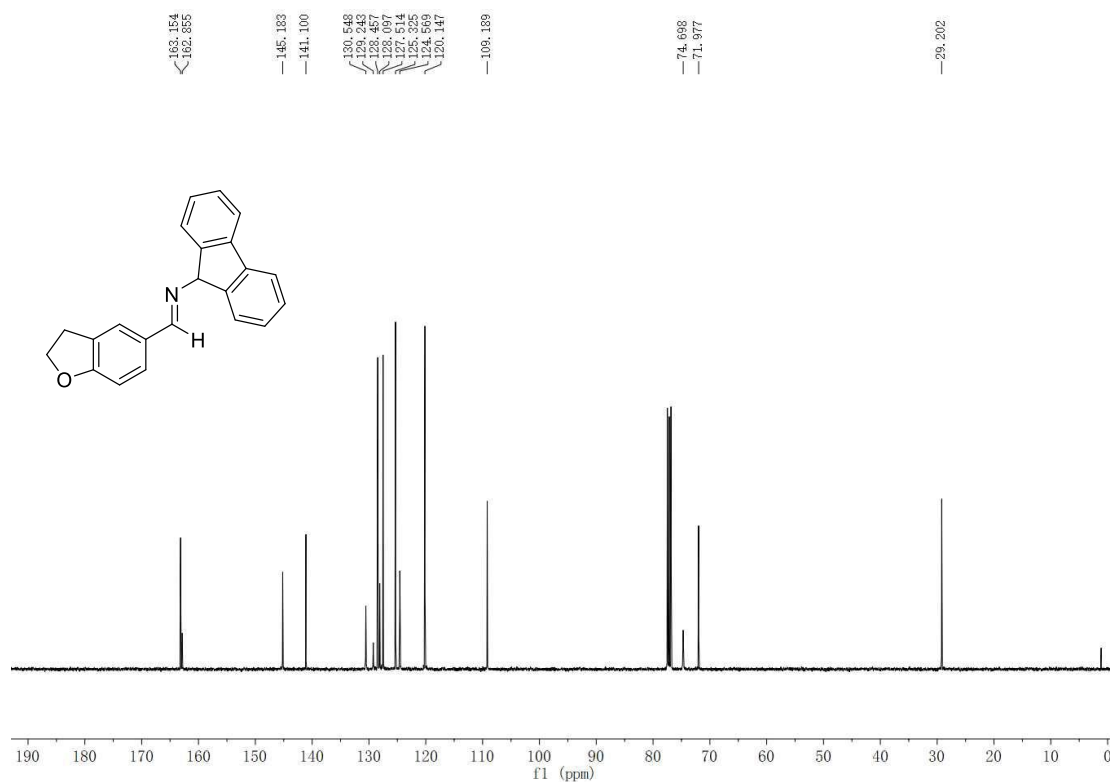

**Figure S19.**  $^1\text{H}$  NMR spectra (400 MHz, Chloroform-*d*) of (*E*)-1-(2,6-Dimethoxypyridin-3-yl)-*N*-(9*H*-fluoren-9-yl)methanimine (**1m**).

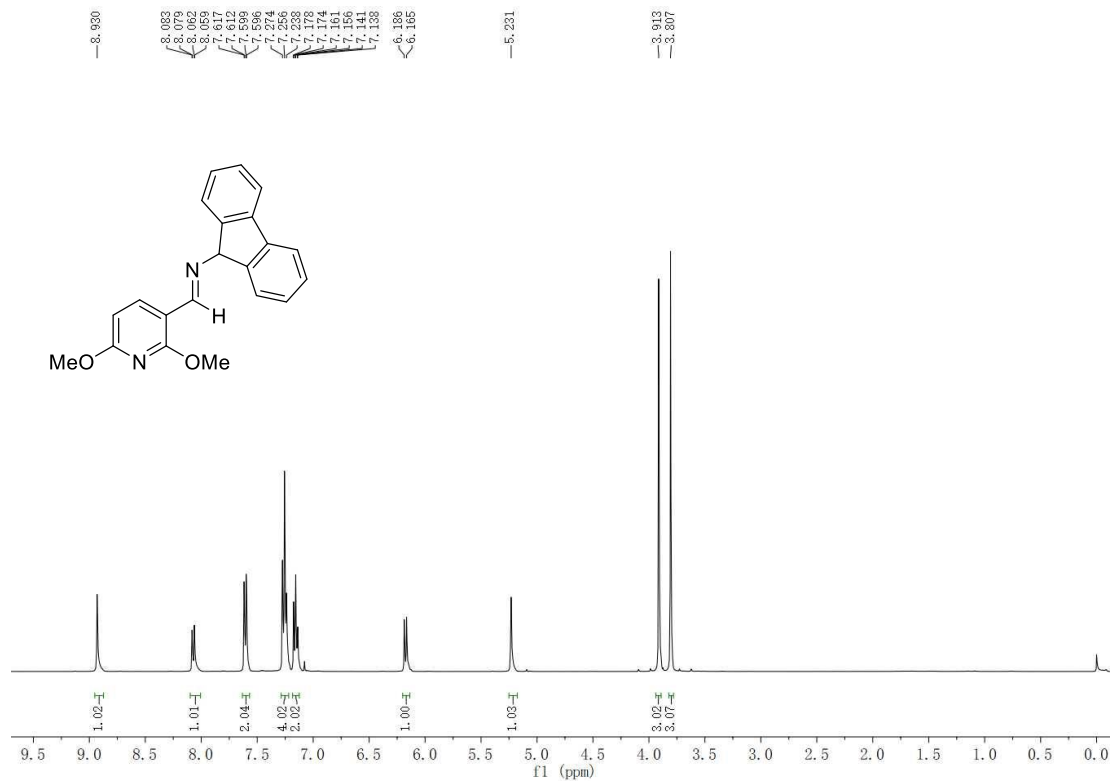

**Figure S20.**  $^{13}\text{C}\{^1\text{H}\}$  NMR spectra (100 MHz, Chloroform-*d*) of (*E*)-1-(2,6-Dimethoxypyridin-3-yl)-*N*-(9*H*-fluoren-9-yl)methanimine (**1m**).

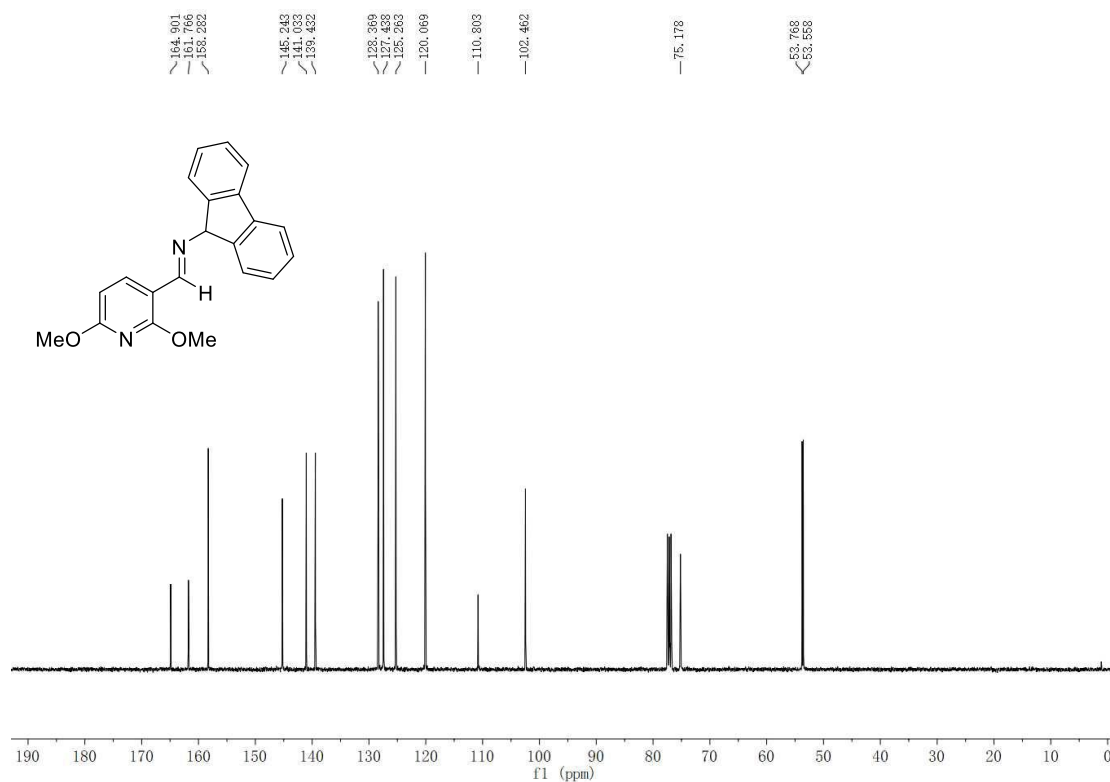

Figure S21.  $^1\text{H}$  NMR spectra (400 MHz, Chloroform-*d*) of 1-(2-Bromoallyl)pyrrolidine (2g).

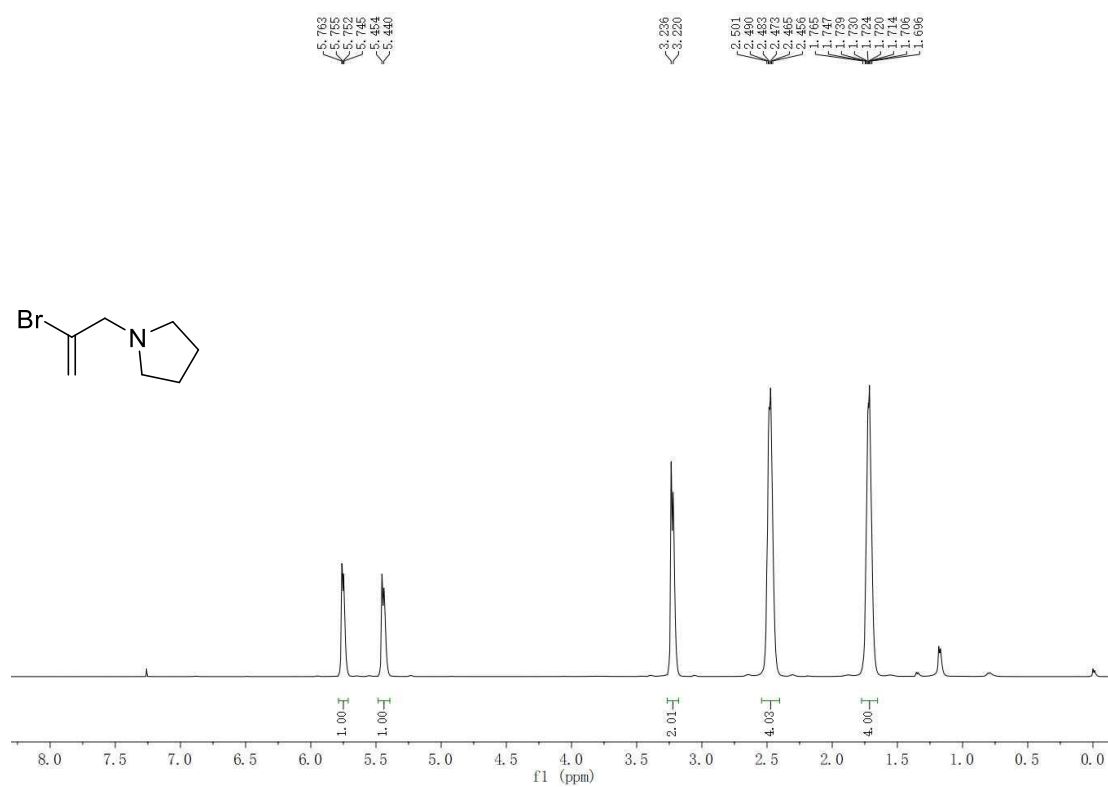

Figure S22.  $^{13}\text{C}\{^1\text{H}\}$  NMR spectra (100 MHz, Chloroform-*d*) of 1-(2-Bromoallyl)pyrrolidine (2g).

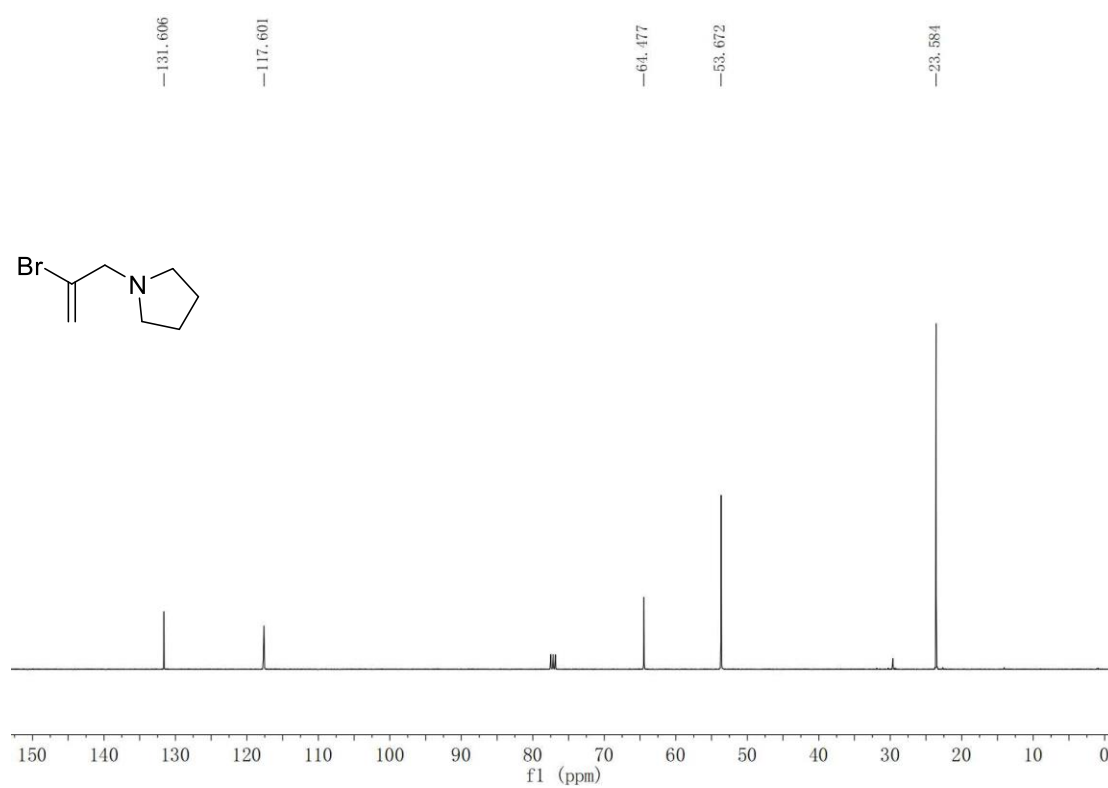



Figure S23.  $^1\text{H}$  NMR spectra (400 MHz, Chloroform-*d*) of 1-(2-Bromoallyl)piperidine (2h).

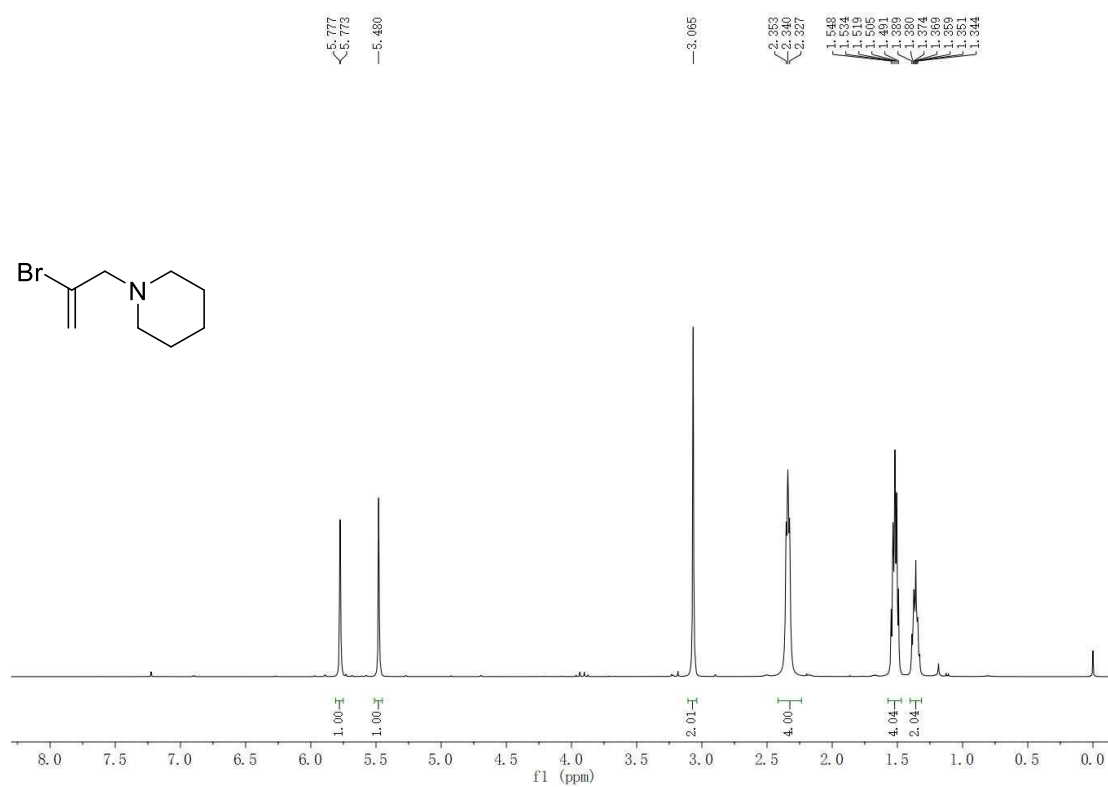

Figure S24.  $^{13}\text{C}\{^1\text{H}\}$  NMR spectra (100 MHz, Chloroform-*d*) of 1-(2-Bromoallyl)piperidine (2h).

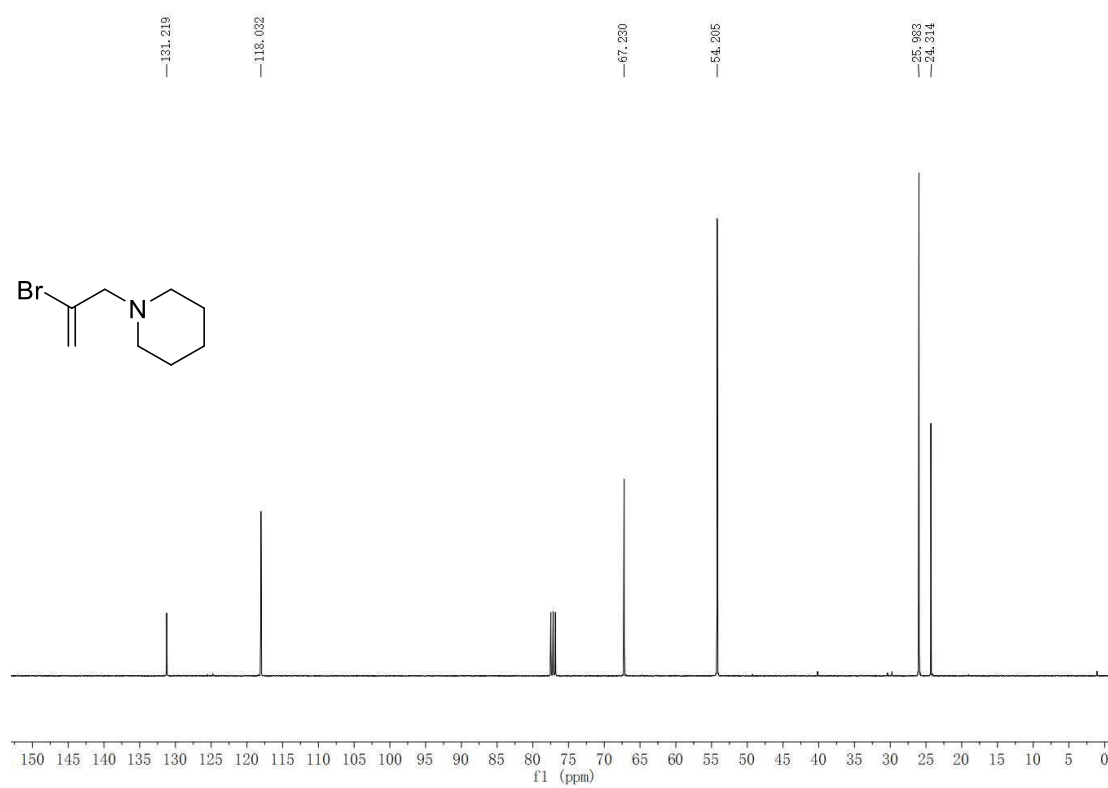

**Figure S25.**  $^1\text{H}$  NMR spectra (400 MHz, Chloroform-*d*) of 2-(2-Bromoallyl)-1,2,3,4-tetrahydroisoquinoline (**2i**).

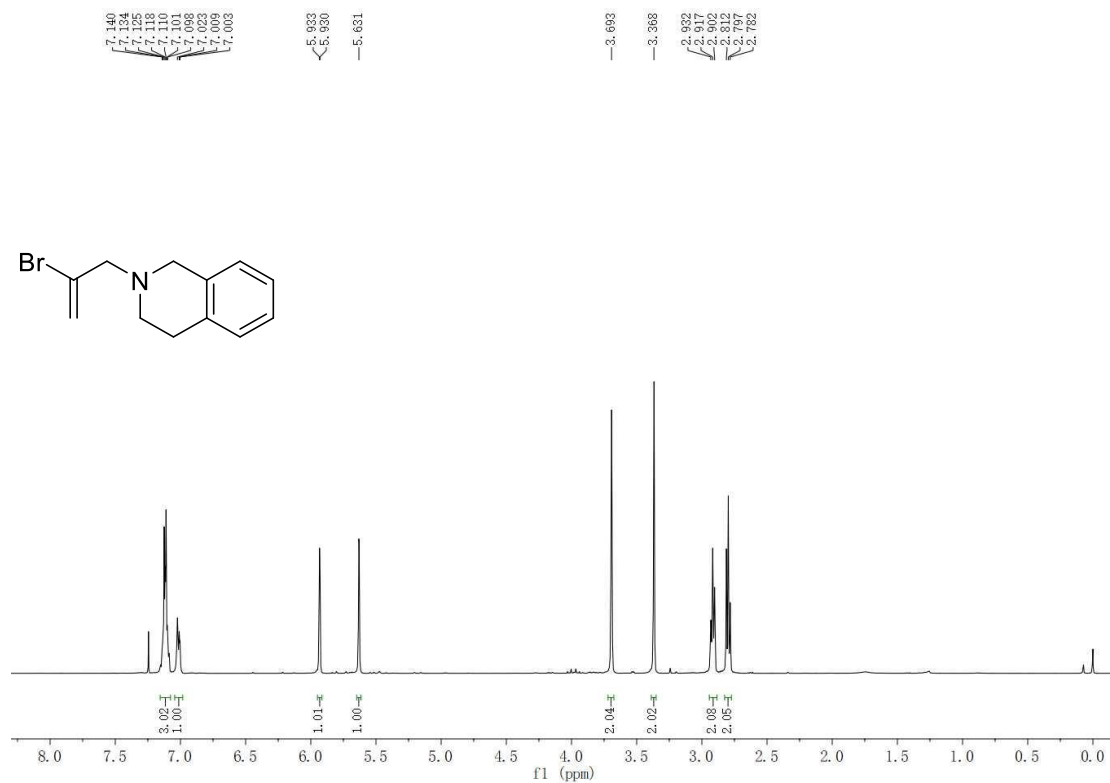

**Figure S26.**  $^{13}\text{C}\{^1\text{H}\}$  NMR spectra (100 MHz, Chloroform-*d*) of 2-(2-Bromoallyl)-1,2,3,4-tetrahydroisoquinoline (**2i**).

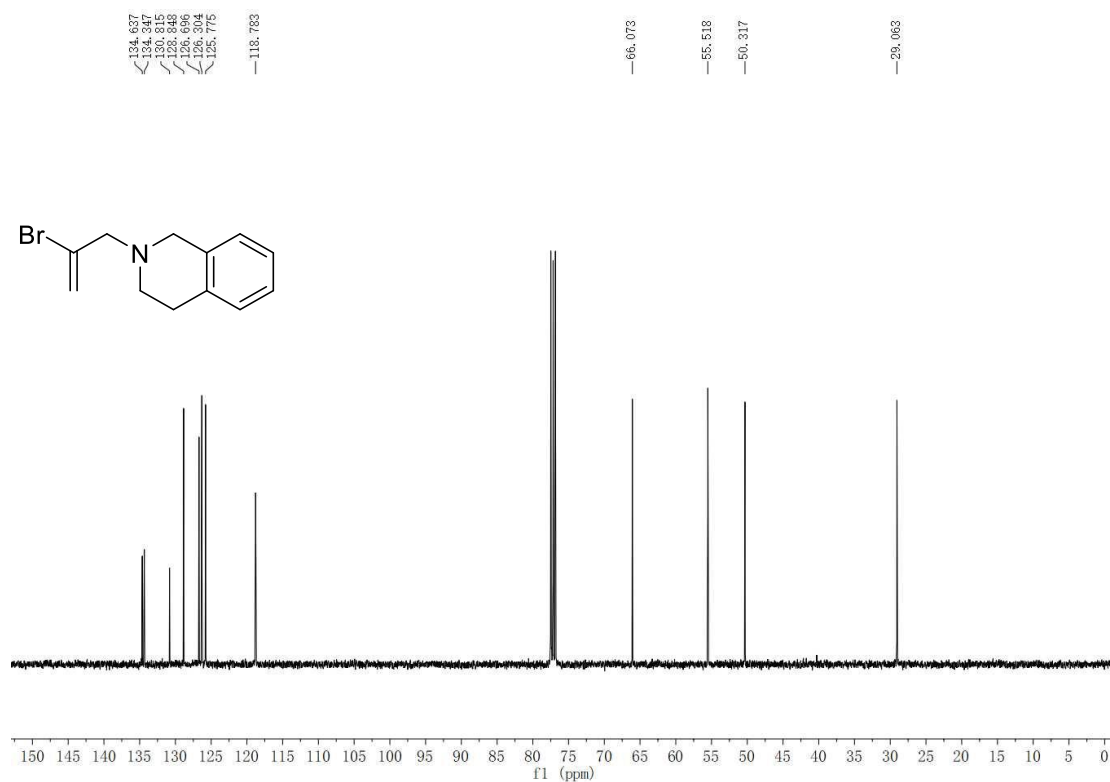

**Figure S27.  $^1\text{H}$  NMR spectra (400 MHz, Chloroform- $d$ ) of (*R*)-*N*-(2-Methyl-1-phenylallyl)-9*H*-fluoren-9-imine (3aa).**

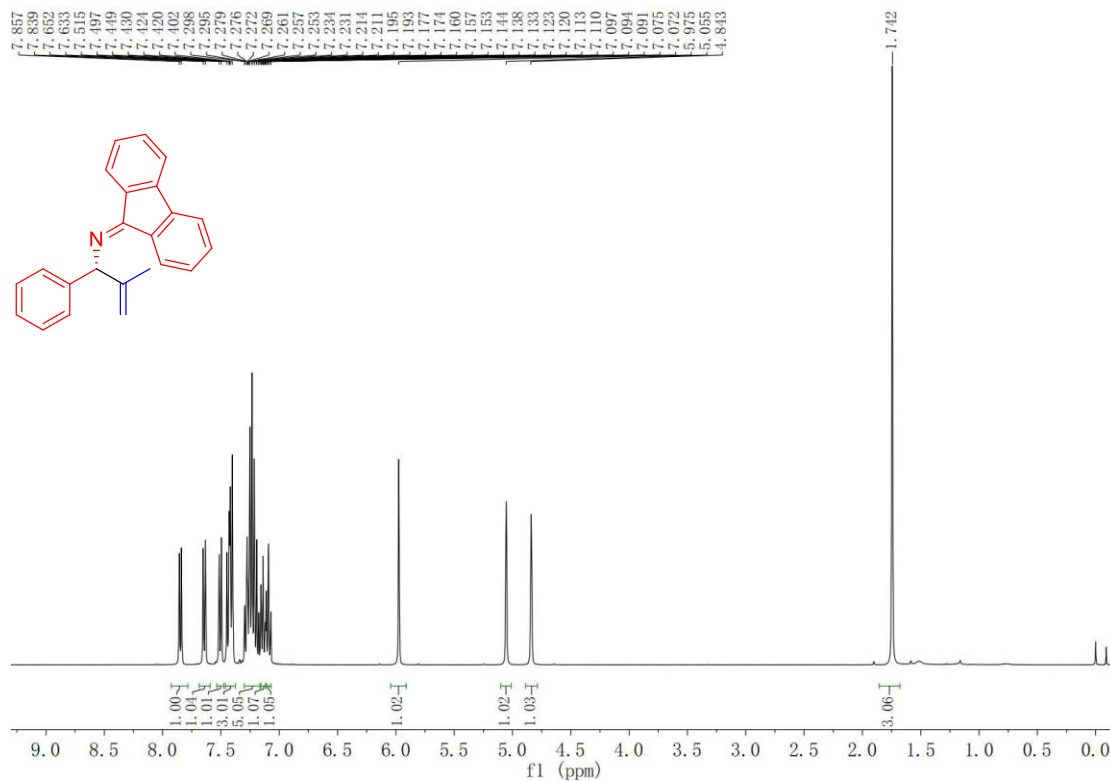

**Figure S28.  $^{13}\text{C}\{^1\text{H}\}$  NMR spectra (100 MHz, Chloroform- $d$ ) of (*R*)-*N*-(2-Methyl-1-phenylallyl)-9*H*-fluoren-9-imine (3aa).**

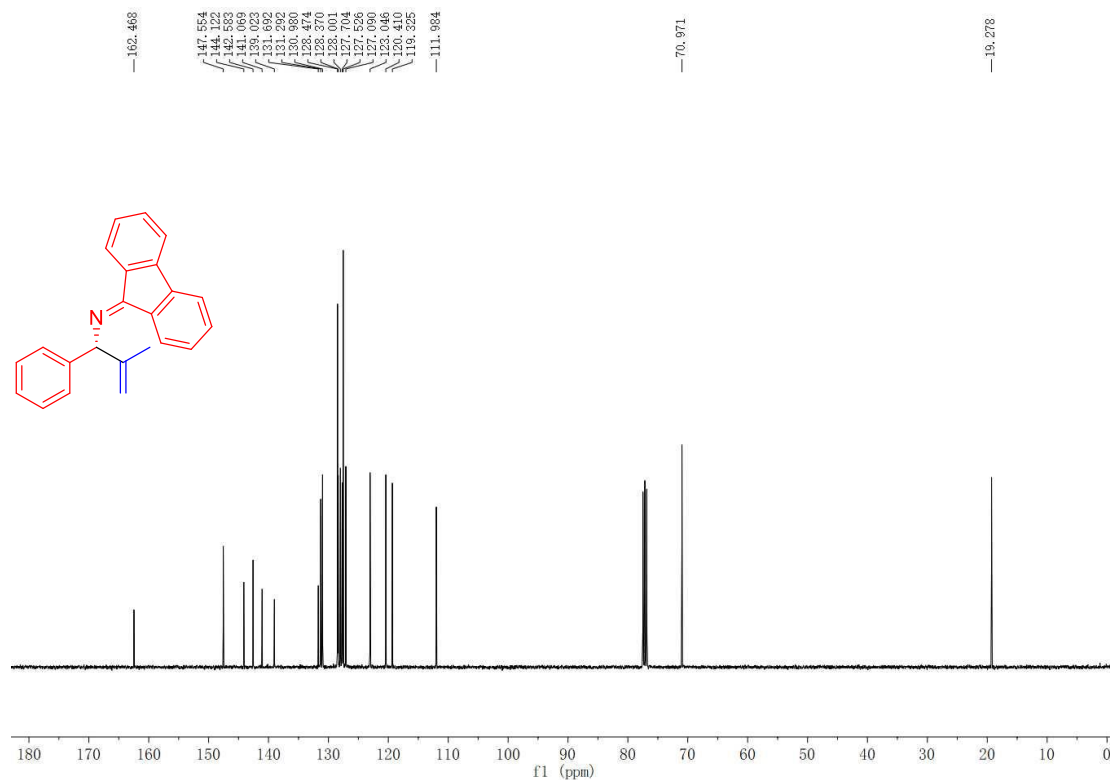

**Figure S29. HPLC Chromatography of the Racemic *N*-(2-Methyl-1-phenylallyl)-9*H*-fluoren-9-imine (3aa).**

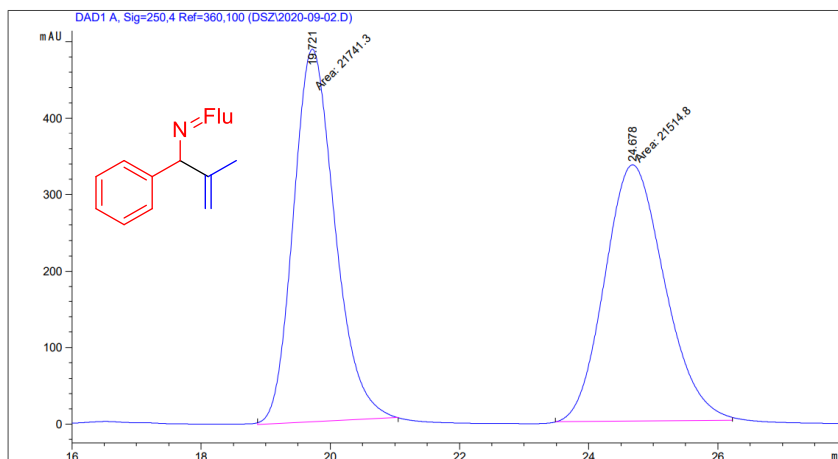

Signal 1: DAD1 A, Sig=250,4 Ref=360,100

| Peak # | RetTime [min] | Type | Width [min] | Area [mAU*s] | Height [mAU] | Area %  |
|--------|---------------|------|-------------|--------------|--------------|---------|
| 1      | 19.721        | MM   | 0.7448      | 2.17413e4    | 486.49799    | 50.2618 |
| 2      | 24.678        | MM   | 1.0724      | 2.15148e4    | 334.36270    | 49.7382 |

Totals : 4.32562e4 820.86069

**Figure S30. HPLC Chromatography of (*R*)-*N*-(2-Methyl-1-phenylallyl)-9*H*-fluoren-9-imine (3aa).**

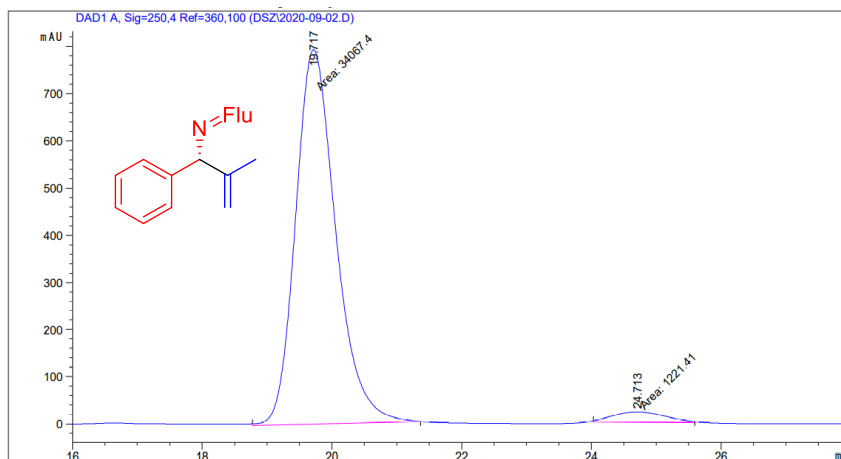

Signal 1: DAD1 A, Sig=250,4 Ref=360,100

| Peak # | RetTime [min] | Type | Width [min] | Area [mAU*s] | Height [mAU] | Area %  |
|--------|---------------|------|-------------|--------------|--------------|---------|
| 1      | 19.717        | MM   | 0.7166      | 3.40674e4    | 792.30365    | 96.5388 |
| 2      | 24.713        | MM   | 0.9218      | 1221.40576   | 22.08405     | 3.4612  |

Totals : 3.52888e4 814.38770

**Figure S31.**  $^1\text{H}$  NMR spectra (400 MHz, Chloroform-*d*) of (*R*)-4-(1-((9*H*-Fluoren-9-ylidene)amino)-2-methylallyl)-*N,N*-dimethylaniline (3ba).

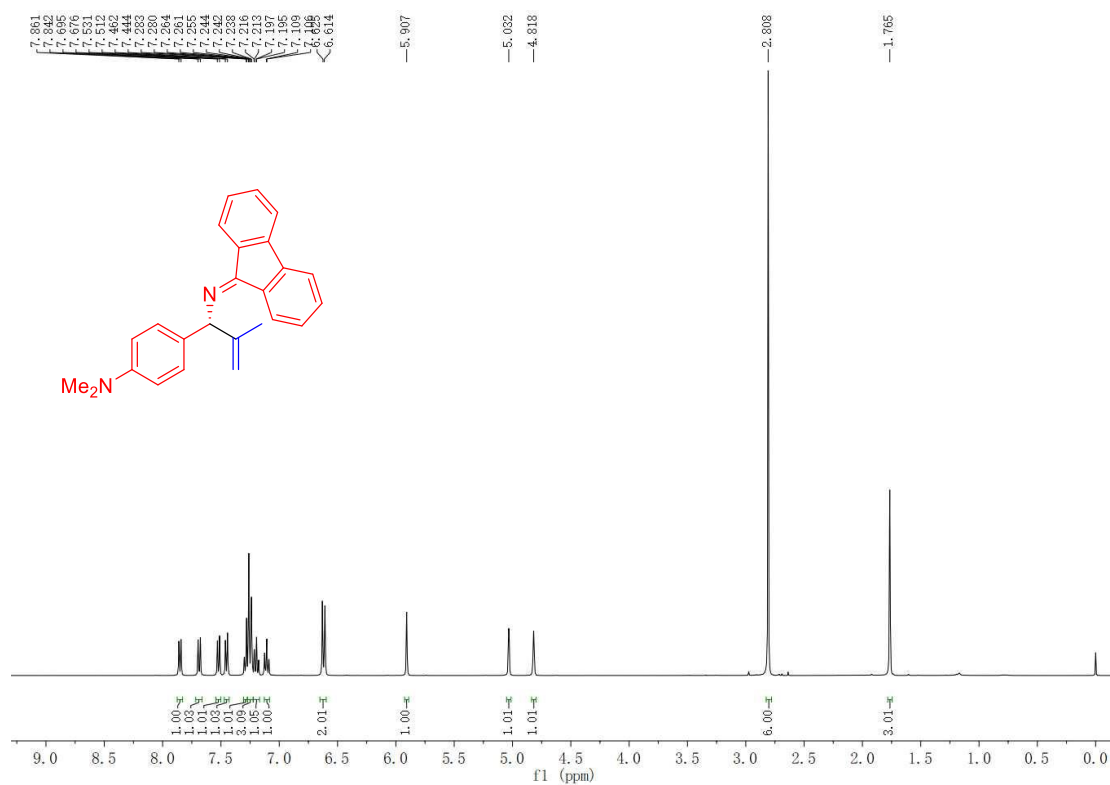

**Figure S32.**  $^{13}\text{C}\{^1\text{H}\}$  NMR spectra (100 MHz, Chloroform-*d*) of (*R*)-4-(1-((9*H*-Fluoren-9-ylidene)amino)-2-methylallyl)-*N,N*-dimethylaniline (3ba).

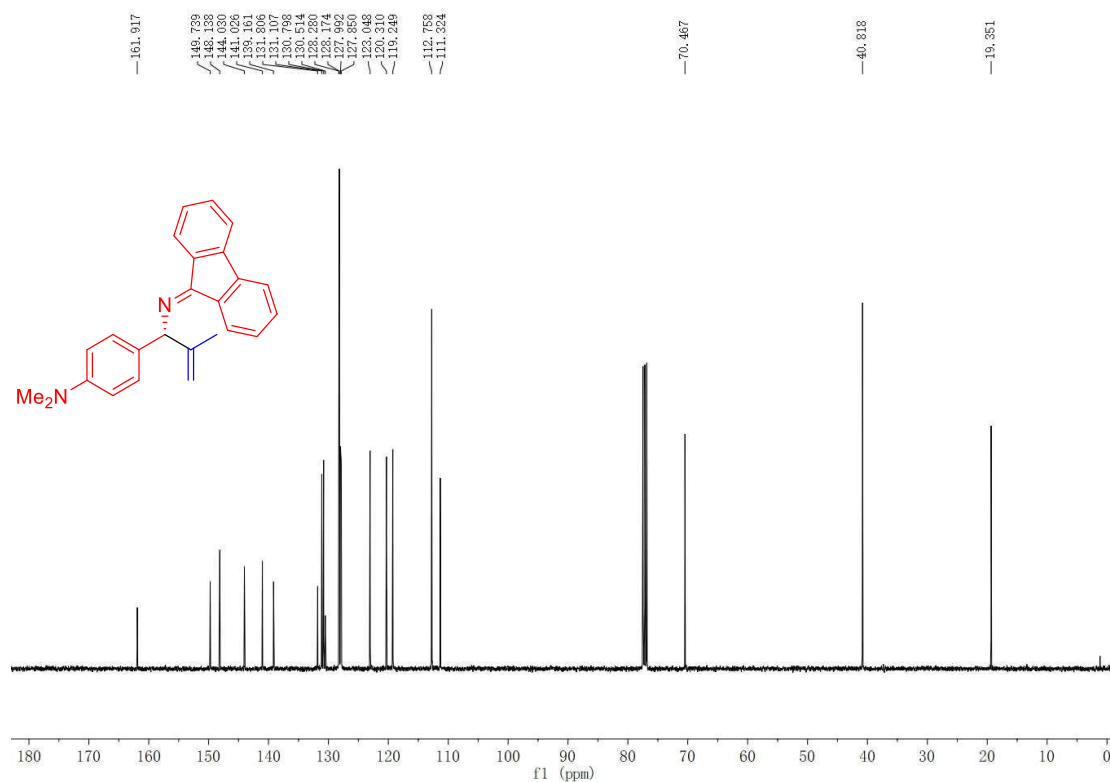

**Figure S33. HPLC Chromatography of the Racemic 4-(1-((9*H*-Fluoren-9-ylidene)amino)-2-methylallyl)-*N,N*-dimethylaniline (3ba).**

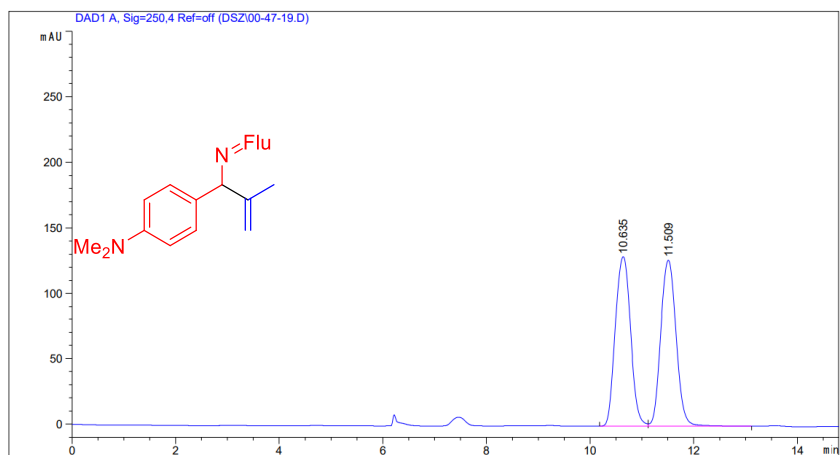

Signal 1: DAD1 A, Sig=250,4 Ref=off

| Peak # | RetTime [min] | Type | Width [min] | Area [mAU*s] | Height [mAU] | Area %  |
|--------|---------------|------|-------------|--------------|--------------|---------|
| 1      | 10.635        | BV   | 0.3294      | 2640.80225   | 129.80450    | 50.2210 |
| 2      | 11.509        | VB   | 0.3284      | 2617.56006   | 127.04807    | 49.7790 |

Totals : 5258.36230 256.85258

**Figure S34. HPLC Chromatography of (*R*)-4-(1-((9*H*-Fluoren-9-ylidene)amino)-2-methylallyl)-*N,N*-dimethylaniline (3ba).**

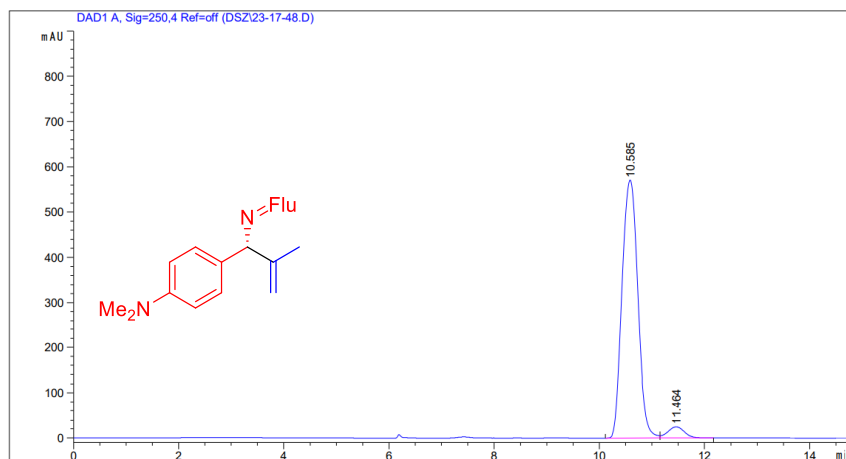

Signal 1: DAD1 A, Sig=250,4 Ref=off

| Peak # | RetTime [min] | Type | Width [min] | Area [mAU*s] | Height [mAU] | Area %  |
|--------|---------------|------|-------------|--------------|--------------|---------|
| 1      | 10.585        | BF   | 0.3298      | 1.18321e4    | 570.89478    | 95.5828 |
| 2      | 11.464        | VBA  | 0.3480      | 546.79565    | 24.53609     | 4.4172  |

Totals : 1.23789e4 595.43086

**Figure S35.**  $^1\text{H}$  NMR spectra (400 MHz, Chloroform-*d*) of (*R*)-*N*-(1-(4-Fluorophenyl)-2-methylallyl)-9*H*-fluoren-9-imine (**3ca**).

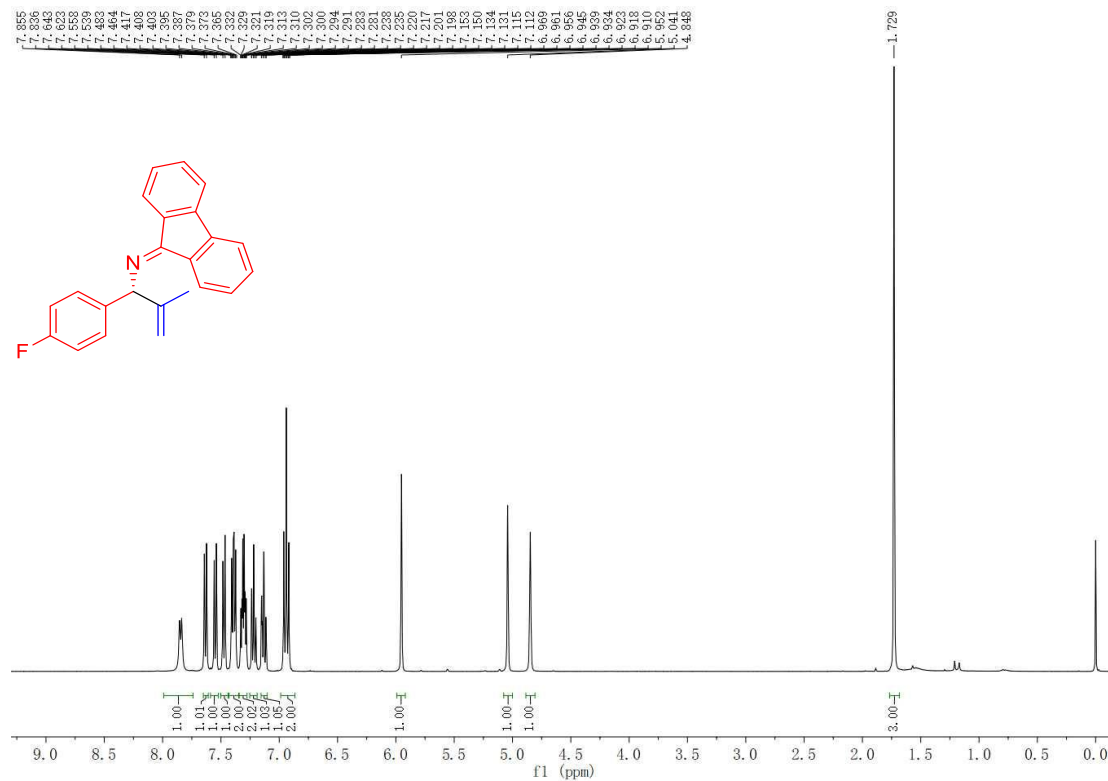

**Figure S36.**  $^{13}\text{C}\{^1\text{H}\}$  NMR spectra (100 MHz, Chloroform-*d*) of (*R*)-*N*-(1-(4-Fluorophenyl)-2-methylallyl)-9*H*-fluoren-9-imine (**3ca**).

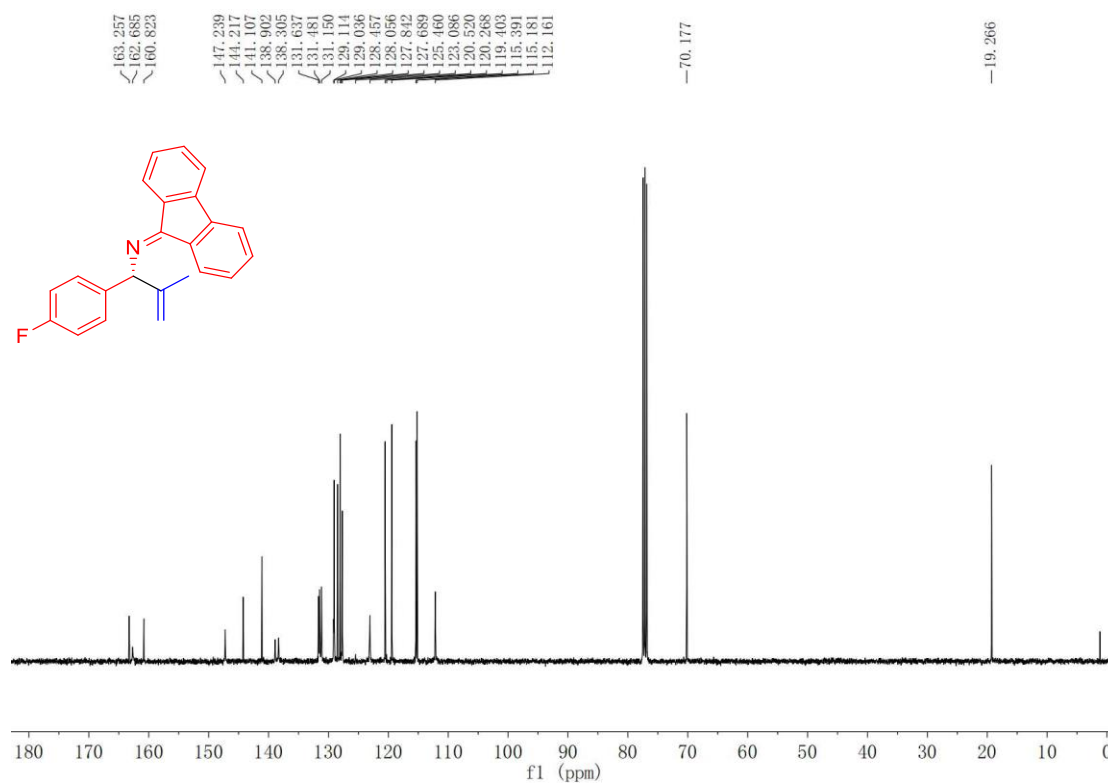

**Figure S37.**  $^{19}\text{F}$  NMR spectra (376 MHz, Chloroform-*d*) of (*R*)-*N*-(1-(4-Fluorophenyl)-2-methylallyl)-9*H*-fluoren-9-imine (**3ca**).

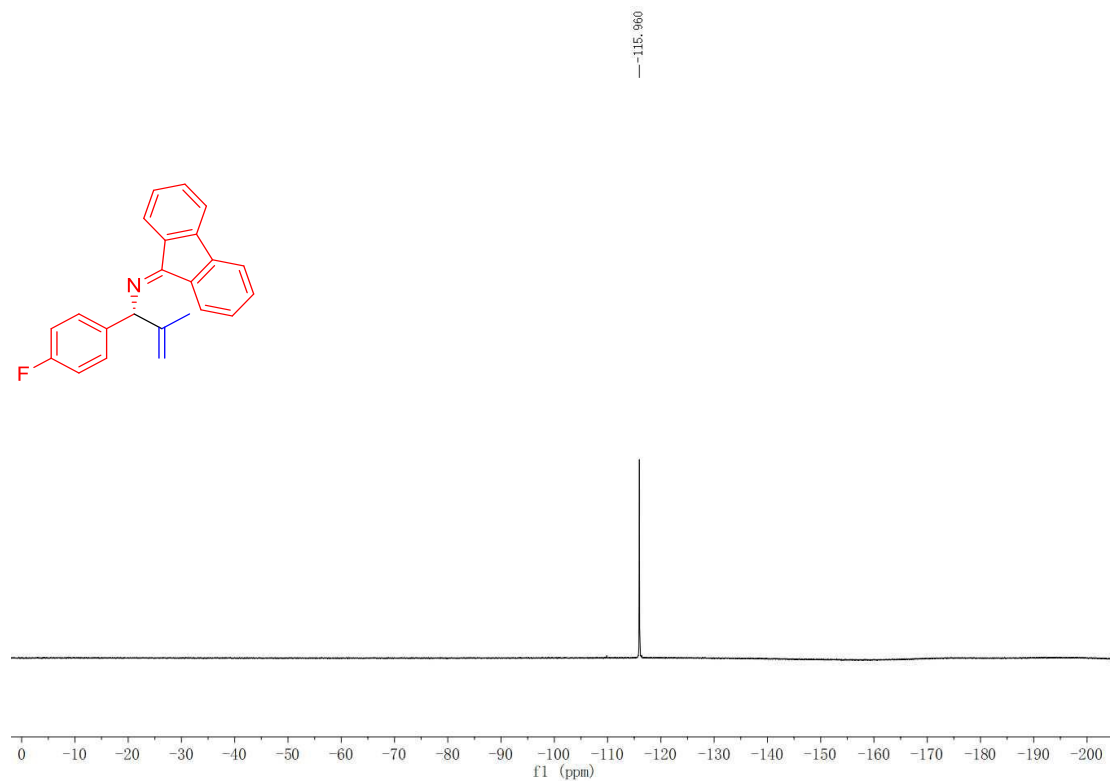



**Figure S38. HPLC Chromatography of the Racemic *N*-(1-(4-Fluorophenyl)-2-methylallyl)-9*H*-fluoren-9-imine (3ca).**

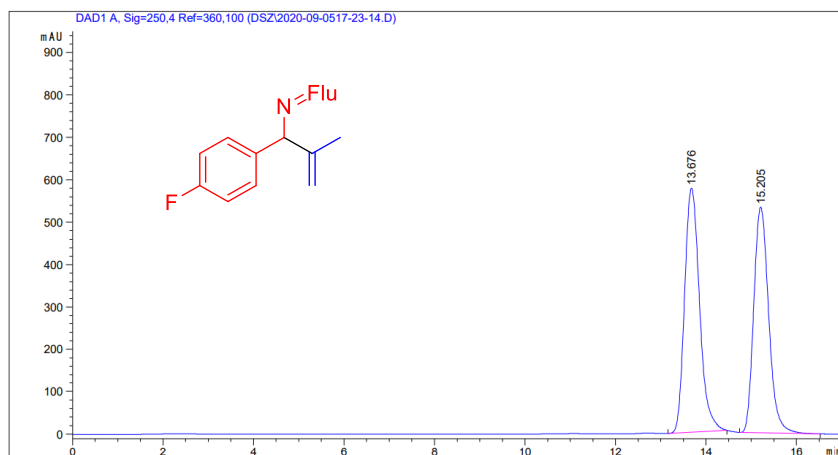

Signal 1: DAD1 A, Sig=250,4 Ref=360,100

| Peak # | RetTime [min] | Type | Width [min] | Area [mAU*s] | Height [mAU] | Area %  |
|--------|---------------|------|-------------|--------------|--------------|---------|
| 1      | 13.676        | BBA  | 0.3597      | 1.31941e4    | 575.11237    | 52.0442 |
| 2      | 15.205        | BB   | 0.3605      | 1.21576e4    | 532.24512    | 47.9558 |

Totals : 2.53517e4 1107.35748

**Figure S39. HPLC Chromatography of (*R*)-*N*-(1-(4-Fluorophenyl)-2-methylallyl)-9*H*-fluoren-9-imine (3ca).**

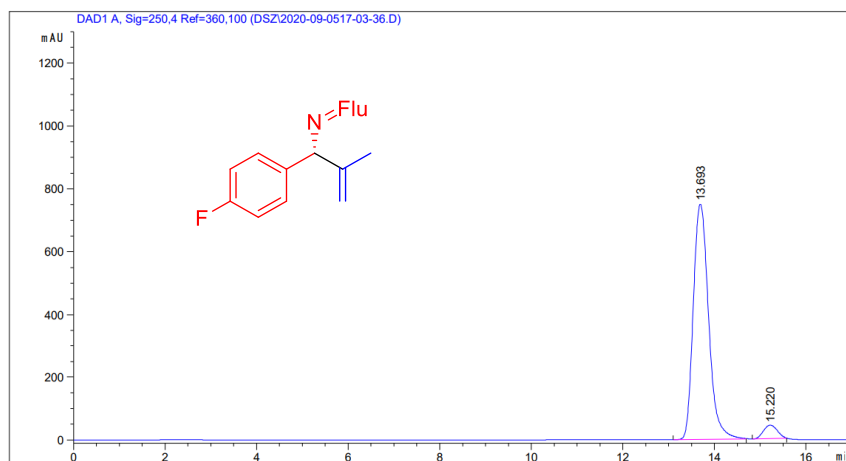

Signal 1: DAD1 A, Sig=250,4 Ref=360,100

| Peak # | RetTime [min] | Type | Width [min] | Area [mAU*s] | Height [mAU] | Area %  |
|--------|---------------|------|-------------|--------------|--------------|---------|
| 1      | 13.693        | BF   | 0.3670      | 1.74356e4    | 750.59973    | 95.1623 |
| 2      | 15.220        | BBAS | 0.3354      | 886.35358    | 42.48063     | 4.8377  |

Totals : 1.83219e4 793.08036

**Figure S40.**  $^1\text{H}$  NMR spectra (400 MHz, Chloroform- $d$ ) of (*R*)-*N*-(1-(4-Chlorophenyl)-2-methylallyl)-9*H*-fluoren-9-imine (**3da**).

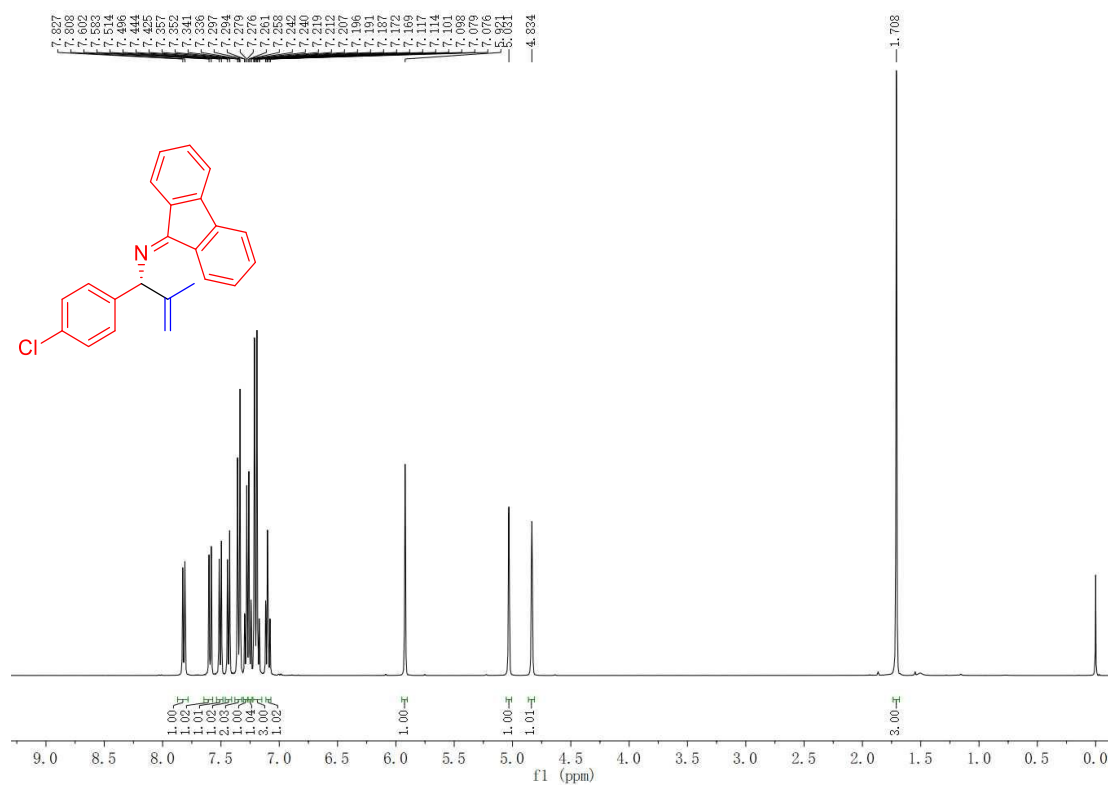

**Figure S41.**  $^{13}\text{C}\{^1\text{H}\}$  NMR spectra (100 MHz, Chloroform- $d$ ) of (*R*)-*N*-(1-(4-Chlorophenyl)-2-methylallyl)-9*H*-fluoren-9-imine (**3da**).

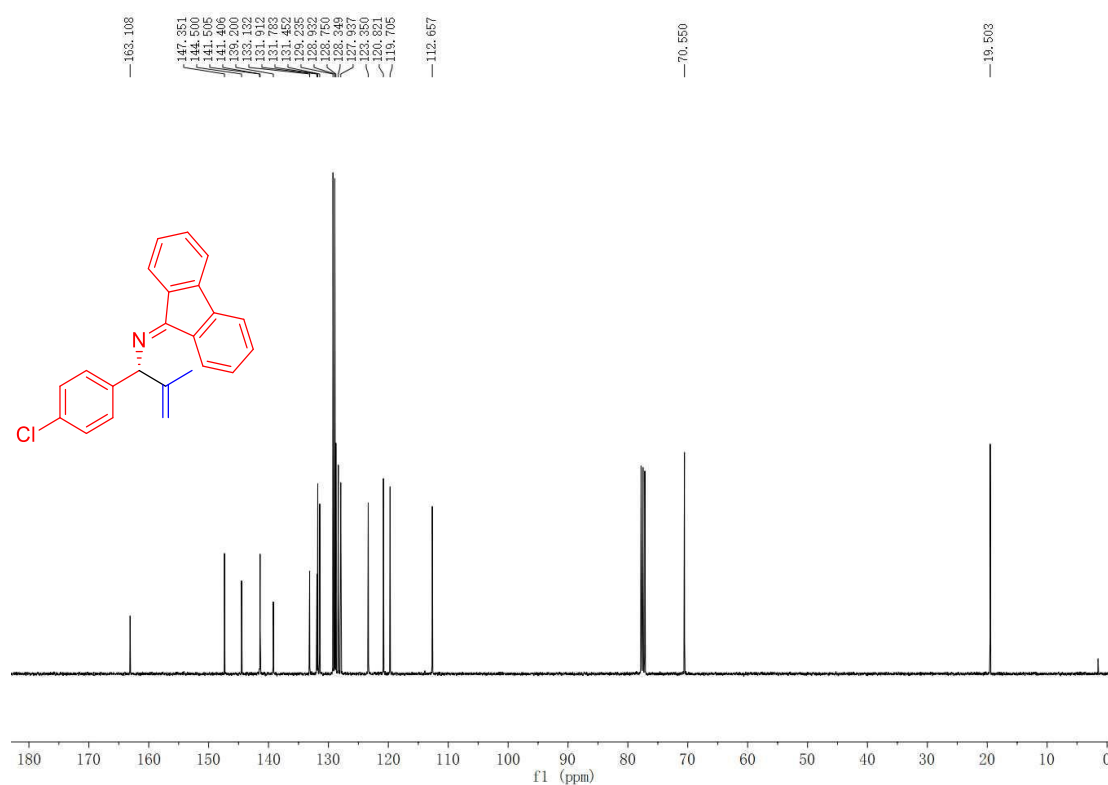

**Figure S42.** HPLC Chromatography of the Racemic *N*-(1-(4-Chlorophenyl)-2-methylallyl)-

**9H-fluoren-9-imine (3da).**

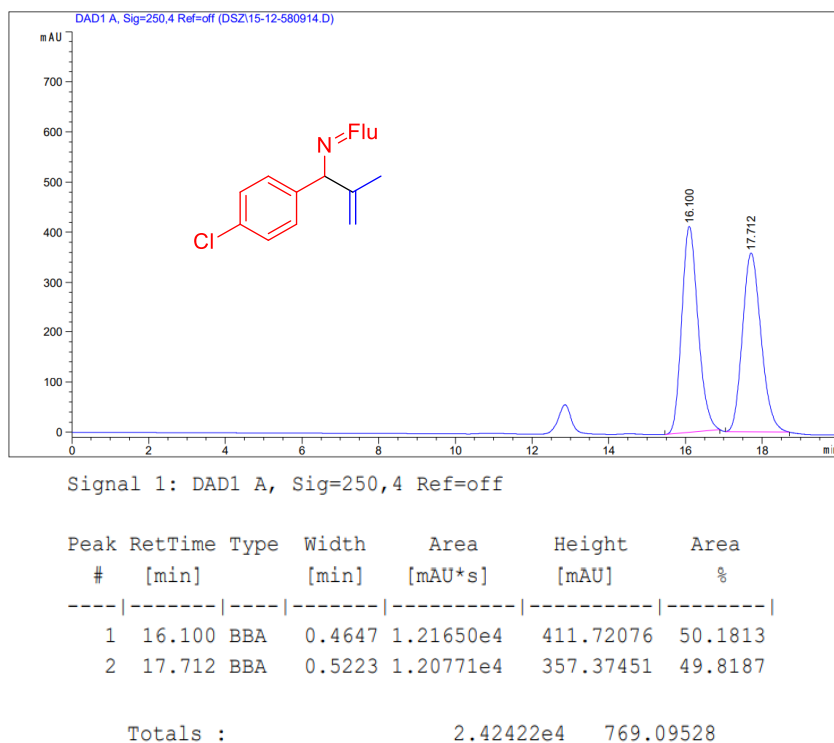

**Figure S43. HPLC Chromatography of (R)-N-(1-(4-Chlorophenyl)-2-methylallyl)-9H-fluoren-9-imine (3da).**

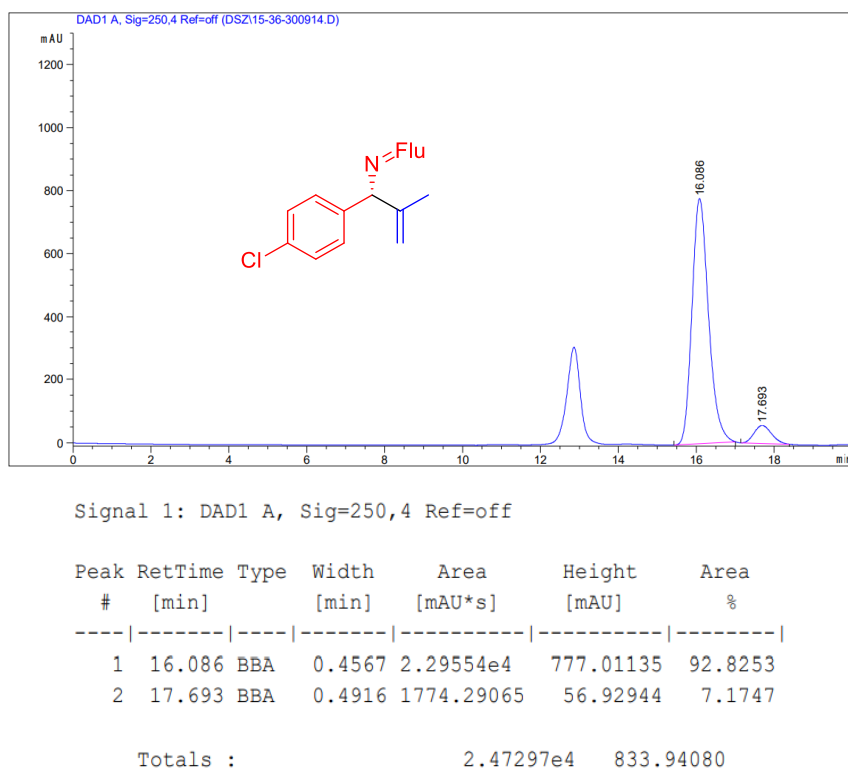

Figure S44.  $^1\text{H}$  NMR spectra (400 MHz, Chloroform-*d*) of (*R*)-*N*-(1-(4-Bromophenyl)-2-methylallyl)-9*H*-fluoren-9-imine (**3ea**).

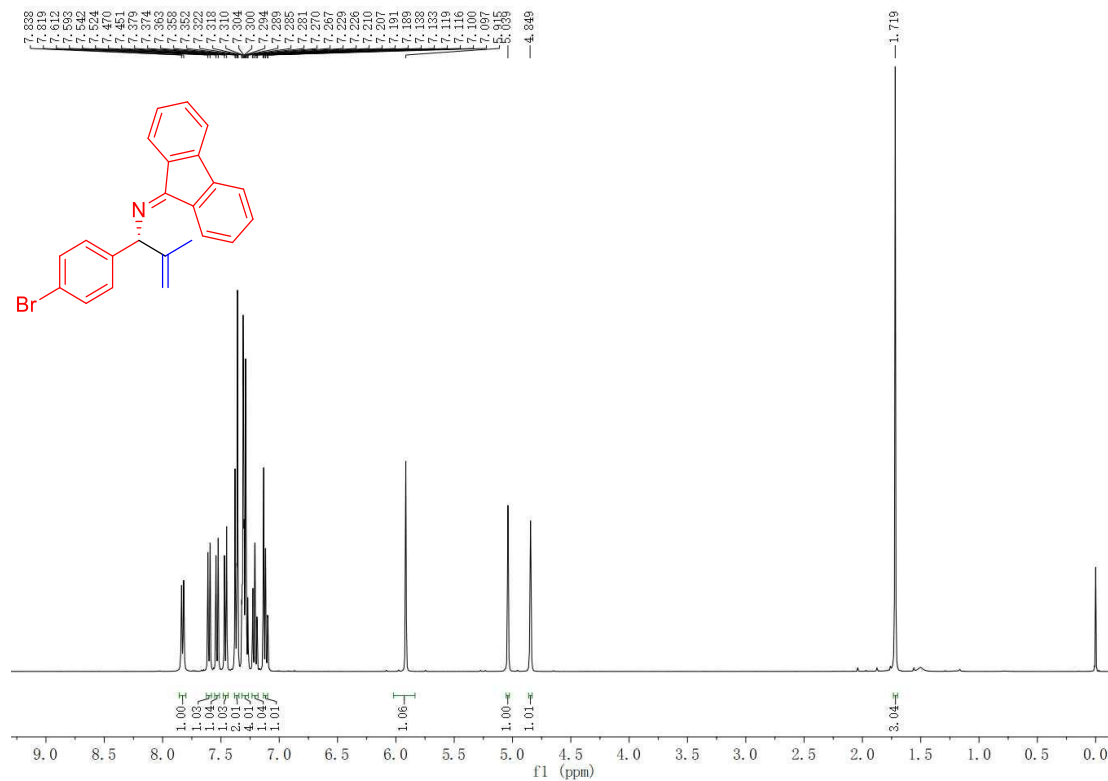

Figure S45.  $^{13}\text{C}\{^1\text{H}\}$  NMR spectra (100 MHz, Chloroform-*d*) of (*R*)-*N*-(1-(4-Bromophenyl)-2-methylallyl)-9*H*-fluoren-9-imine (**3ea**).

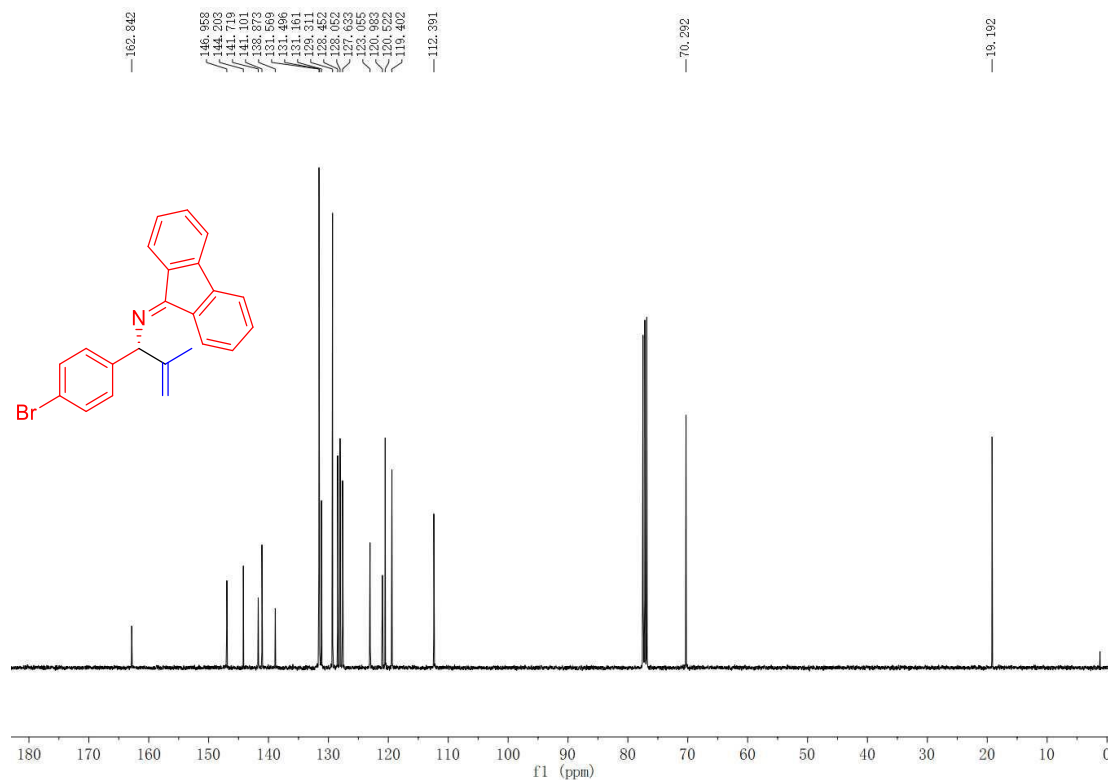

**Figure S46. HPLC Chromatography of the Racemic *N*-(1-(4-Bromophenyl)-2-methylallyl)-9*H*-fluoren-9-imine (3ea).**

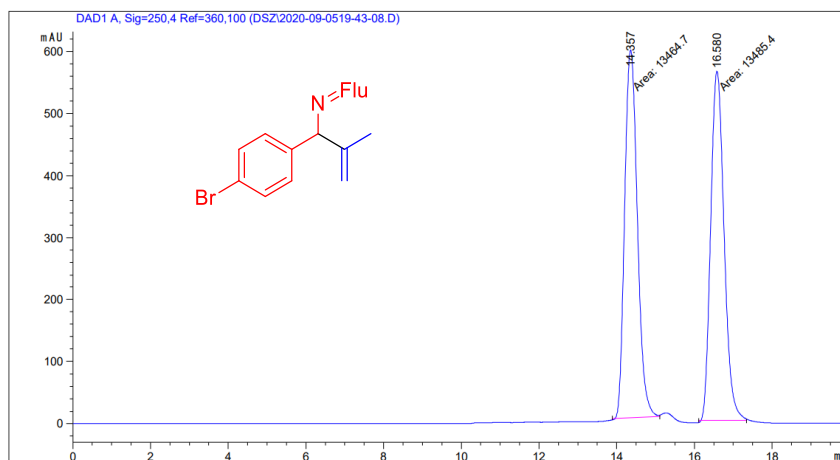

Signal 1: DAD1 A, Sig=250,4 Ref=360,100

| Peak # | RetTime [min] | Type | Width [min] | Area [mAU*s] | Height [mAU] | Area %  |
|--------|---------------|------|-------------|--------------|--------------|---------|
| 1      | 14.357        | MM   | 0.3784      | 1.34647e4    | 593.06653    | 49.9617 |
| 2      | 16.580        | MM   | 0.3990      | 1.34854e4    | 563.26624    | 50.0383 |

Totals : 2.69501e4 1156.33276

**Figure S47. HPLC Chromatography of (*R*)-*N*-(1-(4-Bromophenyl)-2-methylallyl)-9*H*-fluoren-9-imine (3ea).**

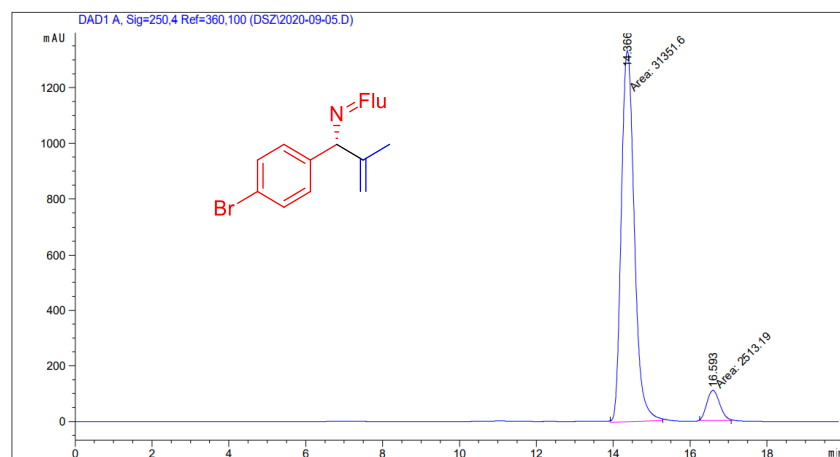

Signal 1: DAD1 A, Sig=250,4 Ref=360,100

| Peak # | RetTime [min] | Type | Width [min] | Area [mAU*s] | Height [mAU] | Area %  |
|--------|---------------|------|-------------|--------------|--------------|---------|
| 1      | 14.366        | MM   | 0.3918      | 3.13516e4    | 1333.76245   | 92.5788 |
| 2      | 16.593        | MM   | 0.3882      | 2513.19092   | 107.89948    | 7.4212  |

Totals : 3.38648e4 1441.66193

**Figure S48.**  $^1\text{H}$  NMR spectra (400 MHz, Chloroform-*d*) of (*R*)-*N*-(1-(4-(*tert*-Butyl)phenyl)-2-methylallyl)-9*H*-fluoren-9-imine (**3fa**).

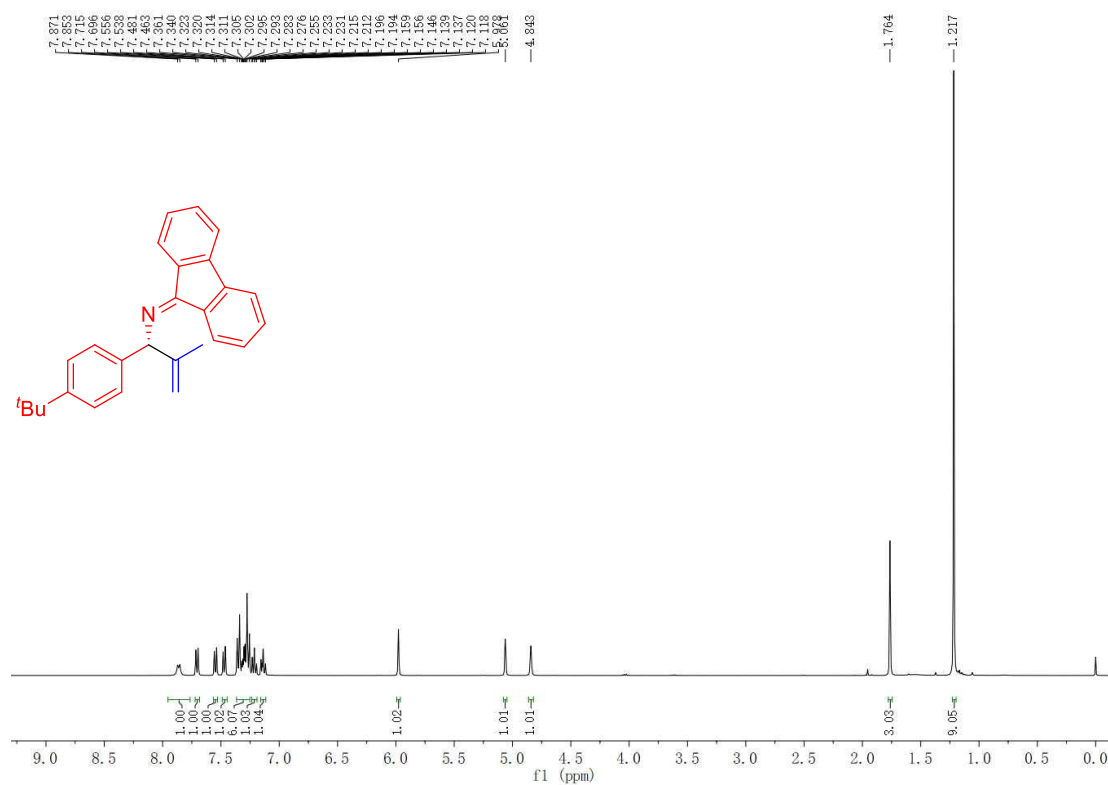

**Figure S49.**  $^{13}\text{C}\{^1\text{H}\}$  NMR spectra (100 MHz, Chloroform-*d*) of (*R*)-*N*-(1-(4-(*tert*-Butyl)phenyl)-2-methylallyl)-9*H*-fluoren-9-imine (**3fa**).

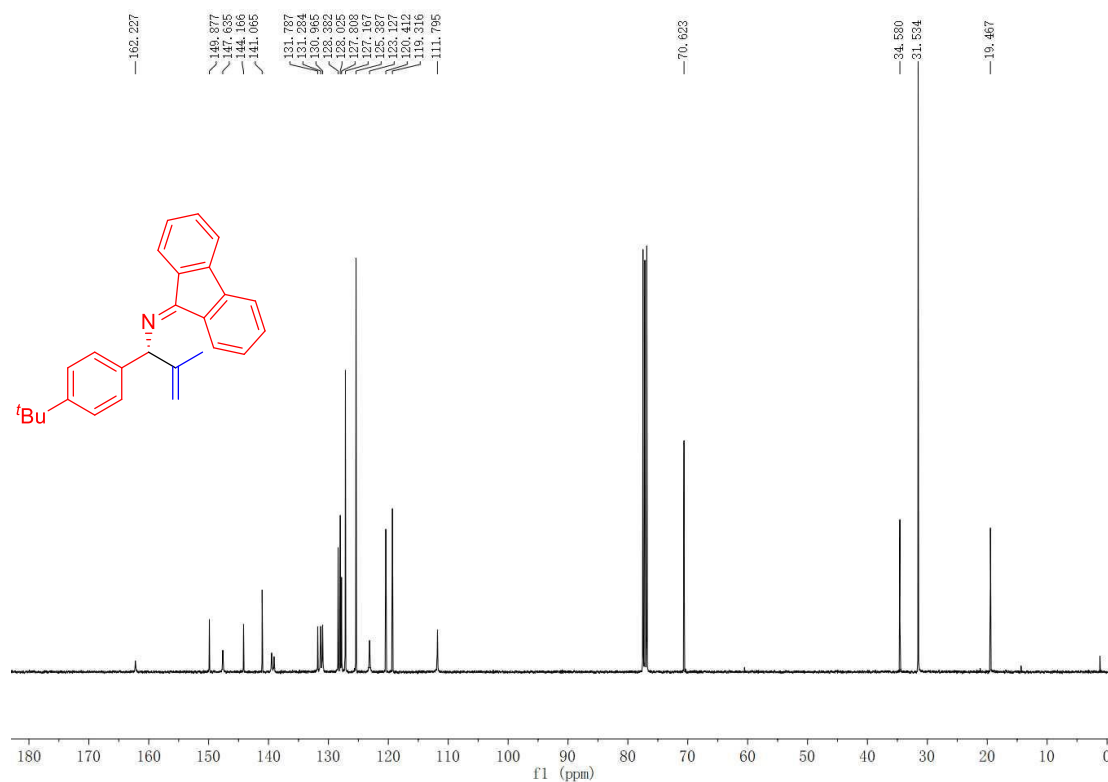

**Figure S50. HPLC Chromatography of the Racemic *N*-(1-(4-(*tert*-Butyl)phenyl)-2-methylallyl)-9*H*-fluoren-9-imine (3fa).**

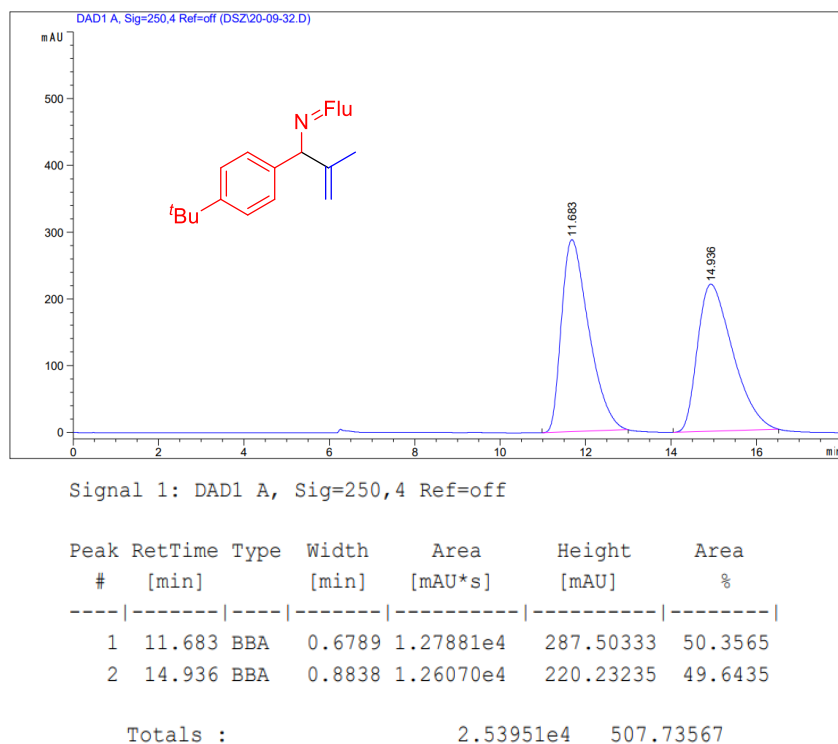

**Figure S51. HPLC Chromatography of (*R*)-*N*-(1-(4-(*tert*-Butyl)phenyl)-2-methylallyl)-9*H*-fluoren-9-imine (3fa).**

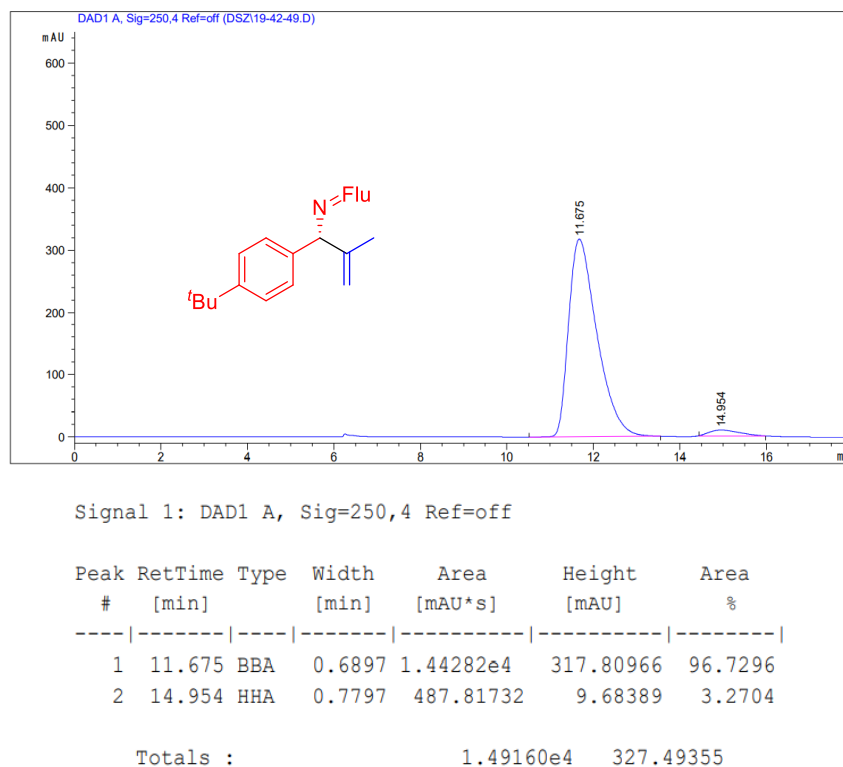

**Figure S52.**  $^1\text{H}$  NMR spectra (400 MHz, Chloroform-*d*) of (*R*)-*N*-(1-([1,1'-Biphenyl]-4-yl)-2-methylallyl)-9*H*-fluoren-9-imine (**3ga**).

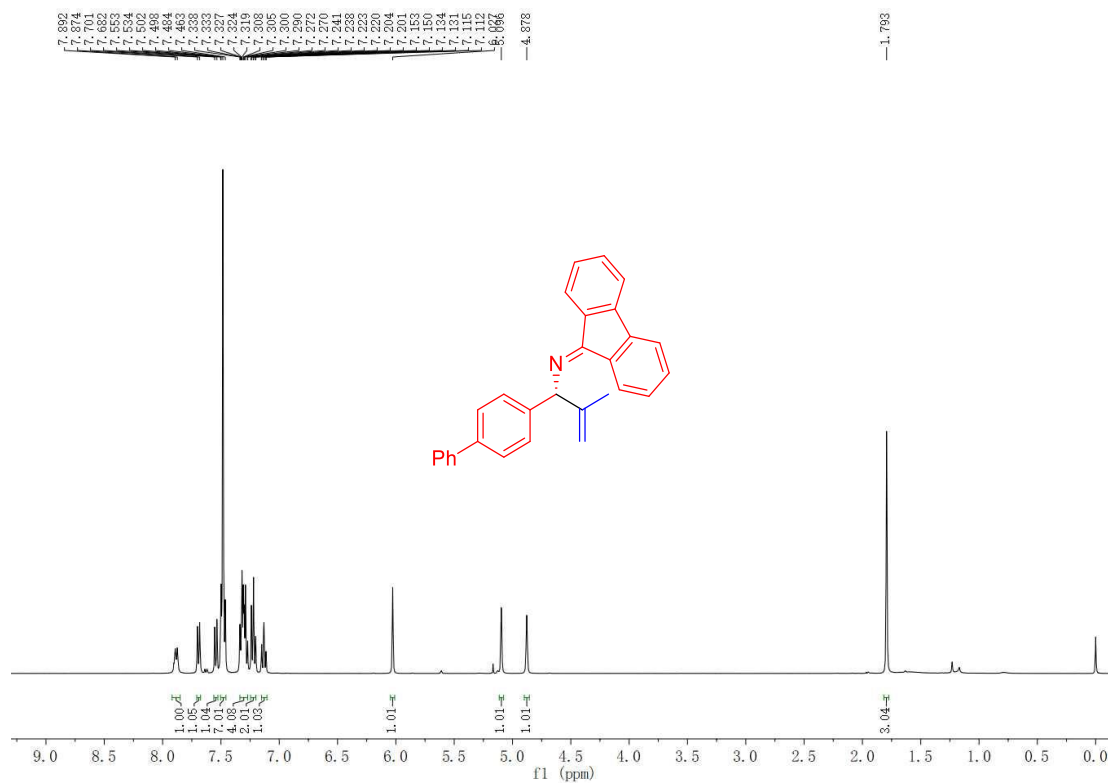

**Figure S53.**  $^{13}\text{C}\{^1\text{H}\}$  NMR spectra (100 MHz, Chloroform-*d*) of (*R*)-*N*-(1-([1,1'-Biphenyl]-4-yl)-2-methylallyl)-9*H*-fluoren-9-imine (**3ga**).

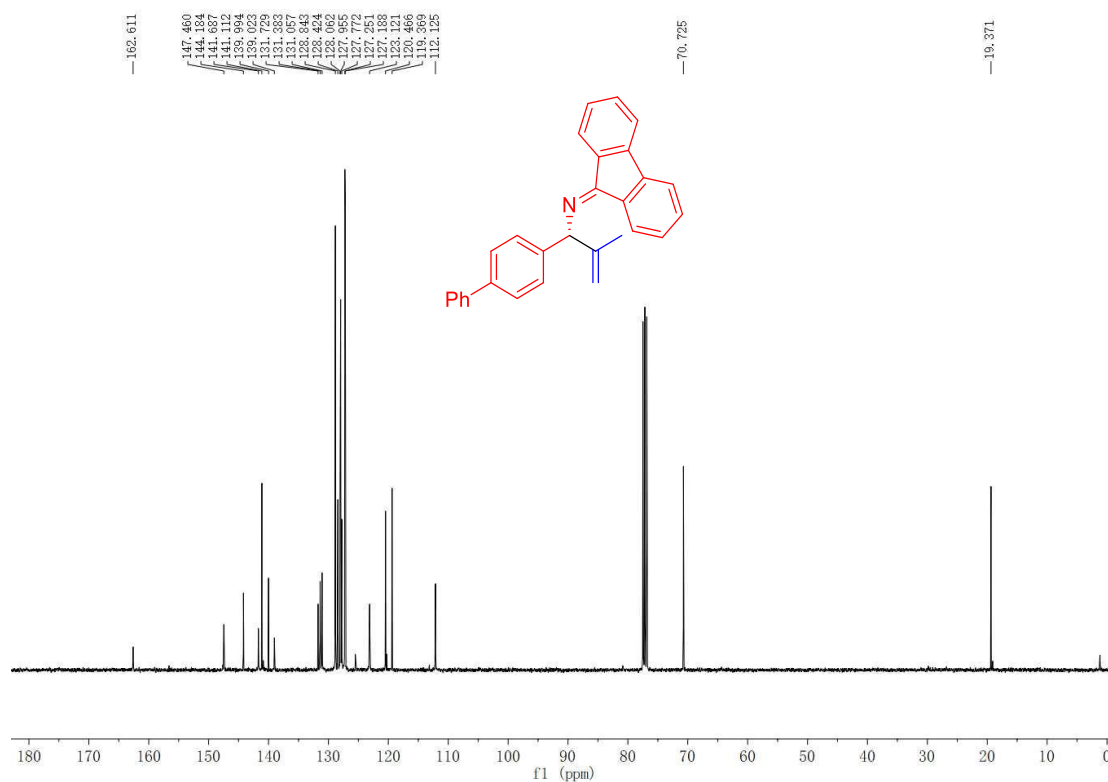



**Figure S54. HPLC Chromatography of the Racemic (*N*-(1-([1,1'-Biphenyl]-4-yl)-2-methylallyl)-9*H*-fluoren-9-imine (3ga).**

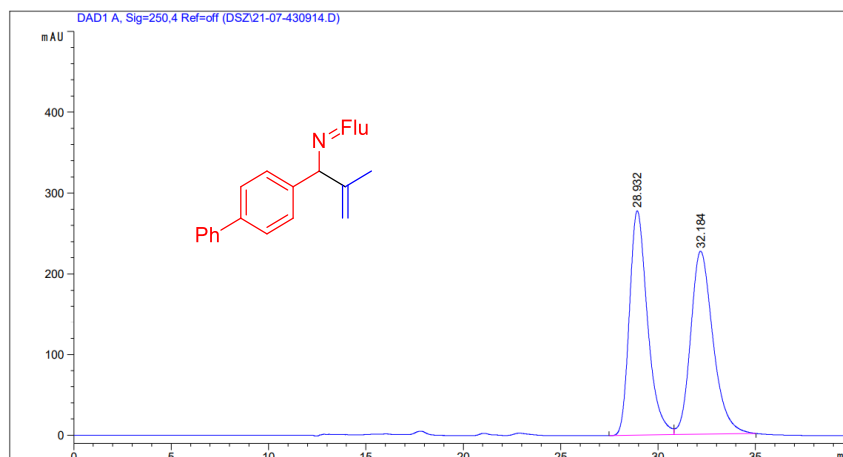

Signal 1: DAD1 A, Sig=250,4 Ref=off

| Peak # | RetTime [min] | Type | Width [min] | Area [mAU*s] | Height [mAU] | Area %  |
|--------|---------------|------|-------------|--------------|--------------|---------|
| 1      | 28.932        | BV   | 0.9883      | 1.80421e4    | 278.30872    | 49.8288 |
| 2      | 32.184        | VBA  | 1.2206      | 1.81660e4    | 227.25209    | 50.1712 |

Totals : 3.62081e4 505.56081

**Figure S55. HPLC Chromatography of (*R*)-*N*-(1-([1,1'-Biphenyl]-4-yl)-2-methylallyl)-9*H*-fluoren-9-imine (3ga).**

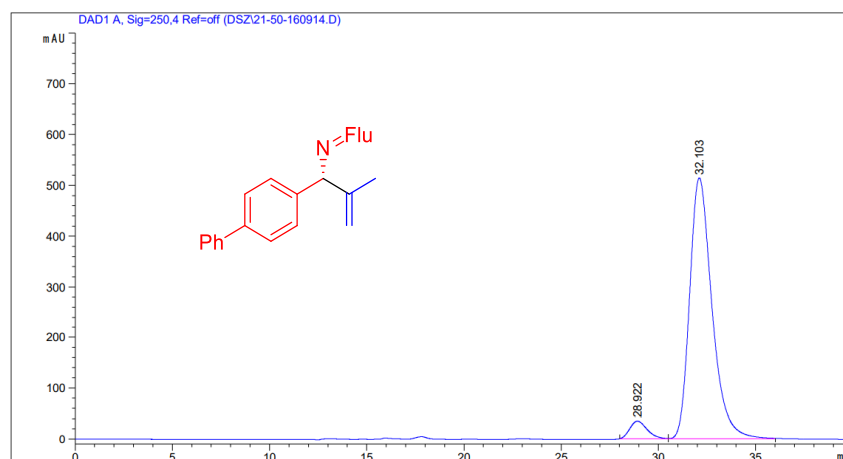

Signal 1: DAD1 A, Sig=250,4 Ref=off

| Peak # | RetTime [min] | Type | Width [min] | Area [mAU*s] | Height [mAU] | Area %  |
|--------|---------------|------|-------------|--------------|--------------|---------|
| 1      | 28.922        | HH S | 0.9633      | 2194.71484   | 35.01414     | 5.0715  |
| 2      | 32.103        | HHAS | 1.2199      | 4.10805e4    | 514.30762    | 94.9285 |

Totals : 4.32752e4 549.32176

**Figure S56.**  $^1\text{H}$  NMR spectra (400 MHz, Chloroform-*d*) of (*R*)-*N*-(2-Methyl-1-(3-(trifluoromethoxy)phenyl)allyl)-9*H*-fluoren-9-imine (3ha).

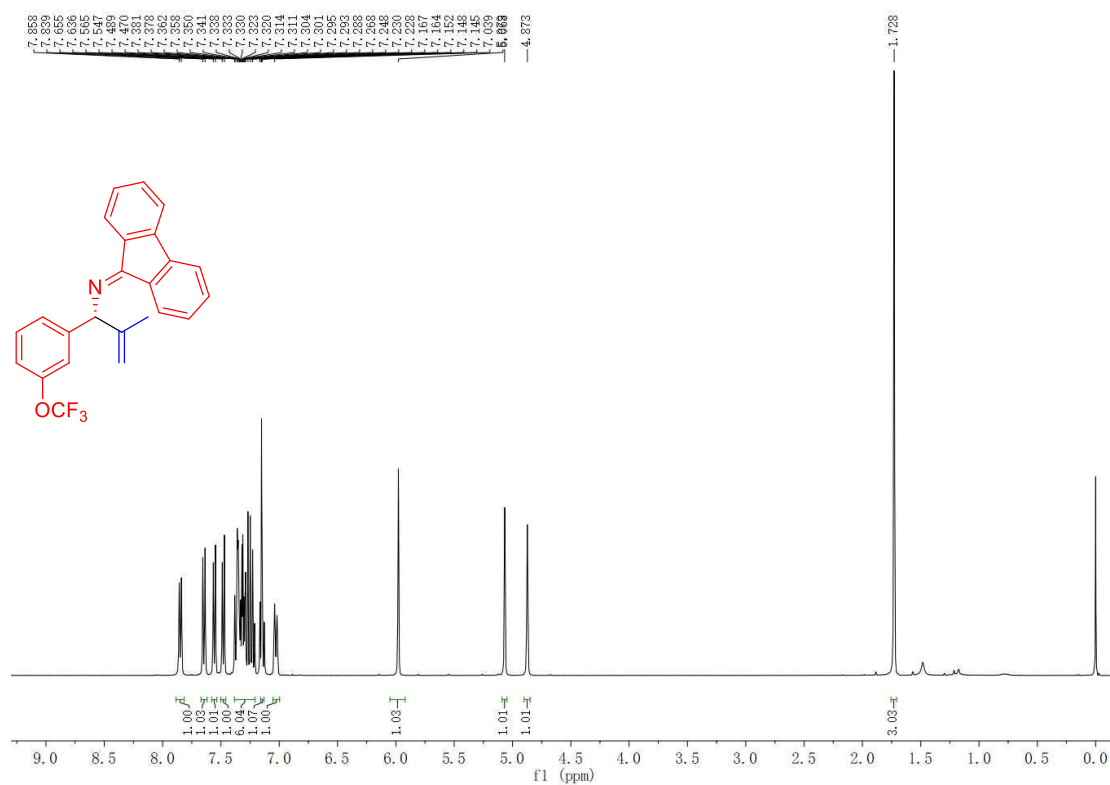

**Figure S57.**  $^{13}\text{C}\{^1\text{H}\}$  NMR spectra (100 MHz, Chloroform-*d*) of (*R*)-*N*-(2-Methyl-1-(3-(trifluoromethoxy)phenyl)allyl)-9*H*-fluoren-9-imine (3ha).

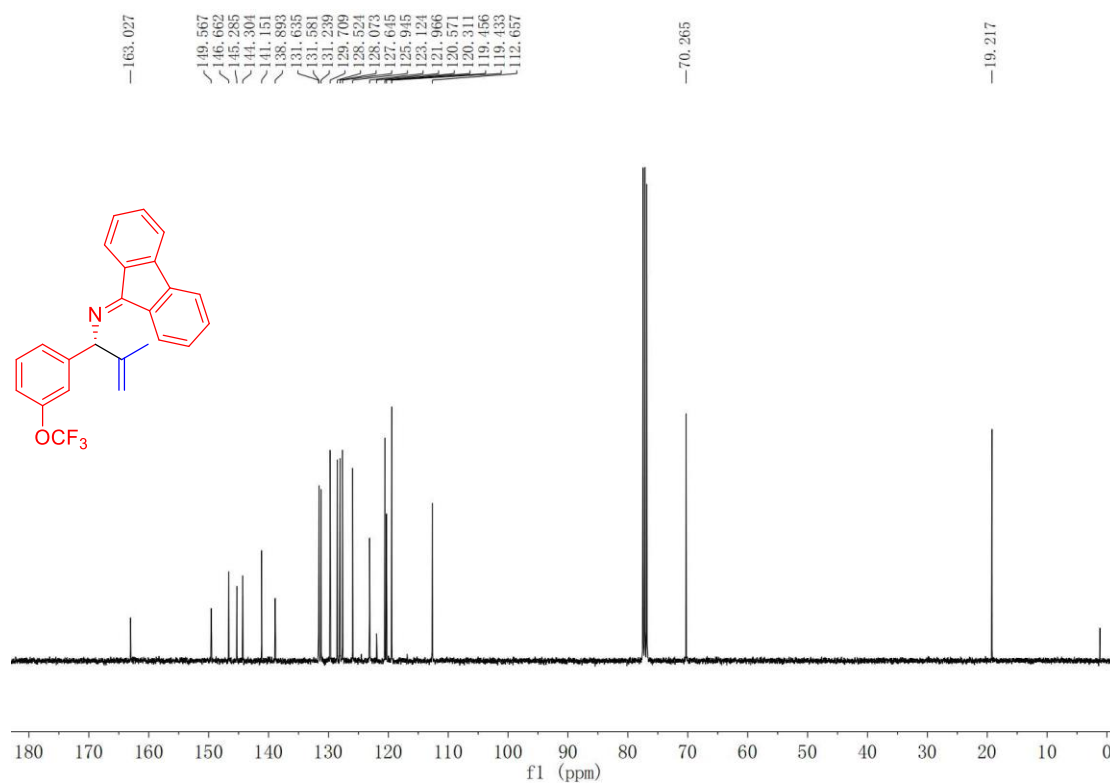

**Figure S58.**  $^{19}\text{F}$  NMR spectra (376 MHz, Chloroform-*d*) of (*R*)-*N*-(2-Methyl-1-(3-(trifluoromethoxy)phenyl)allyl)-9*H*-fluoren-9-imine (3ha).

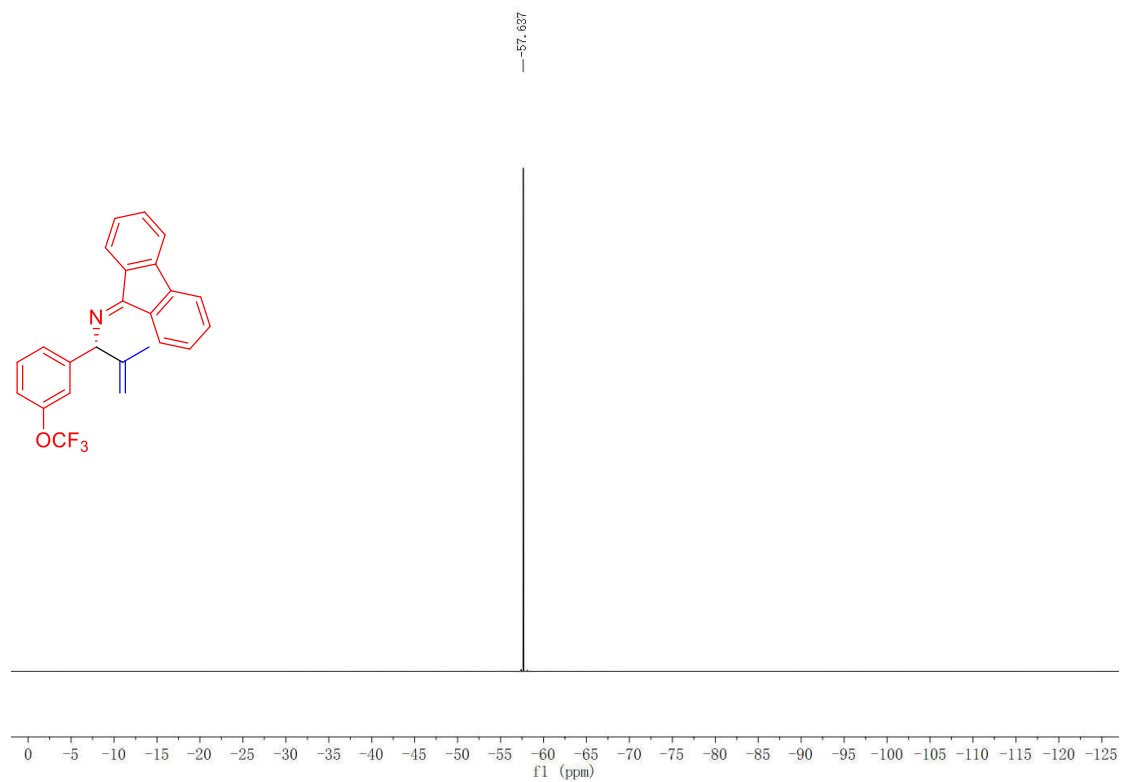

**Figure S59. HPLC Chromatography of the Racemic *N*-(2-Methyl-1-(3-(trifluoromethoxy)phenyl)allyl)-9*H*-fluoren-9-imine (3ha).**

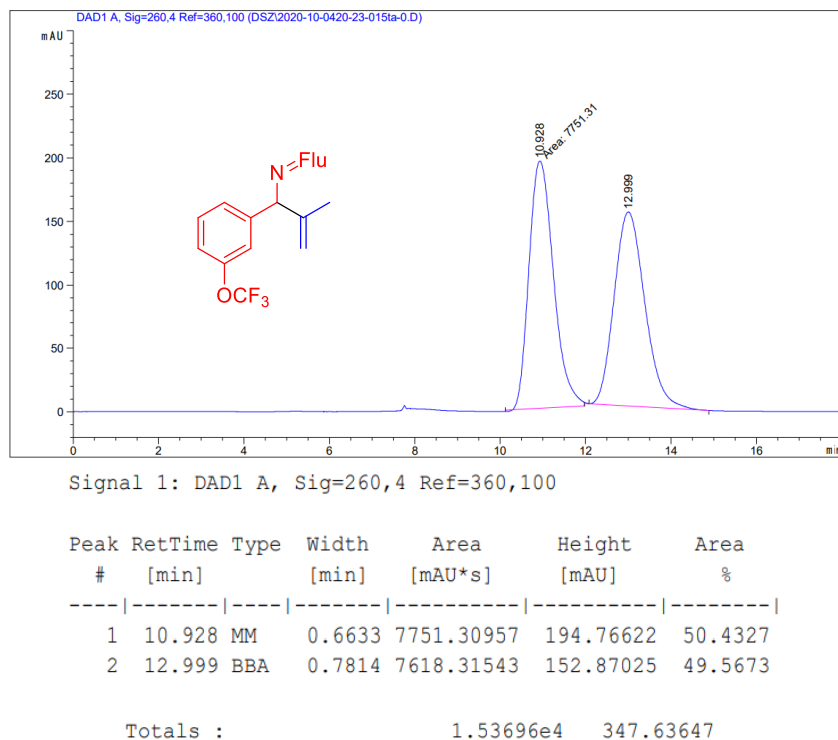

**Figure S60. HPLC Chromatography of (*R*)-*N*-(2-Methyl-1-(3-(trifluoromethoxy)phenyl)allyl)-9*H*-fluoren-9-imine (3ha).**

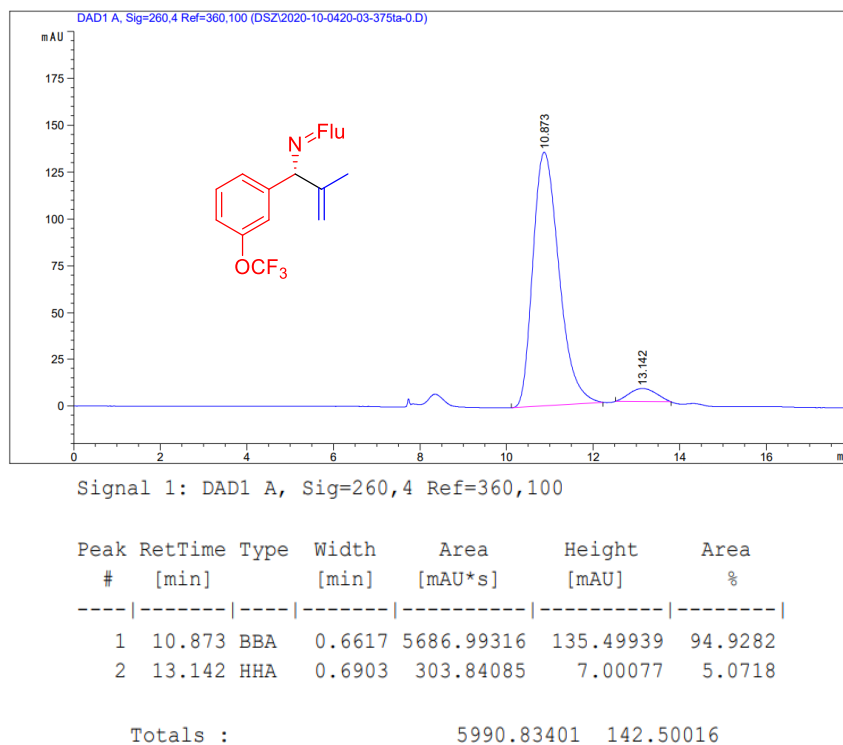

**Figure S61.  $^1\text{H}$  NMR spectra (400 MHz, Chloroform- $d$ ) of (*R*)-*N*-(1-(3,4-Dimethoxyphenyl)-2-methylallyl)-9*H*-fluoren-9-imine (**3ia**).**

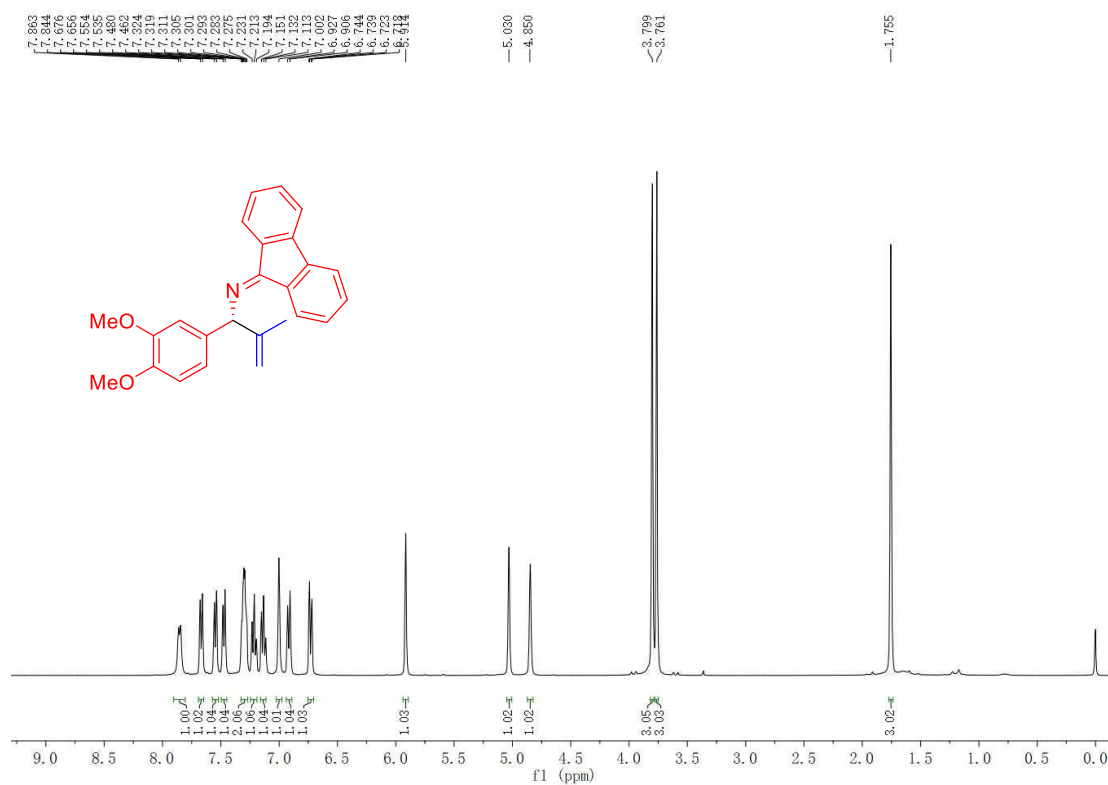

**Figure S62.  $^{13}\text{C}\{^1\text{H}\}$  NMR spectra (100 MHz, Chloroform- $d$ ) of (*R*)-*N*-(1-(3,4-Dimethoxyphenyl)-2-methylallyl)-9*H*-fluoren-9-imine (**3ia**).**

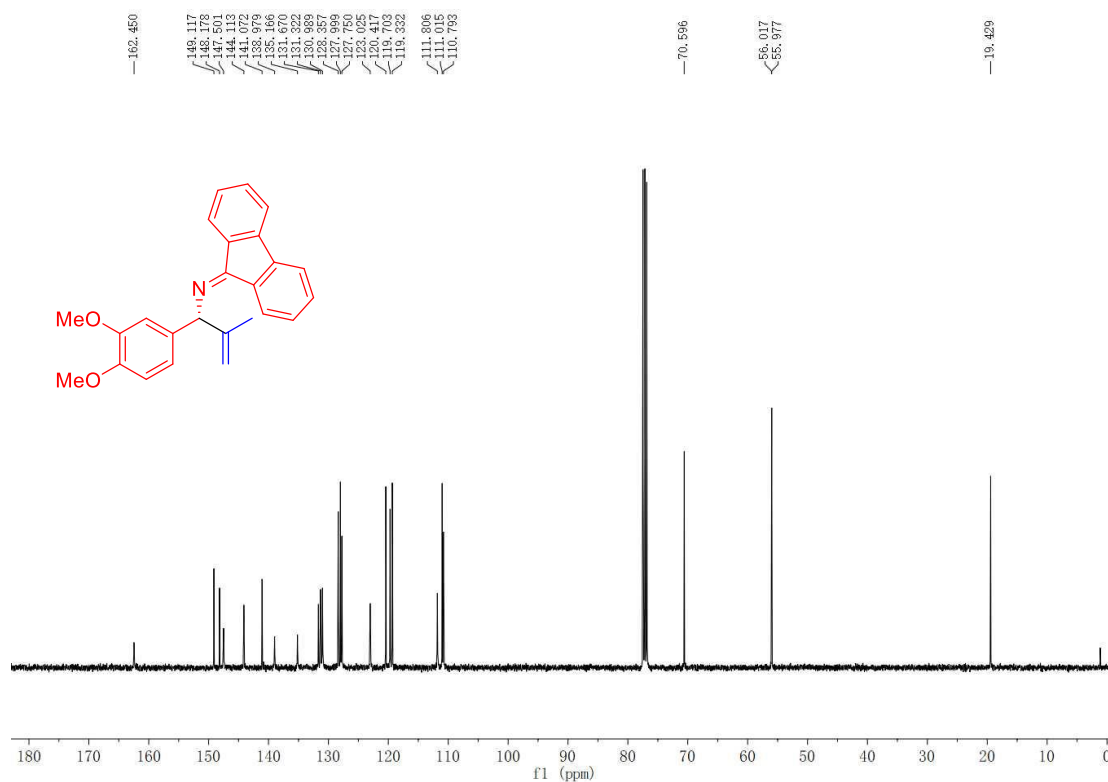

**Figure S63. HPLC Chromatography of the Racemic *N*-(1-(3,4-Dimethoxyphenyl)-2-methylallyl)-9*H*-fluoren-9-imine (3ia).**

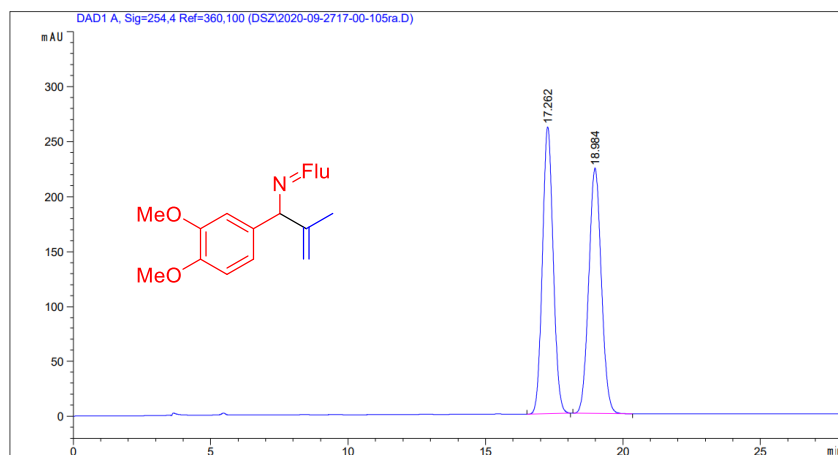

Signal 1: DAD1 A, Sig=254,4 Ref=360,100

| Peak # | RetTime [min] | Type | Width [min] | Area [mAU*s] | Height [mAU] | Area %  |
|--------|---------------|------|-------------|--------------|--------------|---------|
| 1      | 17.262        | BBA  | 0.4256      | 7105.77441   | 260.99222    | 49.9298 |
| 2      | 18.984        | BBA  | 0.4923      | 7125.75049   | 223.27022    | 50.0702 |

Totals : 1.42315e4 484.26244

**Figure S64 HPLC Chromatography of (*R*)-*N*-(1-(3,4-Dimethoxyphenyl)-2-methylallyl)- 9*H*-fluoren-9-imine (3ia).**

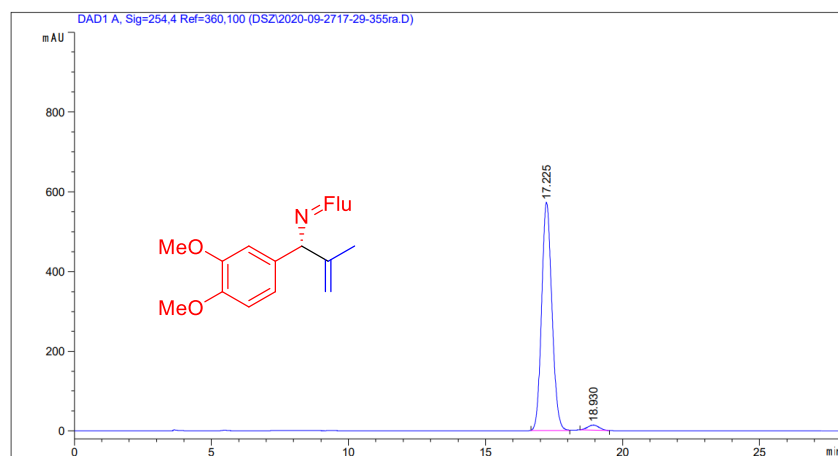

Signal 1: DAD1 A, Sig=254,4 Ref=360,100

| Peak # | RetTime [min] | Type | Width [min] | Area [mAU*s] | Height [mAU] | Area %  |
|--------|---------------|------|-------------|--------------|--------------|---------|
| 1      | 17.225        | HHA  | 0.4045      | 1.49467e4    | 572.70648    | 97.5722 |
| 2      | 18.930        | HHA  | 0.4616      | 371.90195    | 12.70270     | 2.4278  |

Totals : 1.53186e4 585.40918

**Figure S65.**  $^1\text{H}$  NMR spectra (400 MHz, Chloroform-*d*) of (*R*)-*N*-(2-Methyl-1-(*o*-tolyl)allyl)-9*H*-fluoren-9-imine (**3ja**).

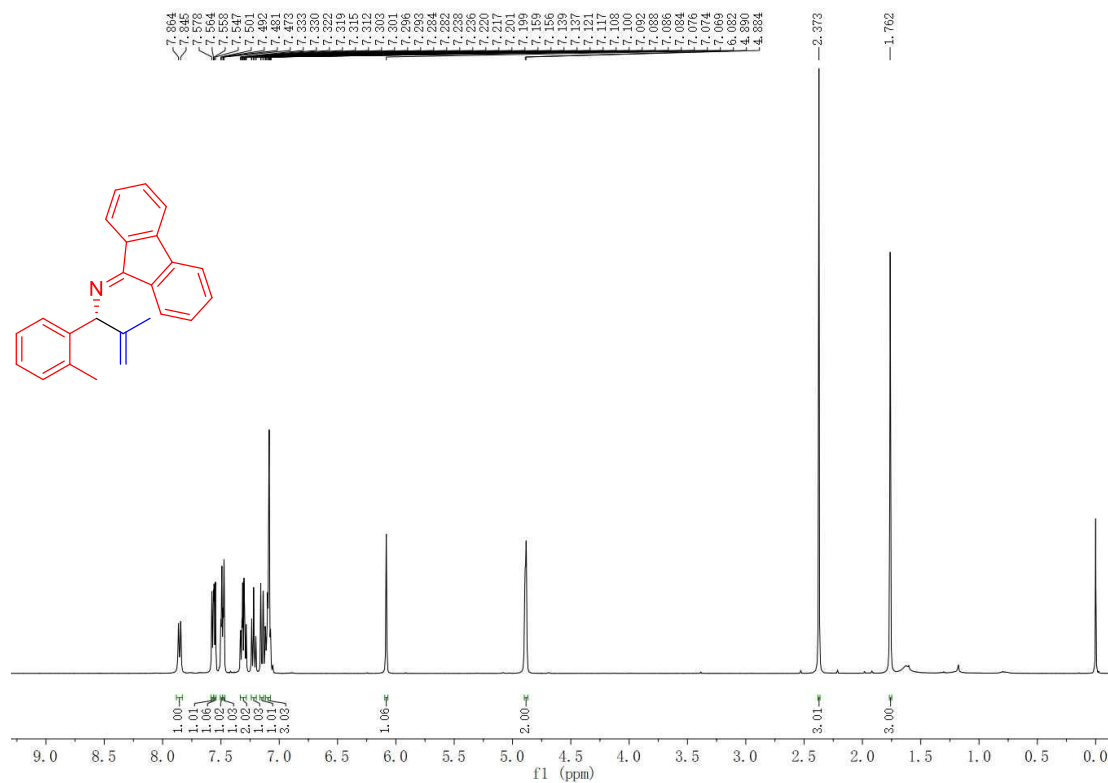

**Figure S66.**  $^{13}\text{C}\{^1\text{H}\}$  NMR spectra (100 MHz, Chloroform-*d*) of (*R*)-*N*-(2-Methyl-1-(*o*-tolyl) allyl)-9*H*-fluoren-9-imine (**3ja**).

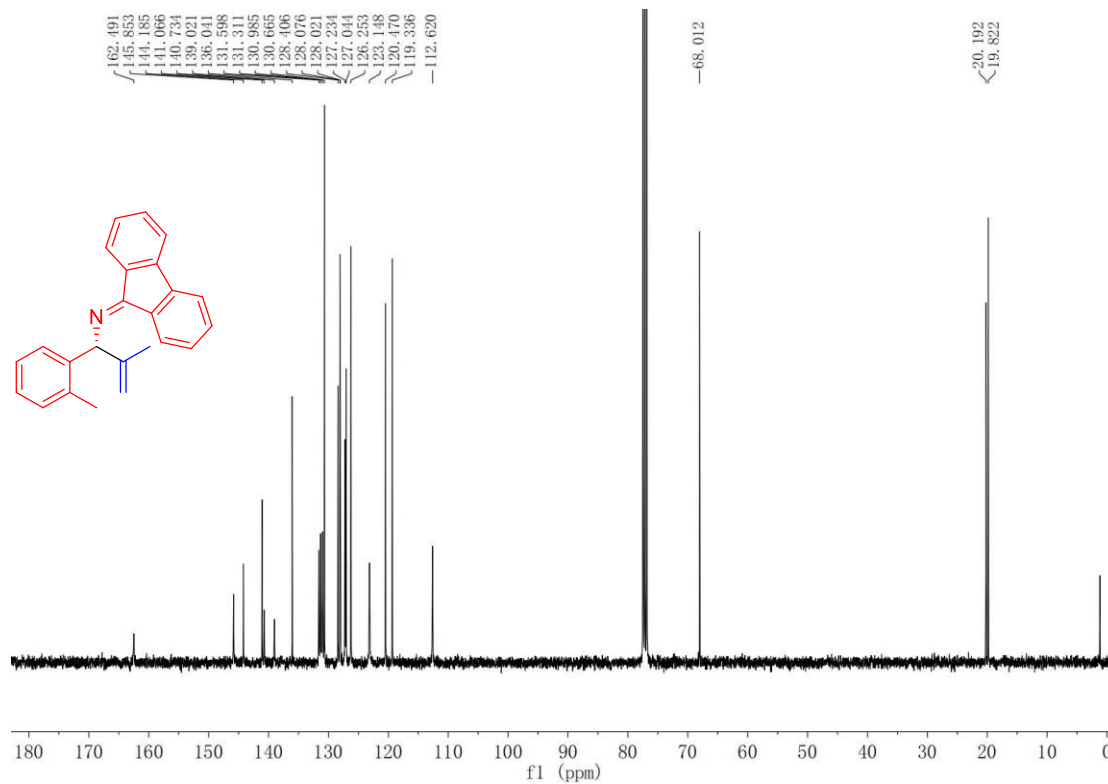

**Figure S67. HPLC Chromatography of the Racemic *N*-(2-Methyl-1-(*o*-tolyl)allyl)-9*H*-fluoren-9-imine (3ja).**

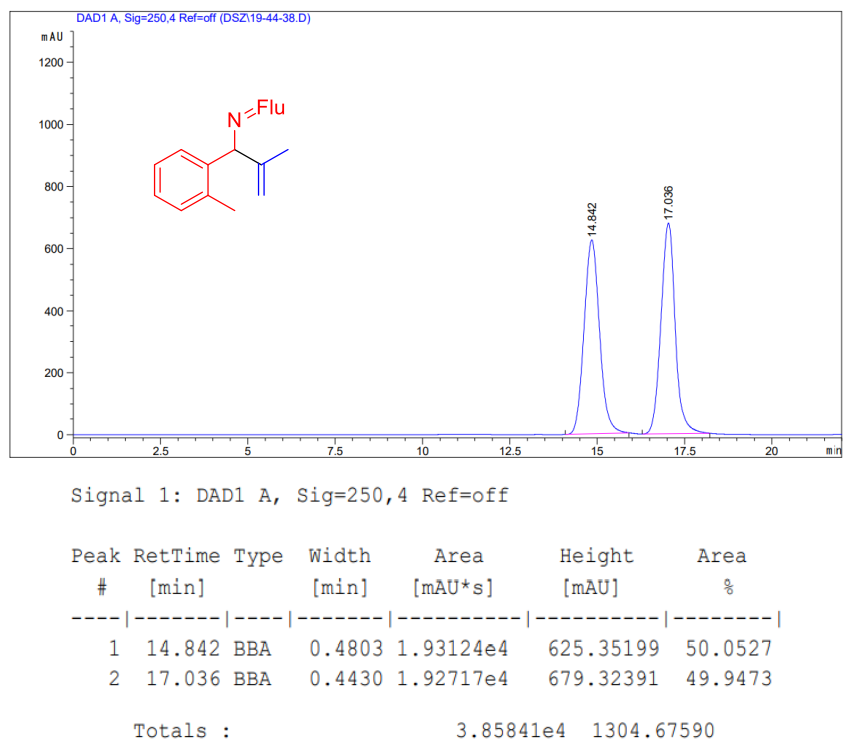

**Figure S68. HPLC Chromatography of (*R*)-*N*-(2-Methyl-1-(*o*-tolyl)allyl)-9*H*-fluoren-9-imine (3ja).**

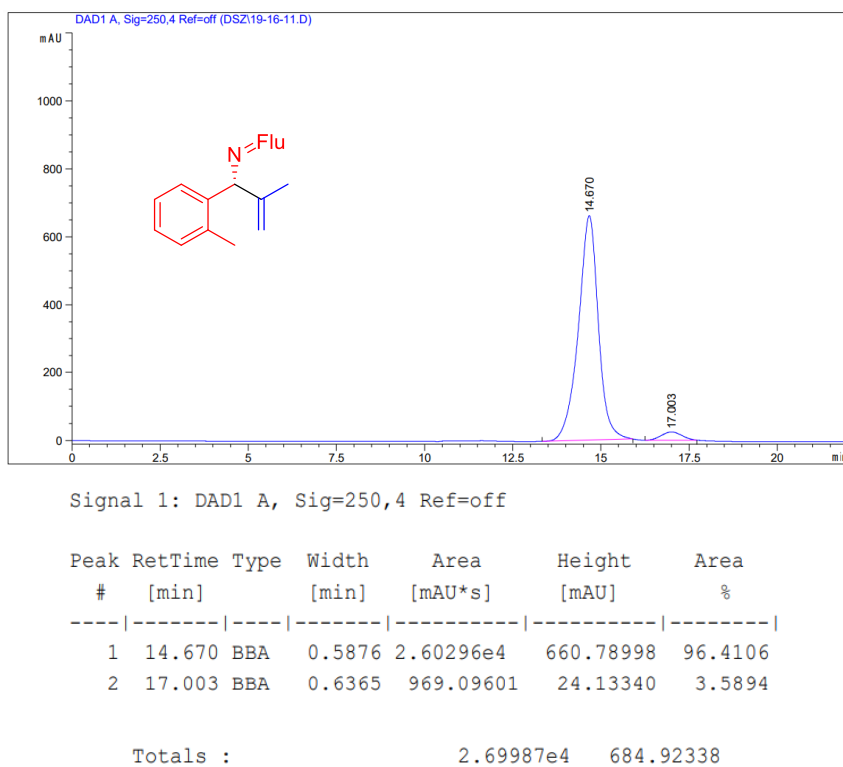





**Figure S71. HPLC Chromatography of the Racemic *N*-(2-Methyl-1-(naphthalen-1-yl)allyl)-9*H*-fluoren-9-imine (3ka).**

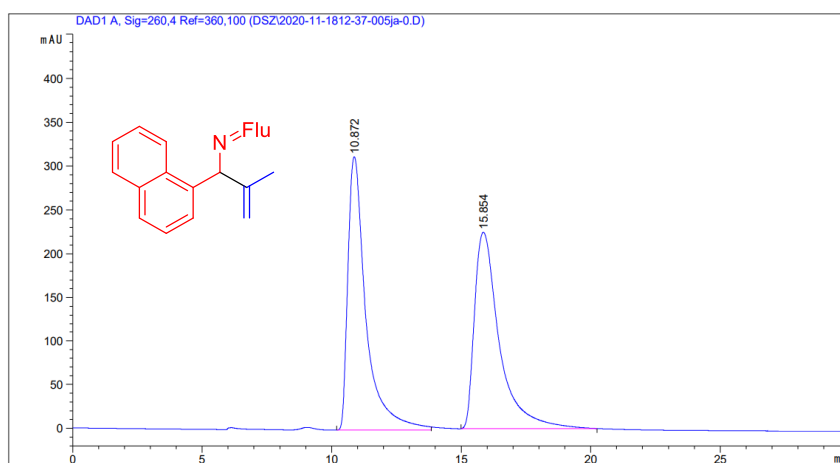

Signal 1: DAD1 A, Sig=260,4 Ref=360,100

| Peak # | RetTime [min] | Type | Width [min] | Area [mAU*s] | Height [mAU] | Area %  |
|--------|---------------|------|-------------|--------------|--------------|---------|
| 1      | 10.872        | HHA  | 0.7275      | 1.52150e4    | 312.79388    | 50.2907 |
| 2      | 15.854        | HHA  | 1.0114      | 1.50391e4    | 225.11456    | 49.7093 |

Totals : 3.02542e4 537.90845

**Figure S72. HPLC Chromatography of (*R*)-*N*-(2-Methyl-1-(naphthalen-1-yl)allyl)-9*H*-fluoren-9-imine (3ka).**

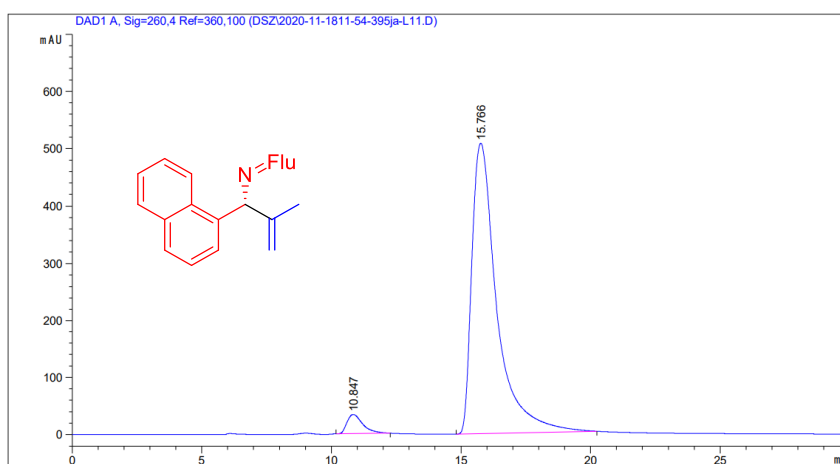

Signal 1: DAD1 A, Sig=260,4 Ref=360,100

| Peak # | RetTime [min] | Type | Width [min] | Area [mAU*s] | Height [mAU] | Area %  |
|--------|---------------|------|-------------|--------------|--------------|---------|
| 1      | 10.847        | HBA  | 0.6551      | 1420.48242   | 33.47132     | 4.0045  |
| 2      | 15.766        | BBA  | 1.0145      | 3.40521e4    | 507.67627    | 95.9955 |

Totals : 3.54726e4 541.14759

**Figure S73.**  $^1\text{H}$  NMR spectra (400 MHz, Chloroform-*d*) of (*R*)-*N*-(1-(2,3-Dihydrobenzofuran-5-yl)-2-methylallyl)-9*H*-fluoren-9-imine (**3la**).

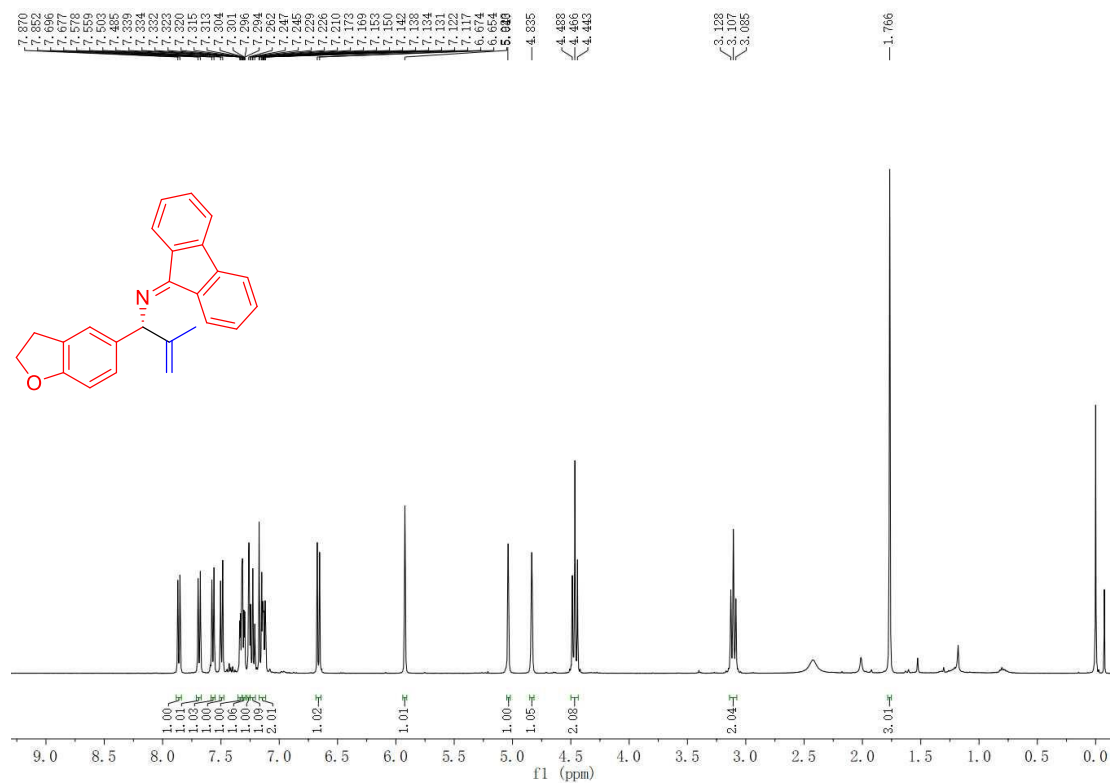

**Figure S74.**  $^{13}\text{C}\{^1\text{H}\}$  NMR spectra (100 MHz, Chloroform-*d*) of (*R*)-*N*-(1-(2,3-Dihydrobenzofuran-5-yl)-2-methylallyl)-9*H*-fluoren-9-imine (**3la**).

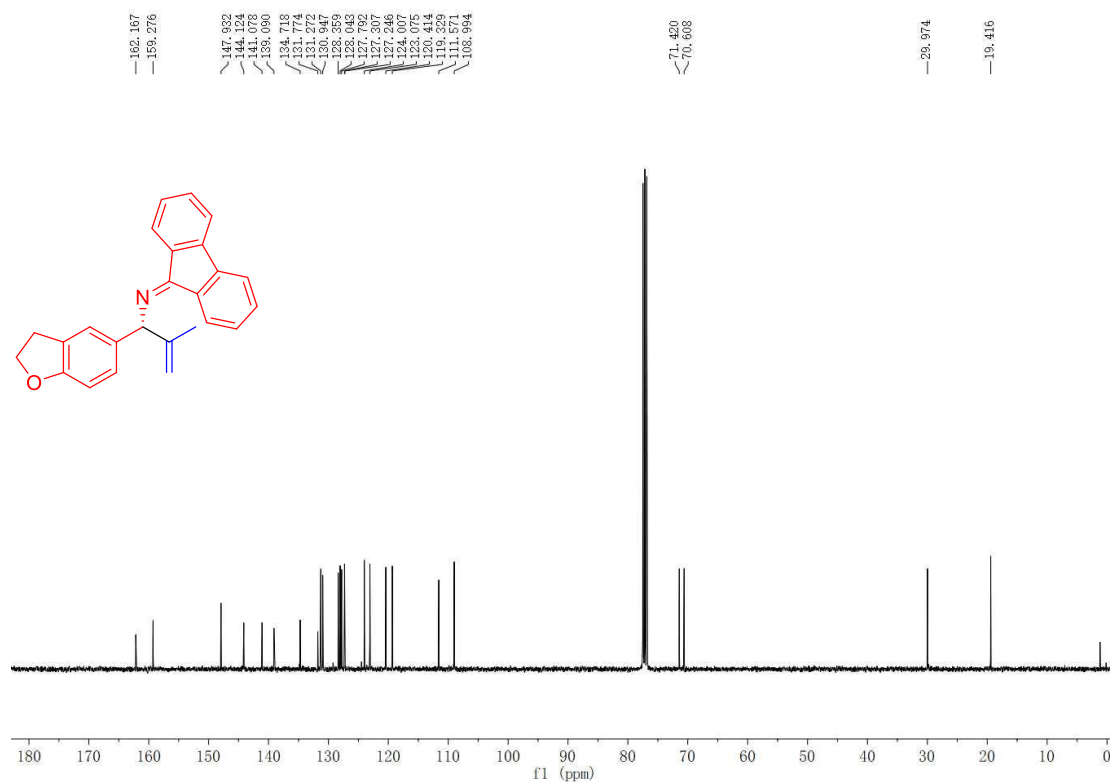

**Figure S75. HPLC Chromatography of the Racemic *N*-(1-(2,3-Dihydrobenzofuran-5-yl)-2-methylallyl)-9*H*-fluoren-9-imine (3la).**

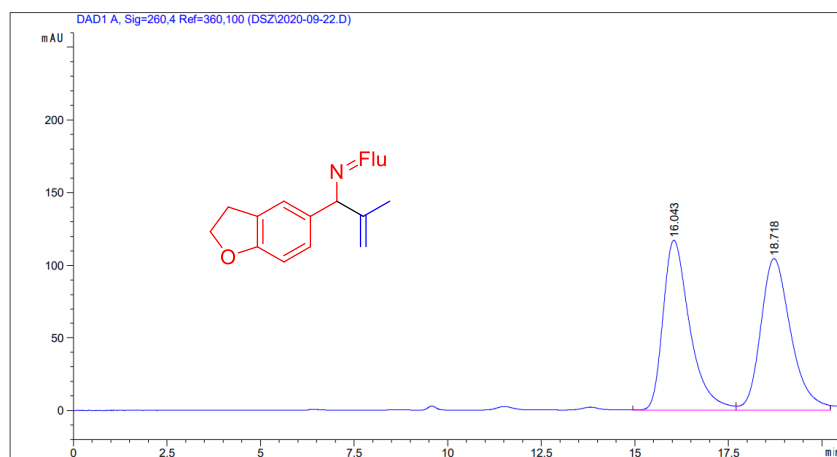

Signal 1: DAD1 A, Sig=260,4 Ref=360,100

| Peak # | RetTime [min] | Type | Width [min] | Area [mAU*s] | Height [mAU] | Area %  |
|--------|---------------|------|-------------|--------------|--------------|---------|
| 1      | 16.043        | HH   | 0.7548      | 5807.16650   | 117.05287    | 49.9021 |
| 2      | 18.718        | HHA  | 0.8592      | 5829.95605   | 104.44483    | 50.0979 |

Totals : 1.16371e4 221.49770

**Figure S76. HPLC Chromatography of (*R*)-*N*-(1-(2,3-Dihydrobenzofuran-5-yl)-2-methylallyl)-9*H*-fluoren-9-imine (3la).**

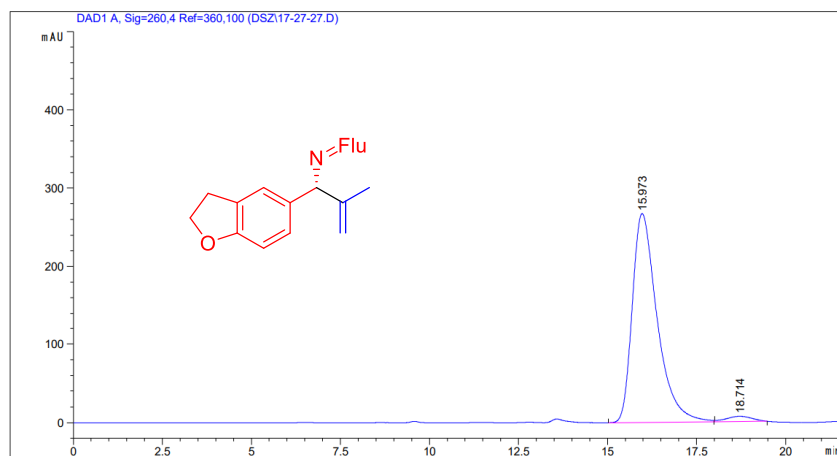

Signal 1: DAD1 A, Sig=260,4 Ref=360,100

| Peak # | RetTime [min] | Type | Width [min] | Area [mAU*s] | Height [mAU] | Area %  |
|--------|---------------|------|-------------|--------------|--------------|---------|
| 1      | 15.973        | BF   | 0.7344      | 1.29496e4    | 266.73911    | 97.5145 |
| 2      | 18.714        | HBA  | 0.7565      | 330.07373    | 6.63313      | 2.4855  |

Totals : 1.32797e4 273.37224

**Figure S77.**  $^1\text{H}$  NMR spectra (400 MHz, Chloroform- $d$ ) of (*R*)-*N*-(1-(2,6-Dimethoxypyridin-3-yl)-2-methylallyl)-9*H*-fluoren-9-imine (**3ma**).

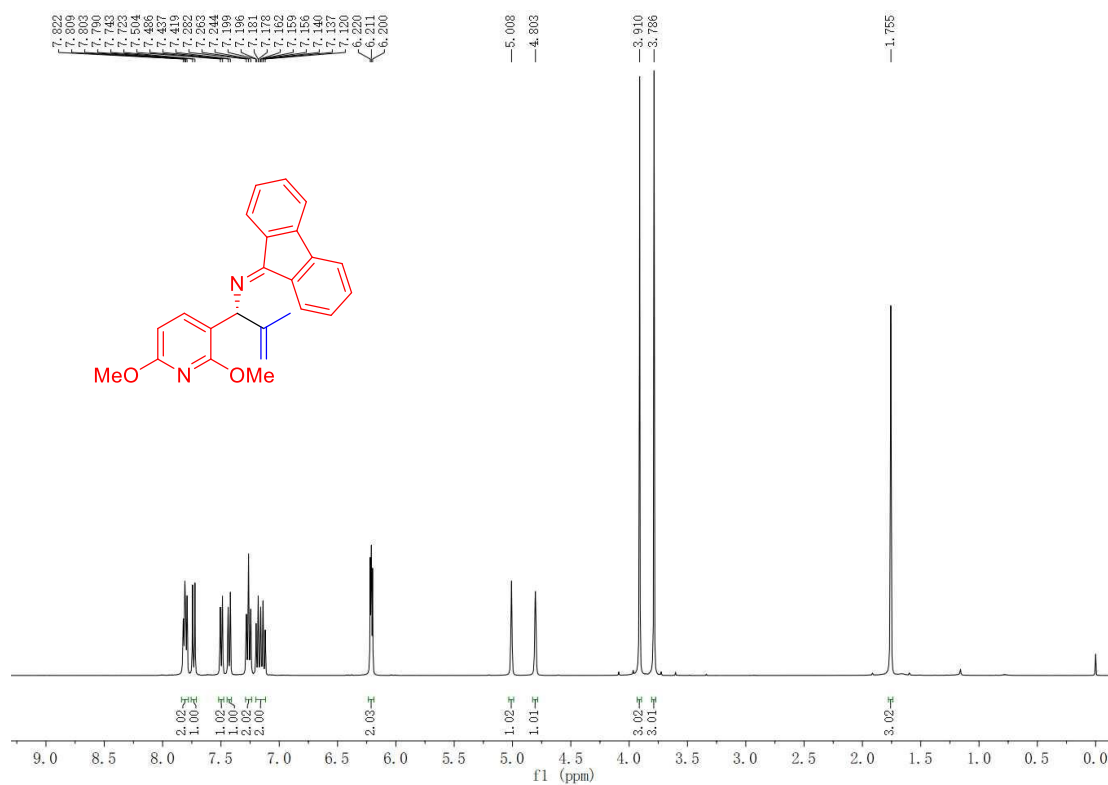

**Figure S78.**  $^{13}\text{C}\{^1\text{H}\}$  NMR spectra (100 MHz, Chloroform- $d$ ) of (*R*)-*N*-(1-(2,6-Dimethoxypyridin-3-yl)-2-methylallyl)-9*H*-fluoren-9-imine (**3ma**).

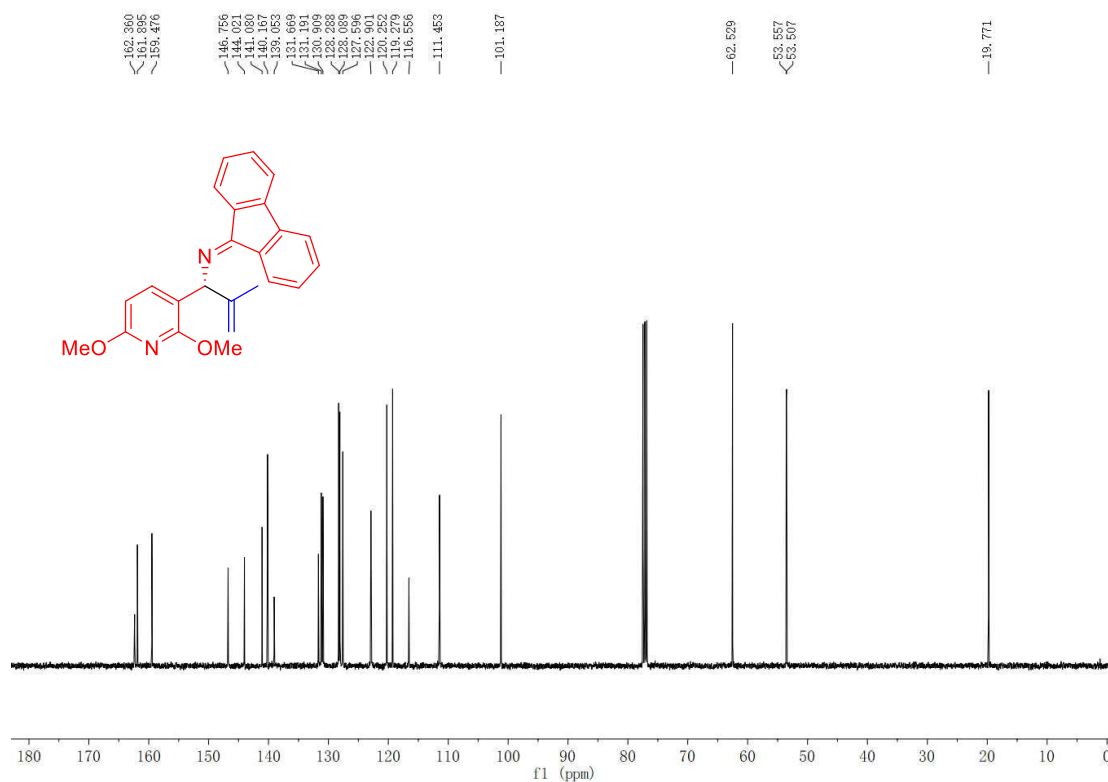

**Figure S79. HPLC Chromatography of the Racemic *N*-(1-(2,6-Dimethoxypyridin-3-yl)-2-methylallyl)-9*H*-fluoren-9-imine (3ma).**

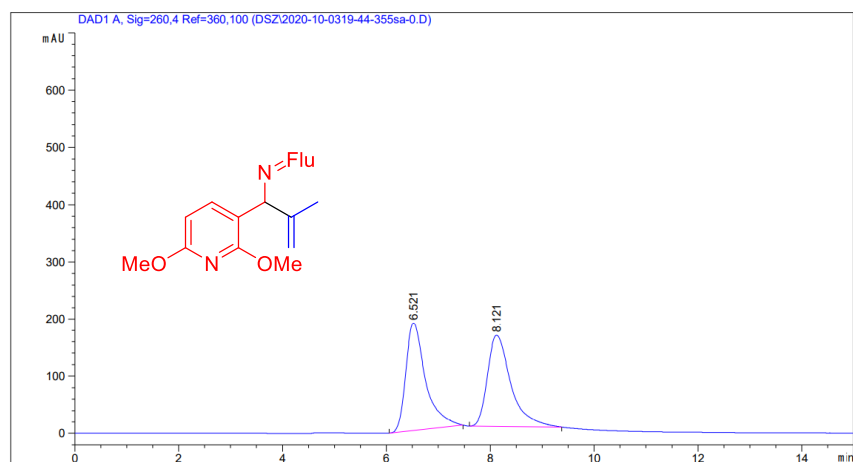

Signal 1: DAD1 A, Sig=260,4 Ref=360,100

| Peak # | RetTime [min] | Type | Width [min] | Area [mAU*s] | Height [mAU] | Area %  |
|--------|---------------|------|-------------|--------------|--------------|---------|
| 1      | 6.521         | BBA  | 0.3978      | 4994.41992   | 188.10025    | 49.9315 |
| 2      | 8.121         | BBA  | 0.4749      | 5008.11377   | 159.23732    | 50.0685 |

Totals : 1.00025e4 347.33757

**Figure S80. HPLC Chromatography of (*R*)-*N*-(1-(2,6-Dimethoxypyridin-3-yl)-2-methylallyl)-9*H*-fluoren-9-imine (3ma).**

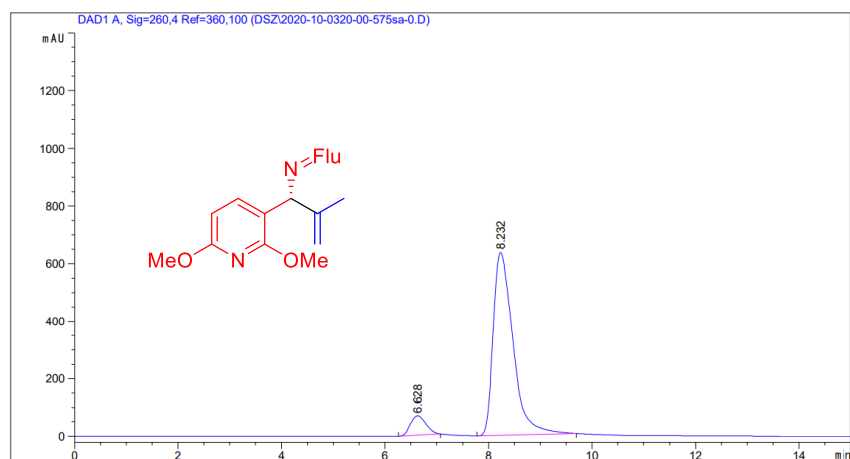

Signal 1: DAD1 A, Sig=260,4 Ref=360,100

| Peak # | RetTime [min] | Type | Width [min] | Area [mAU*s] | Height [mAU] | Area %  |
|--------|---------------|------|-------------|--------------|--------------|---------|
| 1      | 6.628         | BBA  | 0.3326      | 1401.51318   | 66.84074     | 7.6560  |
| 2      | 8.232         | BBA  | 0.4225      | 1.69045e4    | 635.23511    | 92.3440 |

Totals : 1.83060e4 702.07584

**Figure S81**  $^1\text{H}$  NMR spectra (400 MHz, Chloroform-*d*) of (*R*)-*N*-(1-(Furan-3-yl)-2-methylallyl)-9*H*-fluoren-9-imine (**3na**).

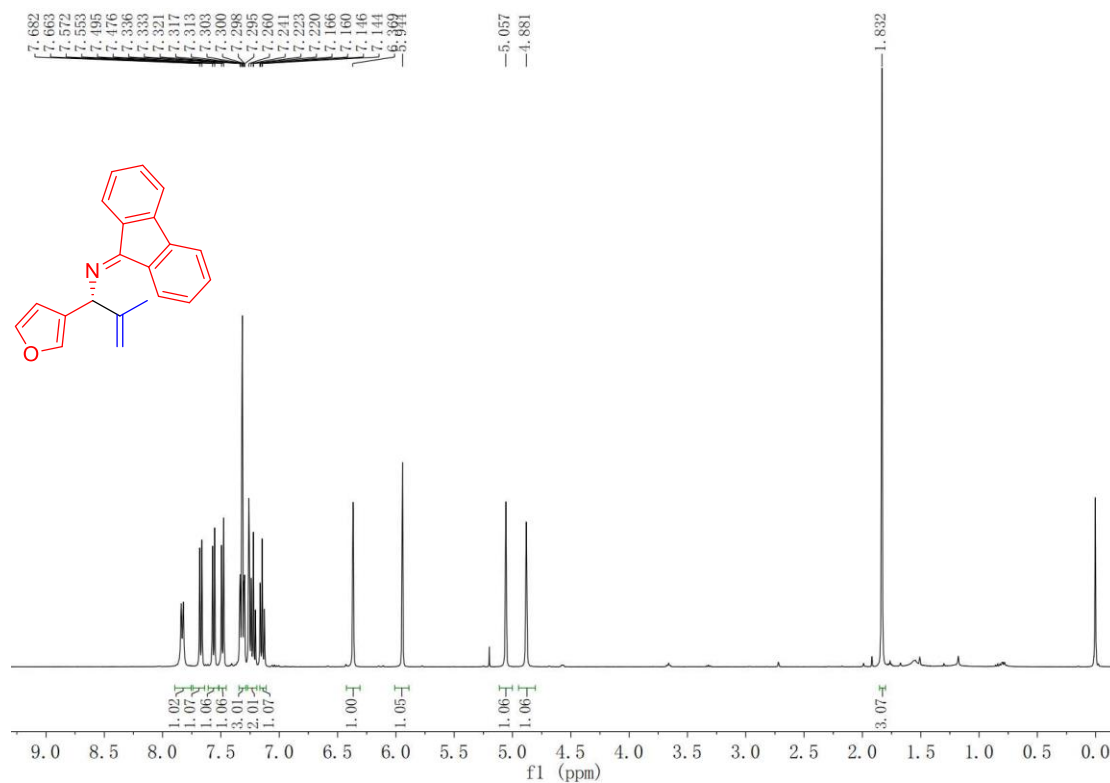

**Figure S82.**  $^{13}\text{C}\{^1\text{H}\}$  NMR spectra (400 MHz, Chloroform-*d*) of (*R*)-*N*-(1-(Furan-3-yl)-2-methylallyl)-9*H*-fluoren-9-imine (**3na**).

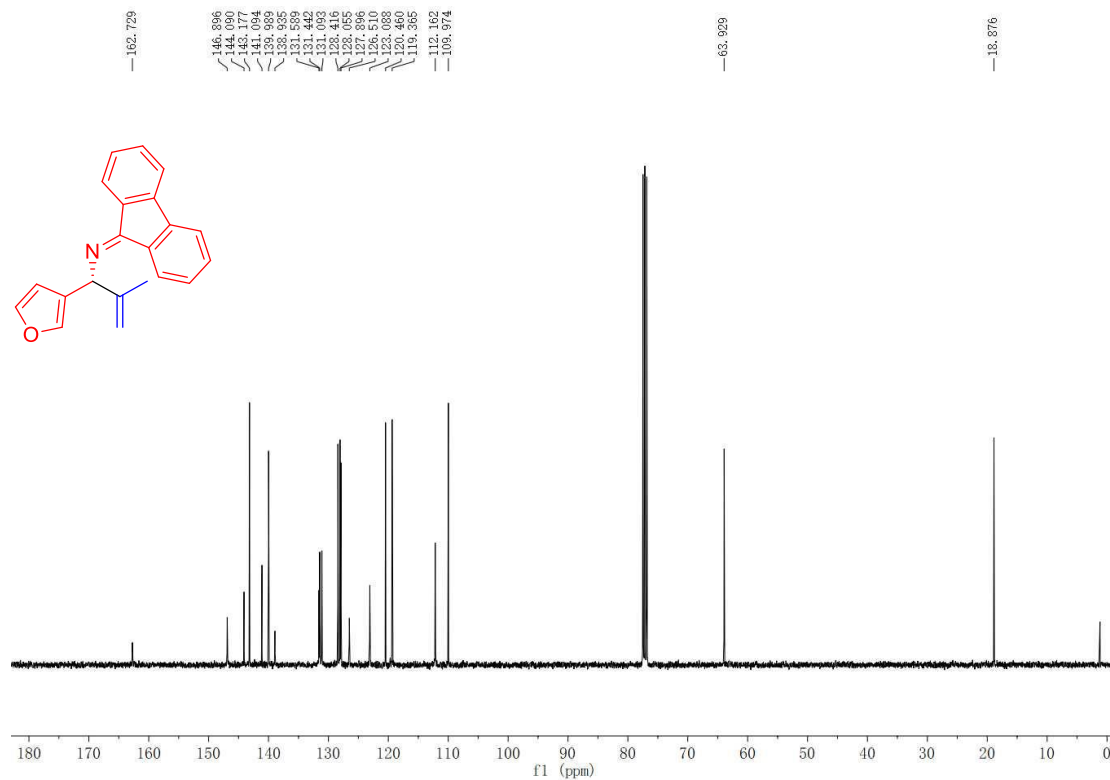

**Figure S83. HPLC Chromatography of the Racemic *N*-(1-(Furan-3-yl)-2-methylallyl)-9*H*-fluoren-9-imine (3na).**

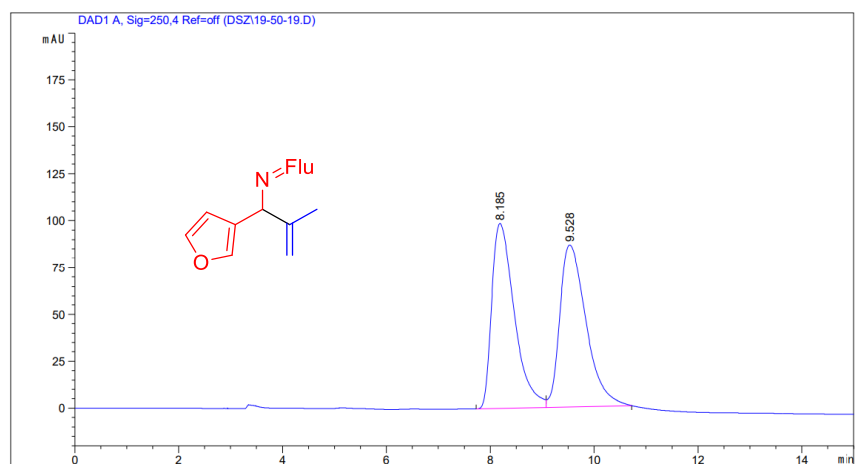

Signal 1: DAD1 A, Sig=250,4 Ref=off

| Peak # | RetTime [min] | Type | Width [min] | Area [mAU*s] | Height [mAU] | Area %  |
|--------|---------------|------|-------------|--------------|--------------|---------|
| 1      | 8.185         | BV   | 0.4718      | 2989.34326   | 98.56075     | 49.5632 |
| 2      | 9.528         | VBA  | 0.5482      | 3042.03516   | 86.51473     | 50.4368 |

Totals : 6031.37842 185.07549

**Figure S84. HPLC Chromatography of (*R*)-*N*-(1-(Furan-3-yl)-2-methylallyl)-9*H*-fluoren-9-imine (3na).**

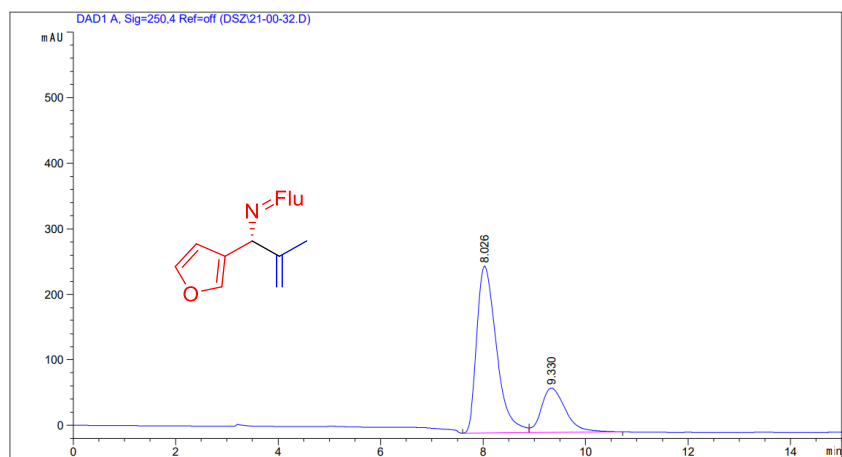

Signal 1: DAD1 A, Sig=250,4 Ref=off

| Peak # | RetTime [min] | Type | Width [min] | Area [mAU*s] | Height [mAU] | Area %  |
|--------|---------------|------|-------------|--------------|--------------|---------|
| 1      | 8.026         | BV   | 0.4163      | 6839.08350   | 255.49373    | 75.5315 |
| 2      | 9.330         | VBA  | 0.5039      | 2215.52588   | 67.67581     | 24.4685 |

Totals : 9054.60938 323.16954



**Figure S85.  $^1\text{H}$  NMR spectra (400 MHz, Chloroform-*d*) of (*R*)-*N*-(1-Phenylallyl)-9*H*-fluorene-9-imine (**3ab**).**

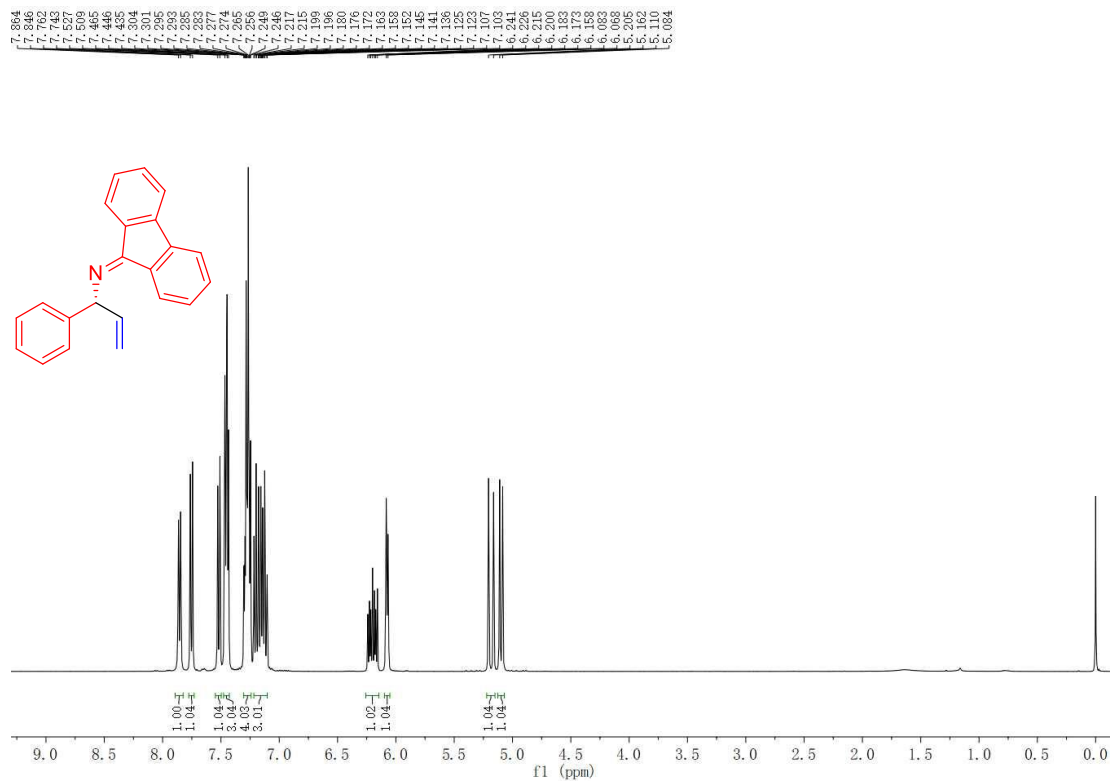

**Figure S86.  $^{13}\text{C}\{^1\text{H}\}$  NMR spectra (100 MHz, Chloroform-*d*) of (*R*)-*N*-(1-Phenylallyl)-9*H*-fluorene-9-imine (**3ab**).**

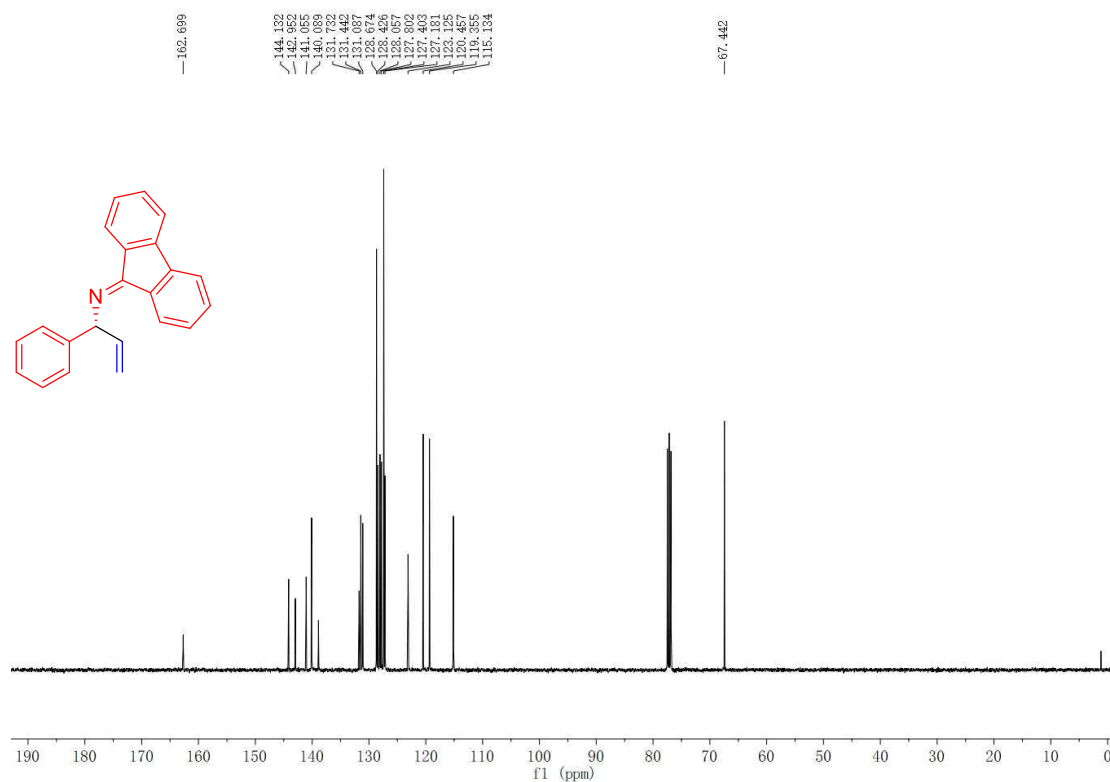

**Figure S87. HPLC Chromatography of the Racemic *N*-(1-Phenylallyl)-9*H*-fluoren-9-imine (3ab).**

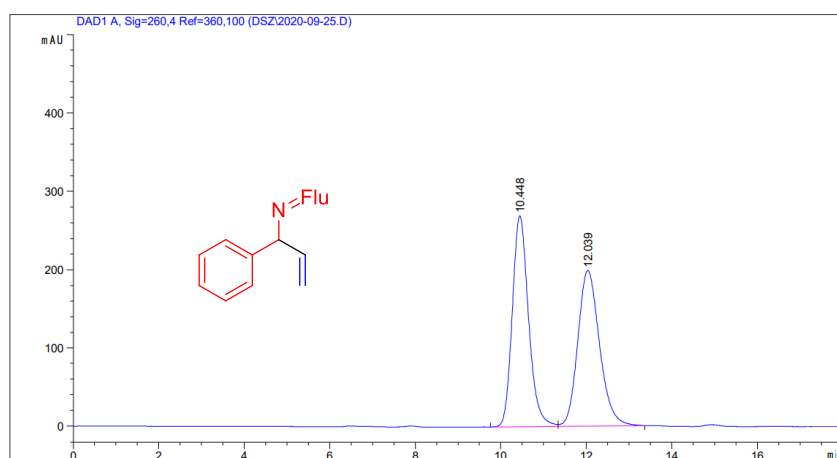

Signal 1: DAD1 A, Sig=260,4 Ref=360,100

| Peak # | RetTime [min] | Type | Width [min] | Area [mAU*s] | Height [mAU] | Area %  |
|--------|---------------|------|-------------|--------------|--------------|---------|
| 1      | 10.448        | BV   | 0.4081      | 7119.98877   | 269.60492    | 50.3271 |
| 2      | 12.039        | VBA  | 0.5472      | 7027.43799   | 199.37094    | 49.6729 |

Totals : 1.41474e4 468.97586

**Figure S88. HPLC Chromatography of (*R*)-*N*-(1-Phenylallyl)-9*H*-fluoren-9-imine (3ab).**

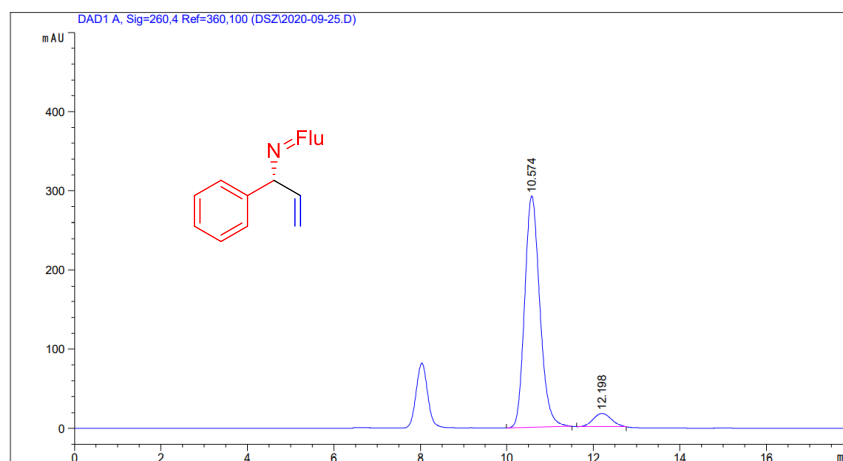

Signal 1: DAD1 A, Sig=260,4 Ref=360,100

| Peak # | RetTime [min] | Type | Width [min] | Area [mAU*s] | Height [mAU] | Area %  |
|--------|---------------|------|-------------|--------------|--------------|---------|
| 1      | 10.574        | BBA  | 0.3790      | 7144.65186   | 292.43661    | 93.3017 |
| 2      | 12.198        | BHAS | 0.4677      | 512.92401    | 17.40985     | 6.6983  |

Totals : 7657.57587 309.84647



**Figure S91. HPLC Chromatography of the Racemic *N*-(2-Methylene-1-phenylbutyl)-9*H*-fluoren-9-imine (3ac).**

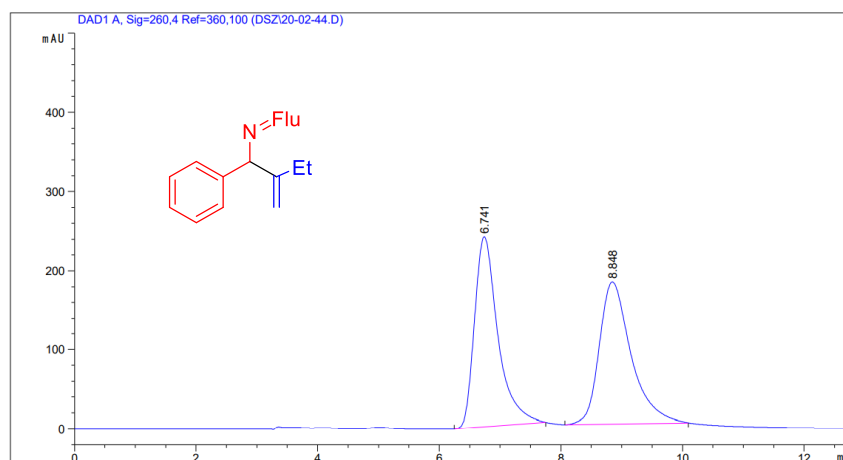

Signal 1: DAD1 A, Sig=260,4 Ref=360,100

| Peak # | RetTime [min] | Type | Width [min] | Area [mAU*s] | Height [mAU] | Area %  |
|--------|---------------|------|-------------|--------------|--------------|---------|
| 1      | 6.741         | BBA  | 0.4080      | 6423.00879   | 240.15022    | 49.6733 |
| 2      | 8.848         | BBA  | 0.5462      | 6507.48730   | 179.80382    | 50.3267 |

Totals : 1.29305e4 419.95404

**Figure S92. HPLC Chromatography of (*R*)-*N*-(2-Methylene-1-phenylbutyl)-9*H*-fluoren-9-imine (3ac).**

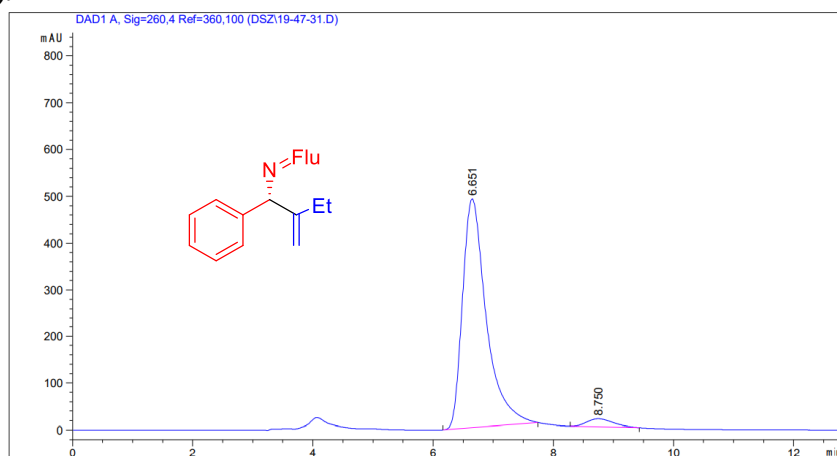

Signal 1: DAD1 A, Sig=260,4 Ref=360,100

| Peak # | RetTime [min] | Type | Width [min] | Area [mAU*s] | Height [mAU] | Area %  |
|--------|---------------|------|-------------|--------------|--------------|---------|
| 1      | 6.651         | BBA  | 0.4150      | 1.34653e4    | 489.41470    | 96.3257 |
| 2      | 8.750         | BBA  | 0.4732      | 513.63373    | 16.77465     | 3.6743  |

Totals : 1.39790e4 506.18936

**Figure S93.**  $^1\text{H}$  NMR spectra (400 MHz, Chloroform-*d*) of (*R,E*)-*N*-(2-Methyl-1-phenylbut-2-en-1-yl)-9*H*-fluoren-9-imine (**3ad**).

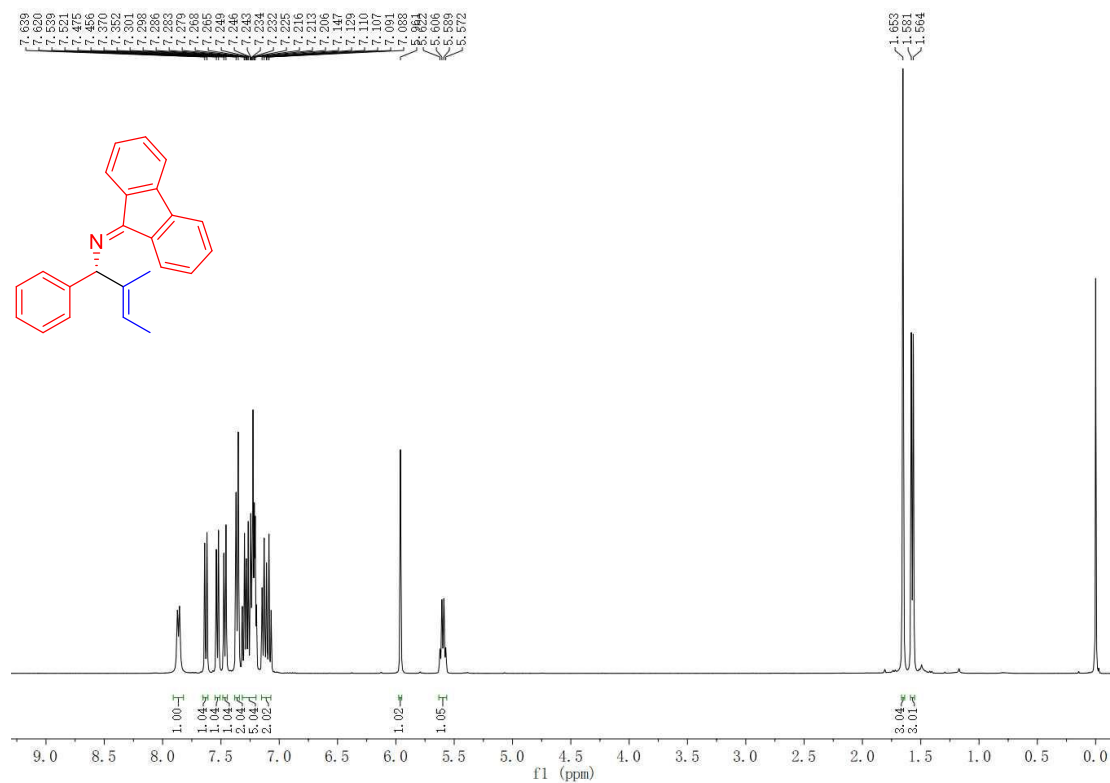

**Figure S94.**  $^{13}\text{C}\{^1\text{H}\}$  NMR spectra (100 MHz, Chloroform-*d*) of (*R,E*)-*N*-(2-Methyl-1-phenylbut-2-en-1-yl)-9*H*-fluoren-9-imine (**3ad**).

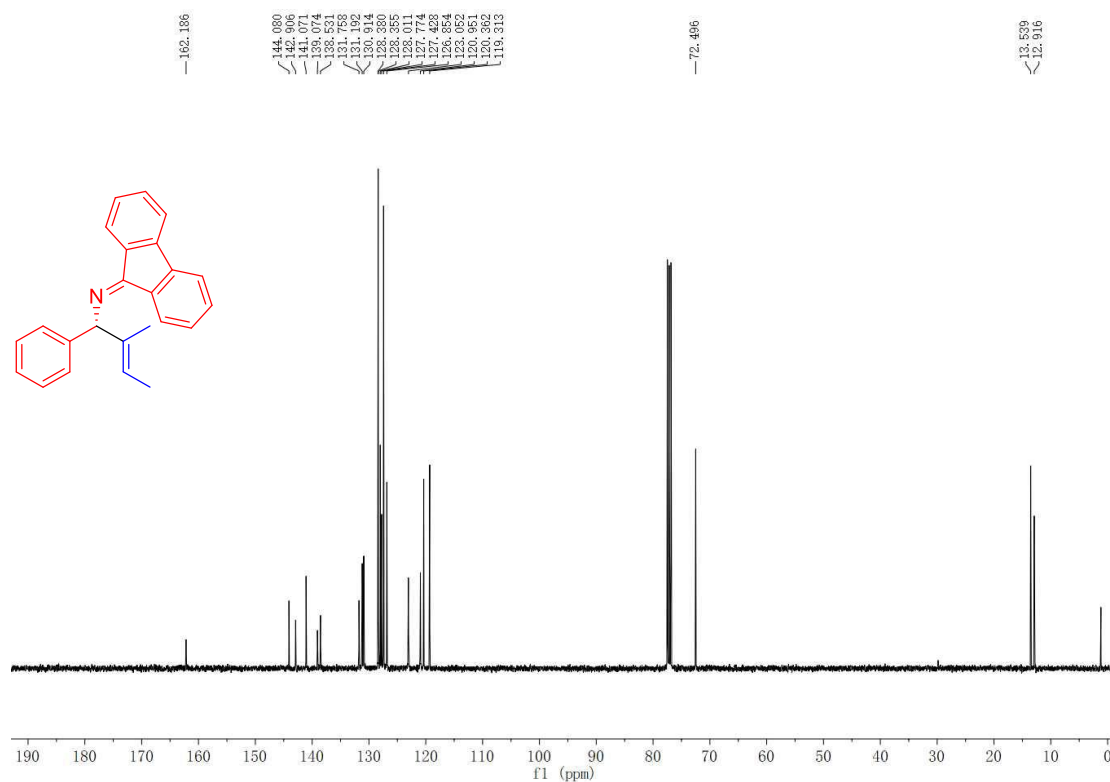

**Figure S95. HPLC Chromatography of the Racemic (*E*)-*N*-(2-Methyl-1-phenylbut-2-en-1-yl)-9*H*-fluoren-9-imine (3ad).**

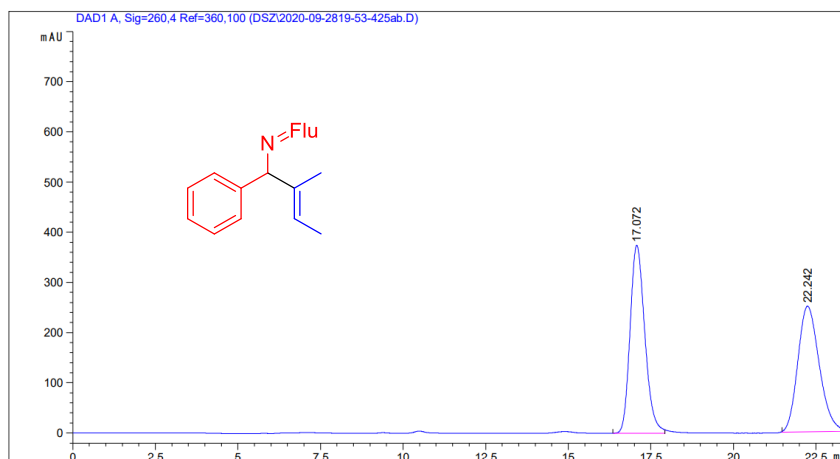

Signal 1: DAD1 A, Sig=260,4 Ref=360,100

| Peak #   | RetTime [min] | Type | Width [min] | Area [mAU*s] | Height [mAU] | Area %  |
|----------|---------------|------|-------------|--------------|--------------|---------|
| 1        | 17.072        | HHA  | 0.4778      | 1.16101e4    | 374.43155    | 50.6501 |
| 2        | 22.242        | HBA  | 0.6950      | 1.13120e4    | 250.40831    | 49.3499 |
| Totals : |               |      |             | 2.29221e4    | 624.83986    |         |

**Figure S96. HPLC Chromatography of (*R, E*)-*N*-(2-Methyl-1-phenylbut-2-en-1-yl)-9*H*-fluoren-9-imine (3ad).**

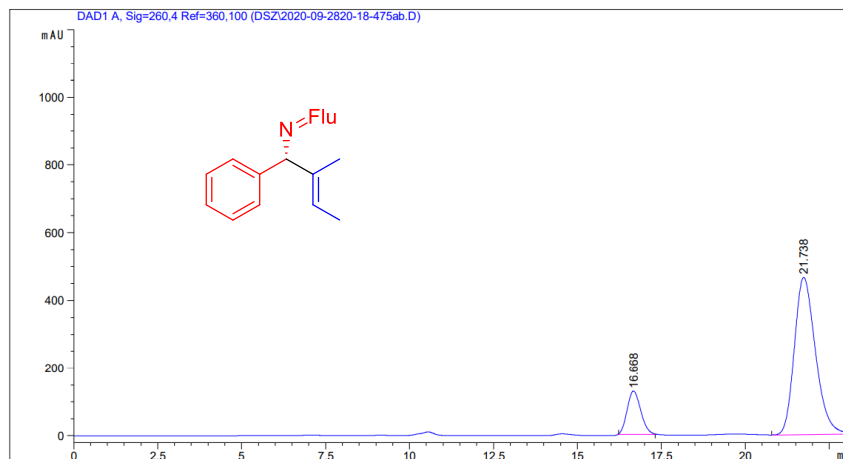

Signal 1: DAD1 A, Sig=260,4 Ref=360,100

| Peak #   | RetTime [min] | Type | Width [min] | Area [mAU*s] | Height [mAU] | Area %  |
|----------|---------------|------|-------------|--------------|--------------|---------|
| 1        | 16.668        | HHA  | 0.4396      | 3588.31348   | 127.79852    | 15.0002 |
| 2        | 21.738        | BHA  | 0.6790      | 2.03335e4    | 464.22116    | 84.9998 |
| Totals : |               |      |             | 2.39218e4    | 592.01968    |         |



**Figure S99. HPLC Chromatography of the Racemic 2-(((9H-Fluoren-9-ylidene)amino)(phenyl) methyl)-N-benzyl-N-methylprop-2-en-1-amine (3ae).**

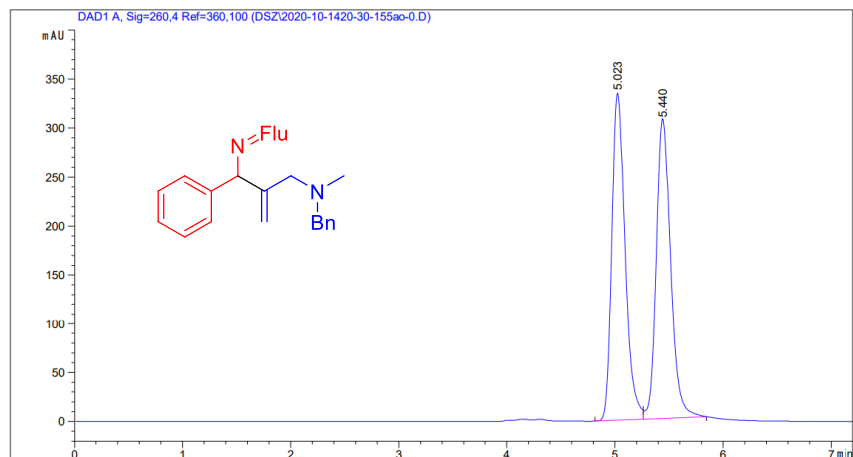

Signal 1: DAD1 A, Sig=260,4 Ref=360,100

| Peak # | RetTime [min] | Type | Width [min] | Area [mAU*s] | Height [mAU] | Area %  |
|--------|---------------|------|-------------|--------------|--------------|---------|
| 1      | 5.023         | RV   | 0.1357      | 2855.59351   | 334.28024    | 50.2406 |
| 2      | 5.440         | VBA  | 0.1484      | 2028.24438   | 304.35300    | 49.7594 |

Totals : 5683.83789 638.63324

**Figure S100. HPLC Chromatography of (S)-2-(((9H-Fluoren-9-ylidene)amino)(phenyl) methyl)-N-benzyl-N-methylprop-2-en-1-amine (3ae).**

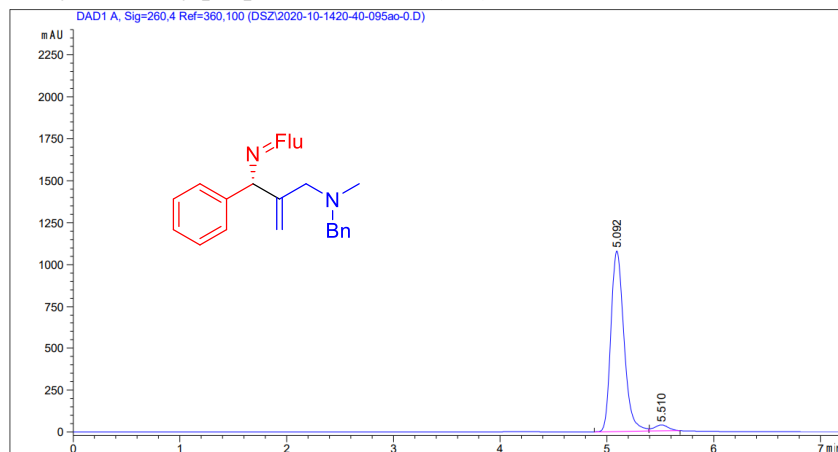

Signal 1: DAD1 A, Sig=260,4 Ref=360,100

| Peak # | RetTime [min] | Type | Width [min] | Area [mAU*s] | Height [mAU] | Area %  |
|--------|---------------|------|-------------|--------------|--------------|---------|
| 1      | 5.092         | BF   | 0.1325      | 9115.09961   | 1079.16333   | 96.4816 |
| 2      | 5.510         | VBA  | 0.1413      | 332.39771    | 36.14714     | 3.5184  |

Totals : 9447.49731 1115.31047



**Figure S101.  $^1\text{H}$  NMR spectra (400 MHz, Chloroform-*d*) of (*S*)-*N*-(2-(Morpholinomethyl)-1-phenylallyl)-9*H*-fluoren-9-imine (3af).**

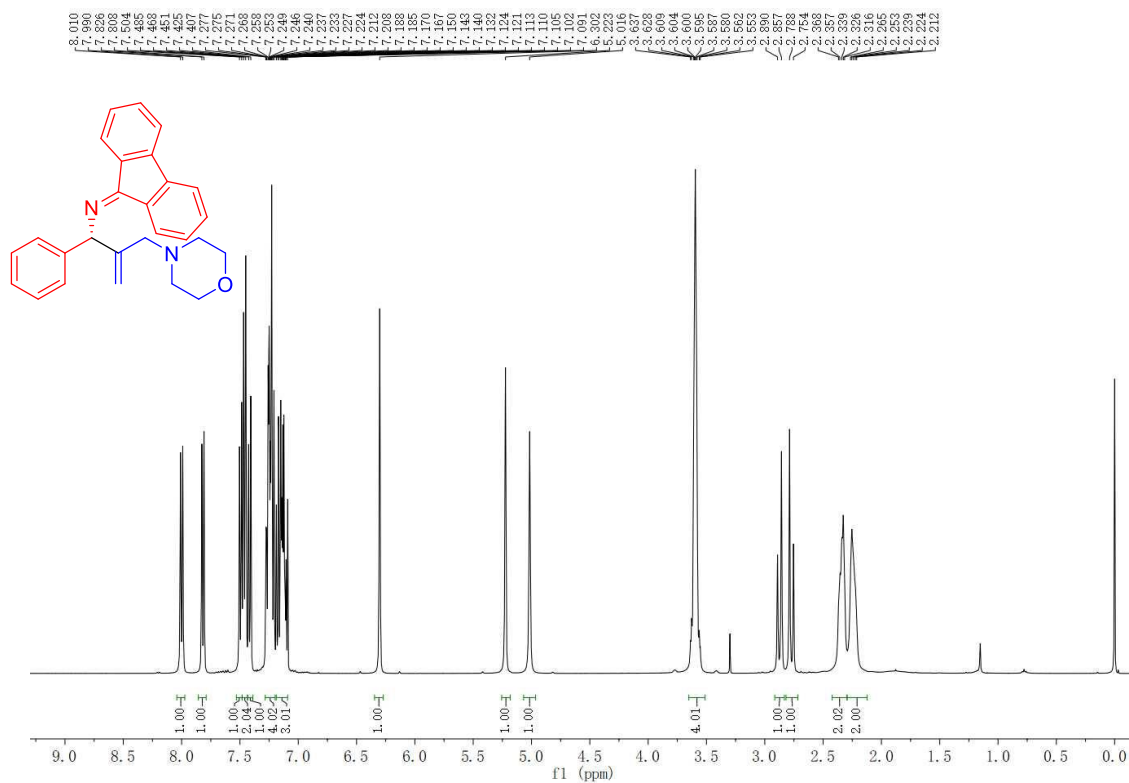

**Figure S102.  $^{13}\text{C}\{^1\text{H}\}$  NMR spectra (100 MHz, Chloroform-*d*) of (*S*)-*N*-(2-(Morpholinomethyl)-1-phenylallyl)-9*H*-fluoren-9-imine (3af).**

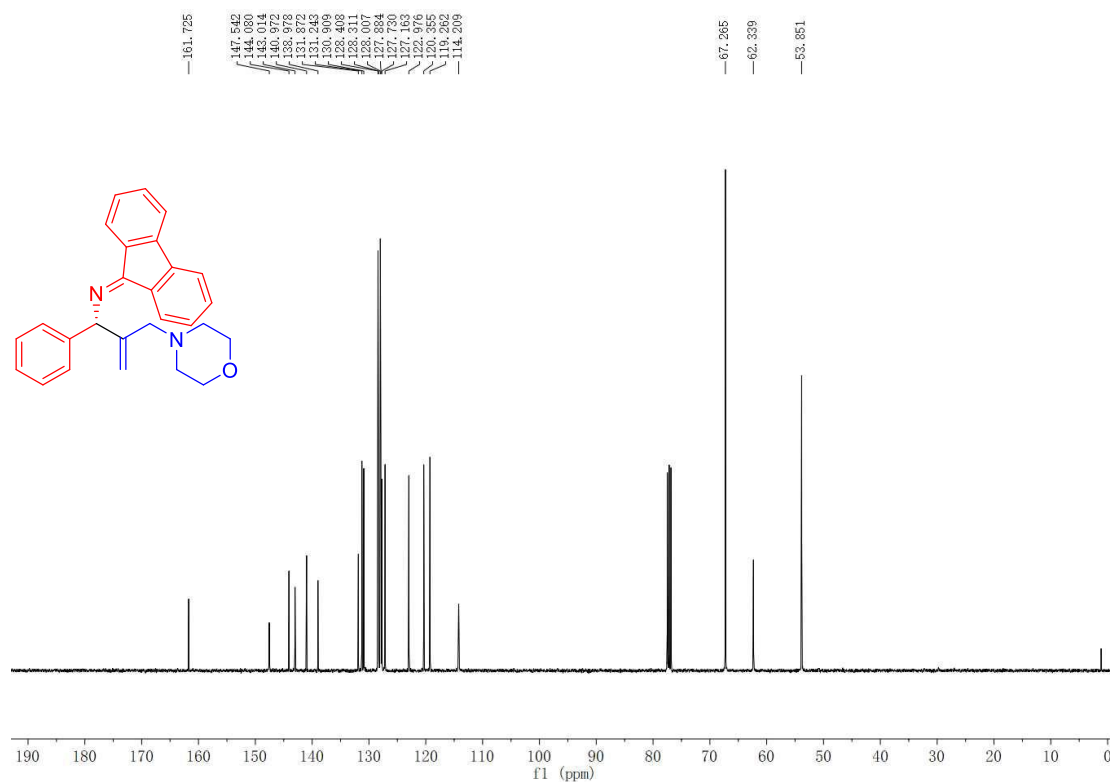

**Figure S103. HPLC Chromatography of the Racemic *N*-(2-(Morpholinomethyl)-1-phenylallyl)-9*H*-fluoren-9-imine (3af).**

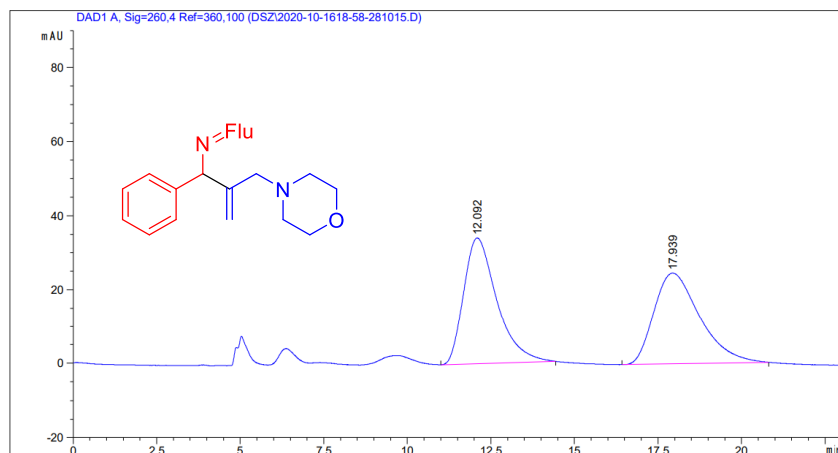

Signal 1: DAD1 A, Sig=260,4 Ref=360,100

| Peak # | RetTime [min] | Type | Width [min] | Area [mAU*s] | Height [mAU] | Area %  |
|--------|---------------|------|-------------|--------------|--------------|---------|
| 1      | 12.092        | BBA  | 1.0482      | 2362.90967   | 34.11057     | 50.0985 |
| 2      | 17.939        | BBA  | 1.4555      | 2353.62109   | 24.70341     | 49.9015 |

Totals : 4716.53076 58.81398

**Figure S104. HPLC Chromatography of (*S*)-*N*-(2-(Morpholinomethyl)-1-phenylallyl)-9*H*-fluoren-9-imine (3af).**

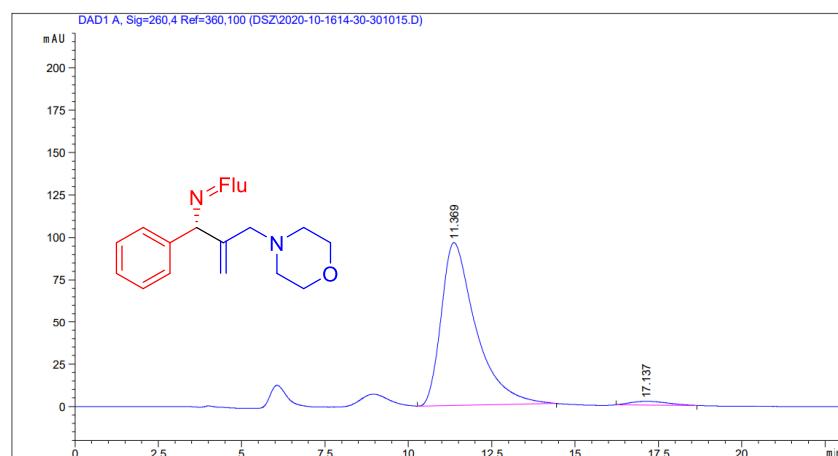

Signal 1: DAD1 A, Sig=260,4 Ref=360,100

| Peak # | RetTime [min] | Type | Width [min] | Area [mAU*s] | Height [mAU] | Area %  |
|--------|---------------|------|-------------|--------------|--------------|---------|
| 1      | 11.369        | BBA  | 1.0575      | 6949.00098   | 96.34267     | 97.5840 |
| 2      | 17.137        | HHA  | 1.2087      | 172.04750    | 2.23856      | 2.4160  |

Totals : 7121.04848 98.58123

Figure S105.  $^1\text{H}$  NMR spectra (400 MHz, Chloroform- $d$ ) of *tert*-Butyl (*S*)-(1-phenyl-2-(pyrrolidin-1-ylmethyl)allyl)carbamate (**3ag**).

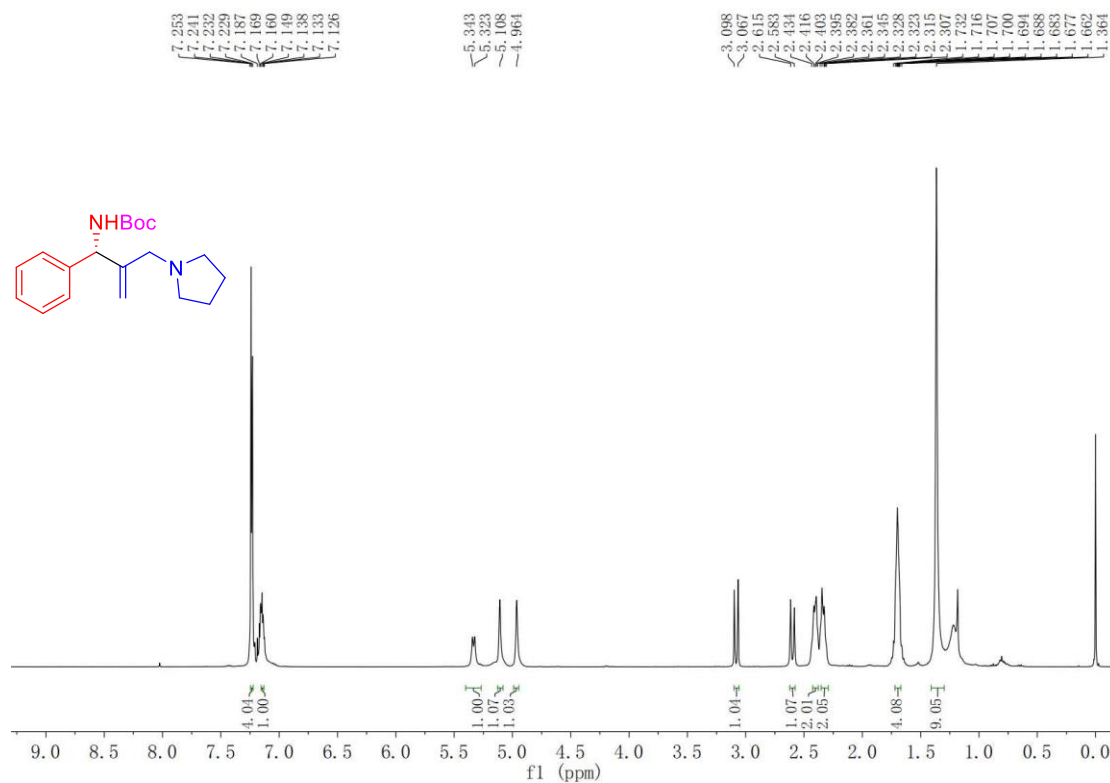

Figure S106.  $^{13}\text{C}\{^1\text{H}\}$  NMR spectra (100 MHz, Chloroform- $d$ ) of *tert*-Butyl (*S*)-(1-phenyl-2-(pyrrolidin-1-ylmethyl)allyl)carbamate (**3ag**).

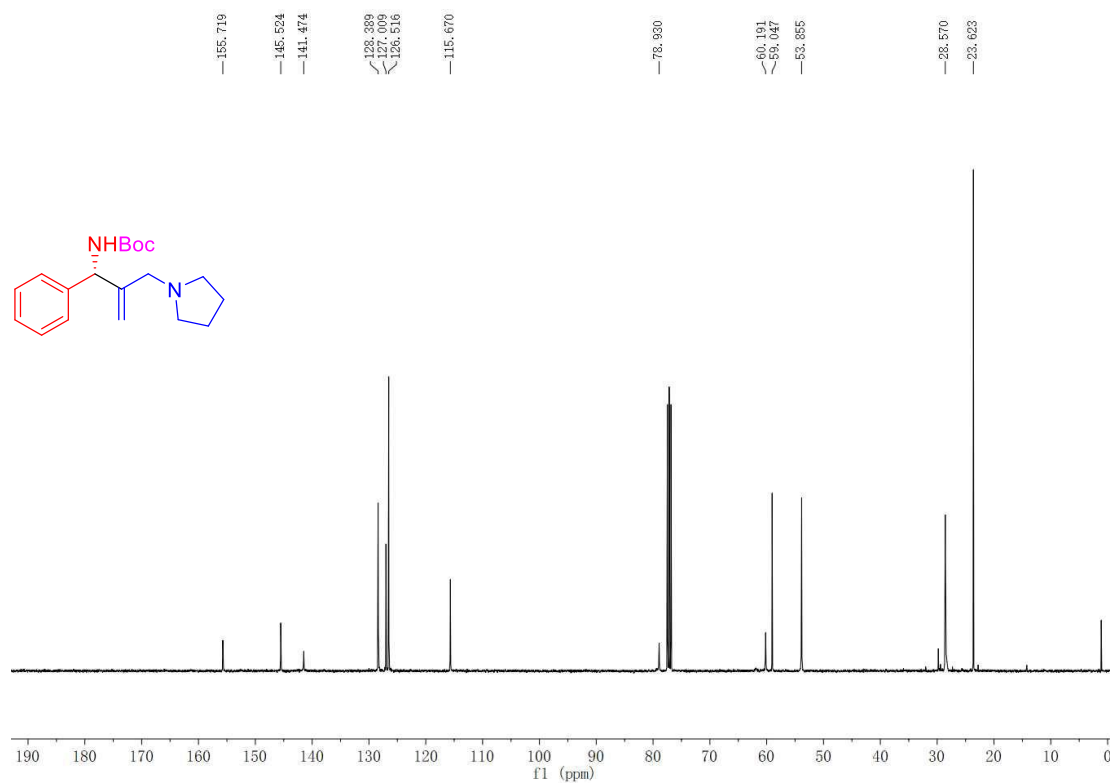

**Figure S107. HPLC Chromatography of the Racemic *N*-(1-Phenyl-2-(pyrrolidin-1-ylmethyl)allyl)-9*H*-fluoren-9-imine (3ag).**

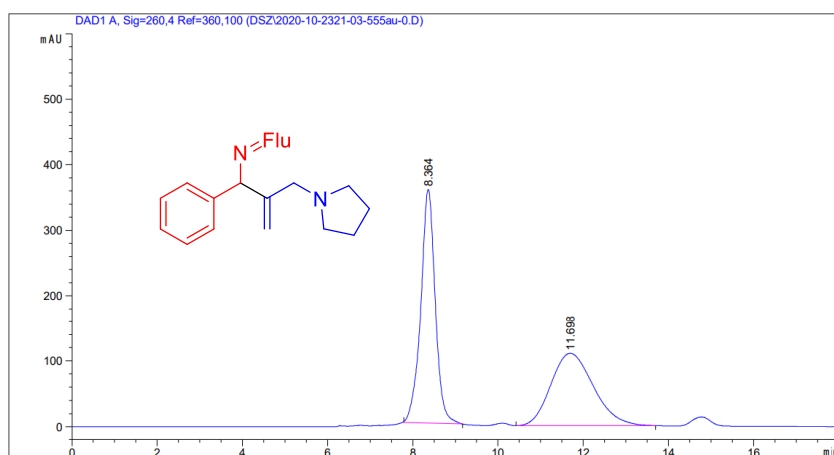

Signal 1: DAD1 A, Sig=260,4 Ref=360,100

| Peak # | RetTime [min] | Type | Width [min] | Area [mAU*s] | Height [mAU] | Area %  |
|--------|---------------|------|-------------|--------------|--------------|---------|
| 1      | 8.364         | HHA  | 0.3550      | 8414.98145   | 357.00095    | 52.4692 |
| 2      | 11.698        | HHA  | 1.0862      | 7622.95947   | 109.77183    | 47.5308 |

Totals : 1.60379e4 466.77277

**Figure S108. HPLC Chromatography of (*S*)-*N*-(1-Phenyl-2-(pyrrolidin-1-ylmethyl)allyl)-9*H*-fluoren-9-imine (3ag).**

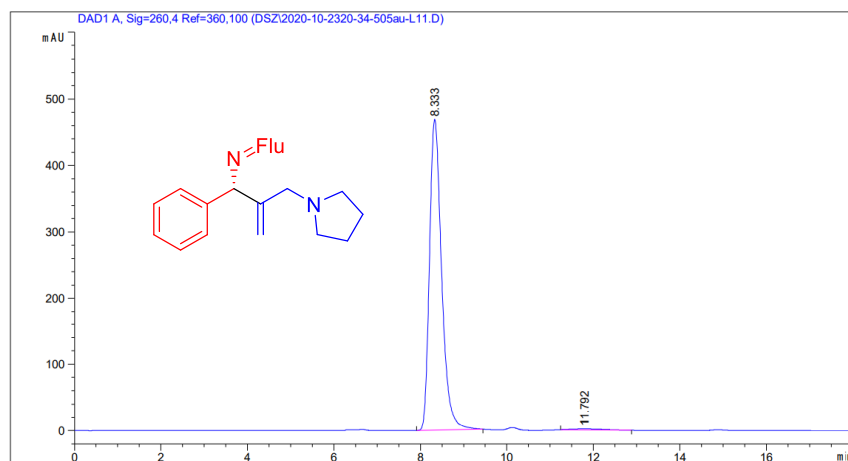

Signal 1: DAD1 A, Sig=260,4 Ref=360,100

| Peak # | RetTime [min] | Type | Width [min] | Area [mAU*s] | Height [mAU] | Area %  |
|--------|---------------|------|-------------|--------------|--------------|---------|
| 1      | 8.333         | BBA  | 0.2986      | 9098.54590   | 468.36200    | 98.9657 |
| 2      | 11.792        | HHA  | 0.8871      | 95.09370     | 1.71457      | 1.0343  |

Totals : 9193.63960 470.07657

**Figure S109.**  $^1\text{H}$  NMR spectra (400 MHz, Chloroform-*d*) of *tert*-Butyl (*S*)-(1-phenyl-2-(piperidin-1-ylmethyl)allyl)carbamate (**3ah**).

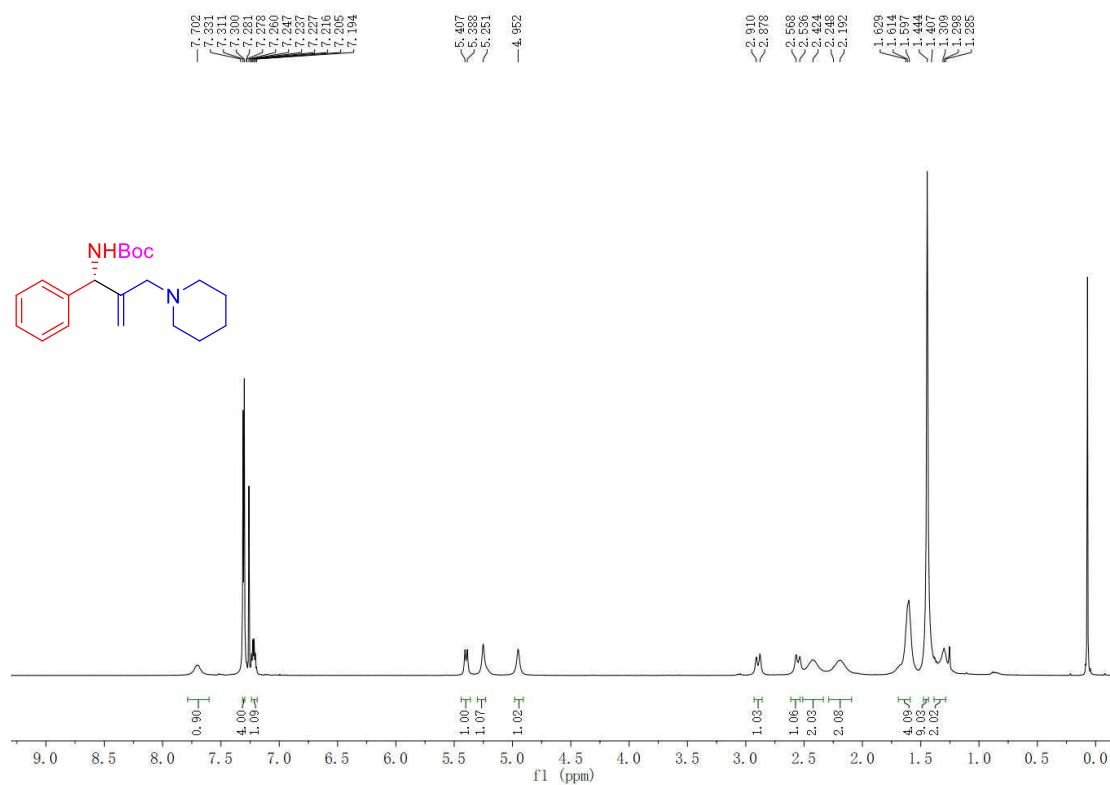

**Figure S110.**  $^{13}\text{C}\{^1\text{H}\}$  NMR spectra (100 MHz, Chloroform-*d*) of *tert*-Butyl (*S*)-(1-phenyl-2-(piperidin-1-ylmethyl)allyl)carbamate (**3ah**).

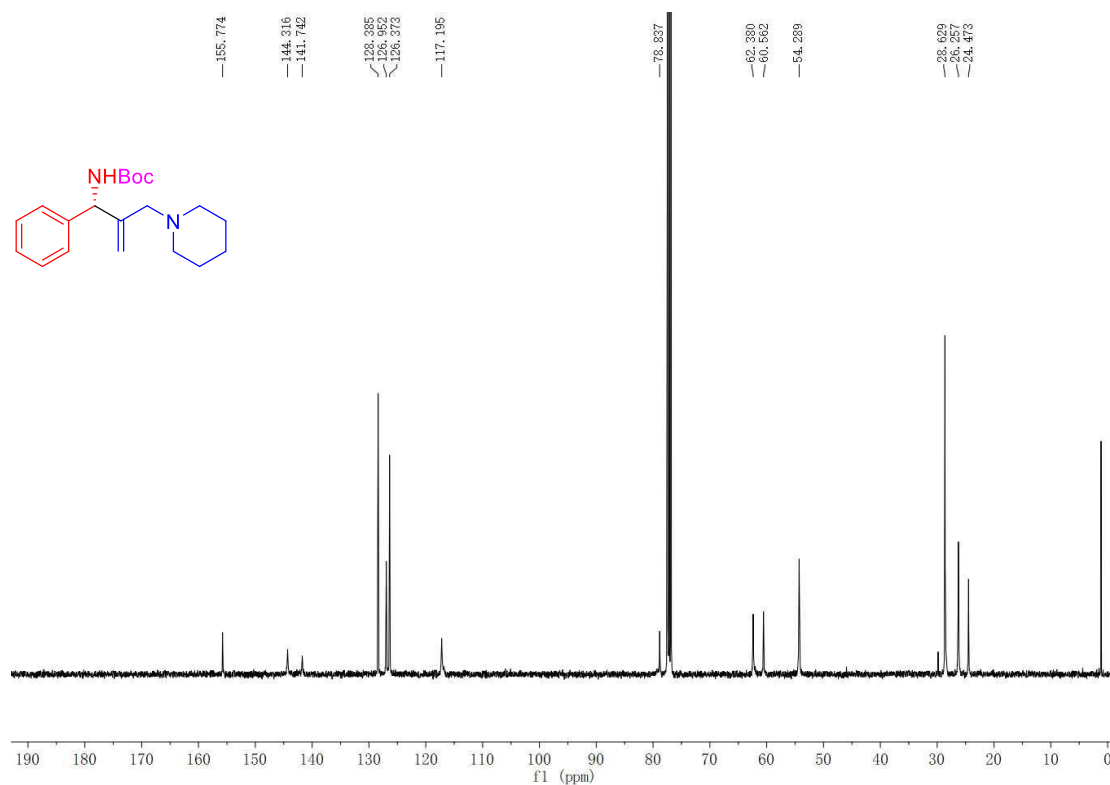

**Figure S111. HPLC Chromatography of the Racemic *N*-(1-Phenyl-2-(piperidin-1-ylmethyl)allyl)-9*H*-fluoren-9-imine (3ah).**

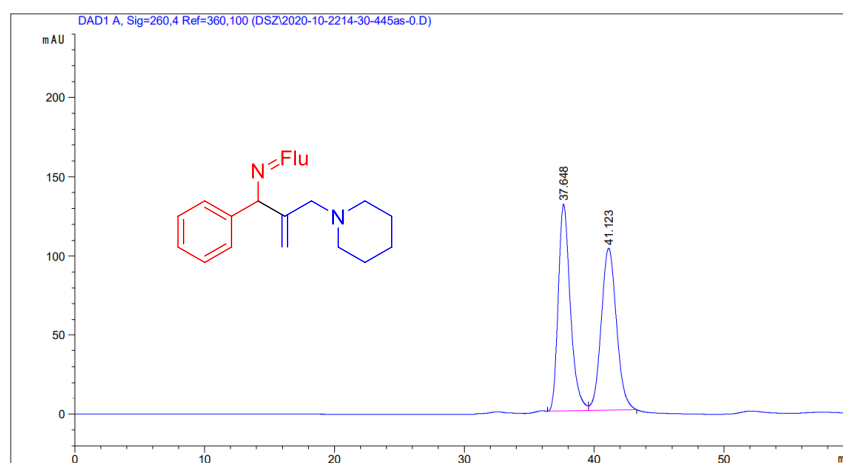

Signal 1: DAD1 A, Sig=260,4 Ref=360,100

| Peak # | RetTime [min] | Type | Width [min] | Area [mAU*s] | Height [mAU] | Area %  |
|--------|---------------|------|-------------|--------------|--------------|---------|
| 1      | 37.648        | BV   | 0.9919      | 8472.58594   | 130.76408    | 50.2899 |
| 2      | 41.123        | VBA  | 1.2484      | 8374.89648   | 102.58543    | 49.7101 |

Totals : 1.68475e4 233.34951

**Figure S112. HPLC Chromatography of (*S*)-*N*-(1-Phenyl-2-(piperidin-1-ylmethyl)allyl)-9*H*-fluoren-9-imine (3ah).**

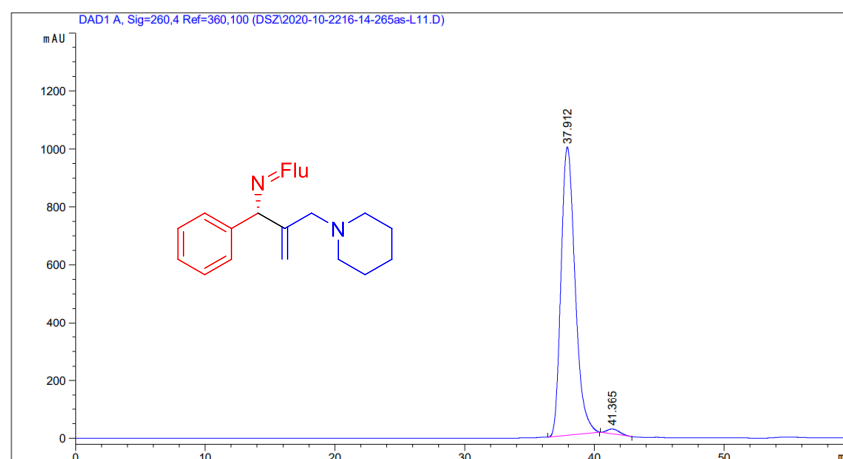

Signal 1: DAD1 A, Sig=260,4 Ref=360,100

| Peak # | RetTime [min] | Type | Width [min] | Area [mAU*s] | Height [mAU] | Area %  |
|--------|---------------|------|-------------|--------------|--------------|---------|
| 1      | 37.912        | BBA  | 1.1713      | 7.51240e4    | 996.71564    | 98.5255 |
| 2      | 41.365        | BBA  | 1.0771      | 1124.25903   | 16.70677     | 1.4745  |

Totals : 7.62482e4 1013.42241



**Figure S115. HPLC Chromatography of the Racemic *N*-(2-((3,4-Dihydroisoquinolin-2(1*H*)-yl)methyl)-1-phenylallyl)-9*H*-fluoren-9-imine (3ai).**

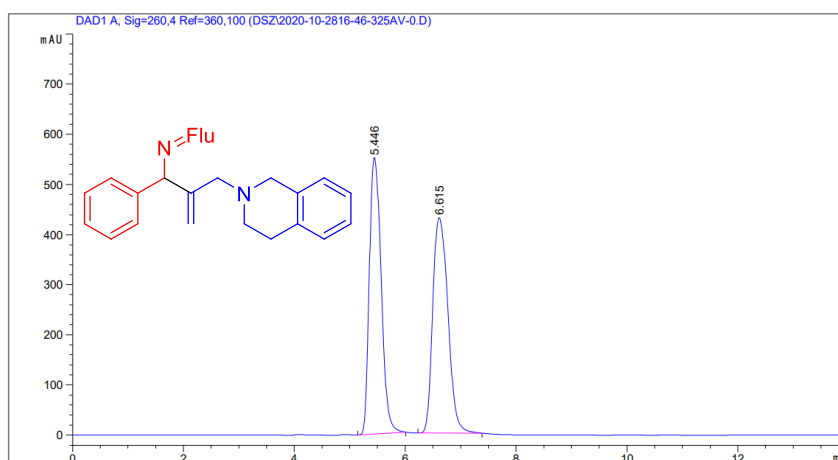

Signal 1: DAD1 A, Sig=260,4 Ref=360,100

| Peak # | RetTime [min] | Type | Width [min] | Area [mAU*s] | Height [mAU] | Area %  |
|--------|---------------|------|-------------|--------------|--------------|---------|
| 1      | 5.446         | BBA  | 0.2371      | 8165.89160   | 550.32367    | 49.9998 |
| 2      | 6.615         | BBA  | 0.3096      | 8165.94385   | 430.00793    | 50.0002 |

Totals : 1.63318e4 980.33160

**Figure S116. HPLC Chromatography of (*S*)-*N*-(2-((3,4-Dihydroisoquinolin-2(1*H*)-yl)methyl)-1-phenylallyl)-9*H*-fluoren-9-imine (3ai).**

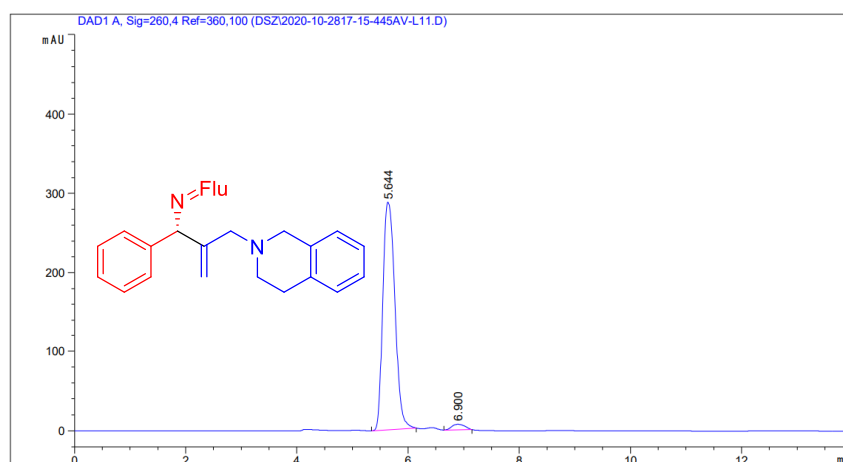

Signal 1: DAD1 A, Sig=260,4 Ref=360,100

| Peak # | RetTime [min] | Type | Width [min] | Area [mAU*s] | Height [mAU] | Area %  |
|--------|---------------|------|-------------|--------------|--------------|---------|
| 1      | 5.644         | BBA  | 0.2439      | 4336.20996   | 287.59045    | 97.4556 |
| 2      | 6.900         | BBA  | 0.2696      | 113.21263    | 6.96725      | 2.5444  |

Totals : 4449.42259 294.55770



**Figure S117.**  $^1\text{H}$  NMR spectra (400 MHz, Chloroform-*d*) of (*S*)-2-((9*H*-Fluoren-9-ylidene)amino)(2,3-dihydrobenzofuran-5-yl)methyl)-*N*-benzyl-*N*-methylprop-2-en-1-amine (3je).

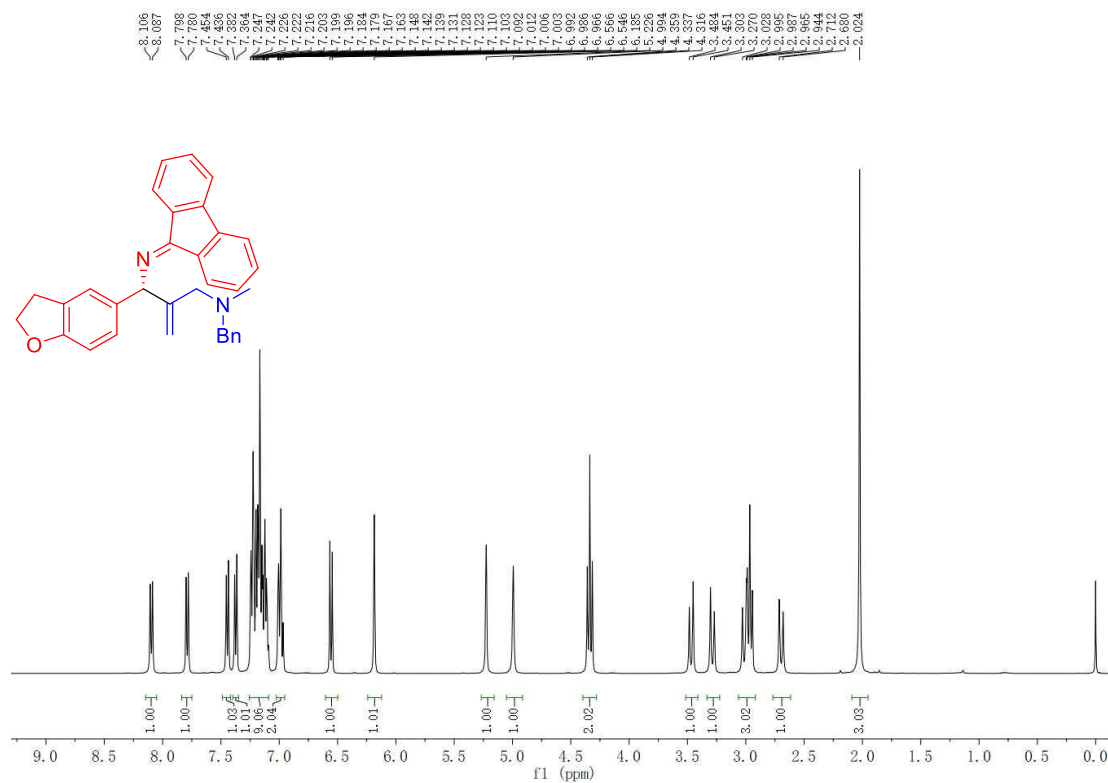

**Figure S118.**  $^{13}\text{C}\{^1\text{H}\}$  NMR spectra (100 MHz, Chloroform-*d*) of (*S*)-2-((9*H*-Fluoren-9-ylidene)amino)(2,3-dihydrobenzofuran-5-yl)methyl)-*N*-benzyl-*N*-methylprop-2-en-1-amine (3je).

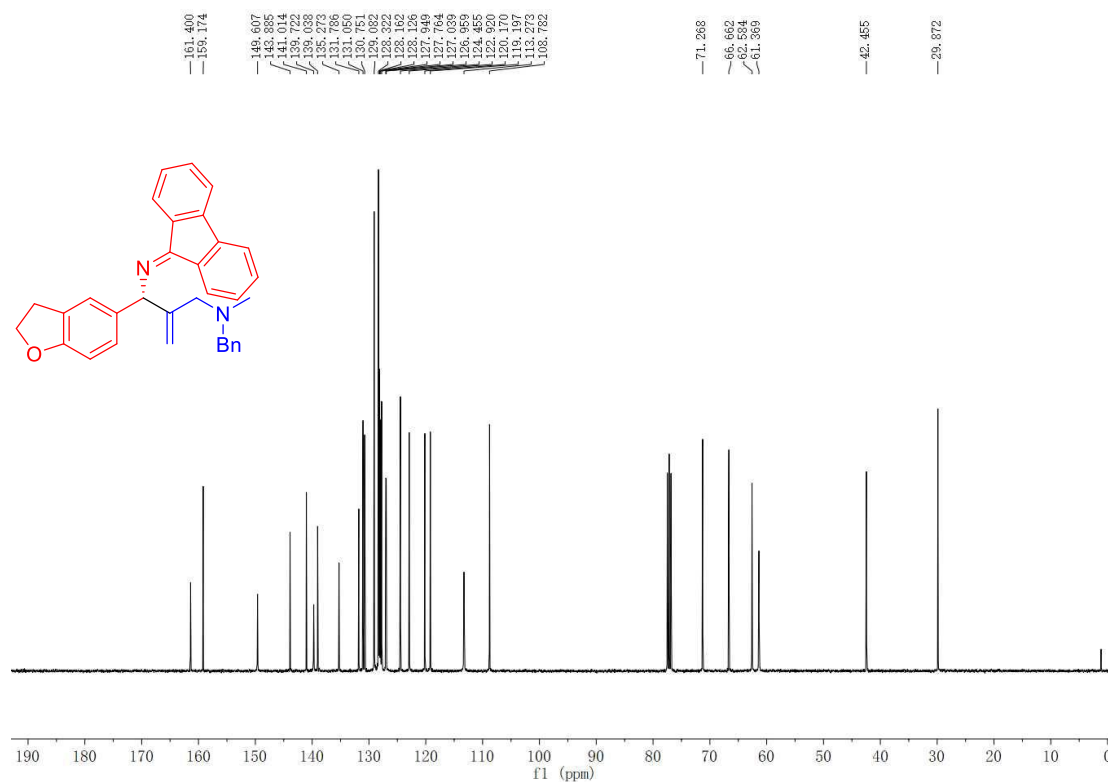

**Figure S119. HPLC Chromatography of the Racemic 2-(((9*H*-Fluoren-9-ylidene)amino)(2,3-dihydrobenzofuran-5-yl)methyl)-*N*-benzyl-*N*-methylprop-2-en-1-amine (3je).**

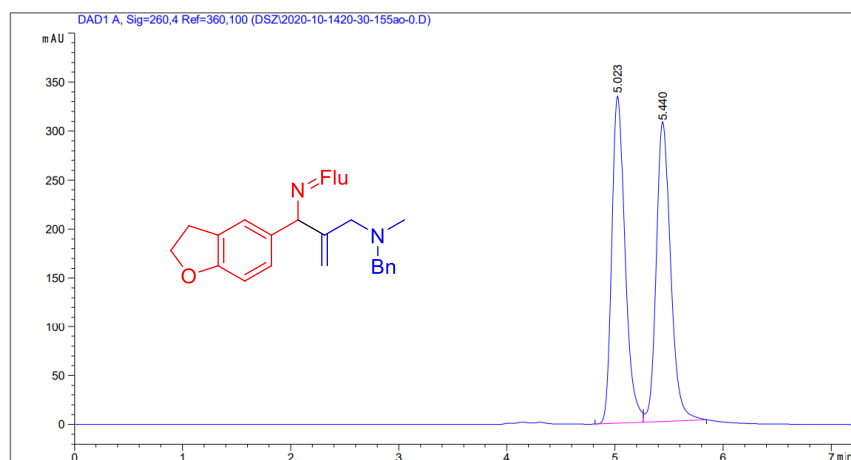

Signal 1: DAD1 A, Sig=260,4 Ref=360,100

| Peak # | RetTime [min] | Type | Width [min] | Area [mAU*s] | Height [mAU] | Area %  |
|--------|---------------|------|-------------|--------------|--------------|---------|
| 1      | 5.023         | BV   | 0.1357      | 2855.59351   | 334.28024    | 50.2406 |
| 2      | 5.440         | VBA  | 0.1484      | 2828.24438   | 304.35300    | 49.7594 |

Totals : 5683.83789 638.63324

**Figure S120. HPLC Chromatography of (*S*)-2-(((9*H*-Fluoren-9-ylidene)amino)(2,3-dihydrobenzofuran-5-yl)methyl)-*N*-benzyl-*N*-methylprop-2-en-1-amine (3je).**

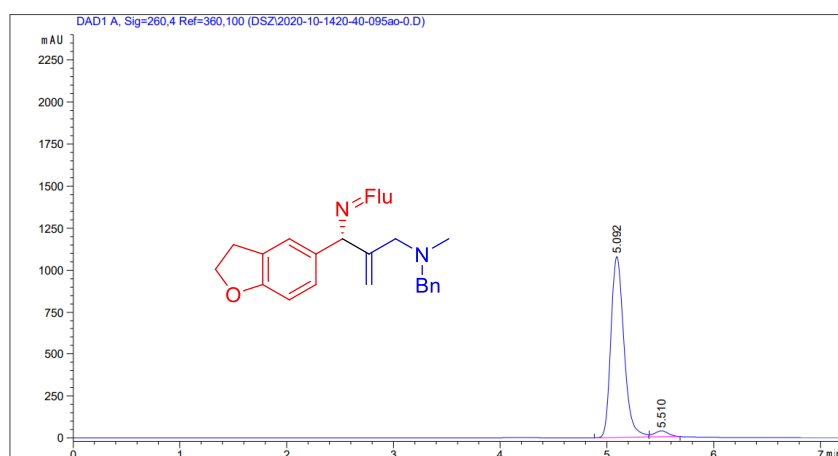

Signal 1: DAD1 A, Sig=260,4 Ref=360,100

| Peak # | RetTime [min] | Type | Width [min] | Area [mAU*s] | Height [mAU] | Area %  |
|--------|---------------|------|-------------|--------------|--------------|---------|
| 1      | 5.092         | BF   | 0.1325      | 9115.09961   | 1079.16333   | 96.4816 |
| 2      | 5.510         | VBA  | 0.1413      | 332.39771    | 36.14714     | 3.5184  |

Totals : 9447.49731 1115.31047

**Figure S121.**  $^1\text{H}$  NMR spectra (400 MHz, Chloroform-*d*) of (*S*)-*N*-(1-(2,3-Dihydrobenzofuran-5-yl)-2-(morpholinomethyl)allyl)-9*H*-fluoren-9-imine (**3jf**).

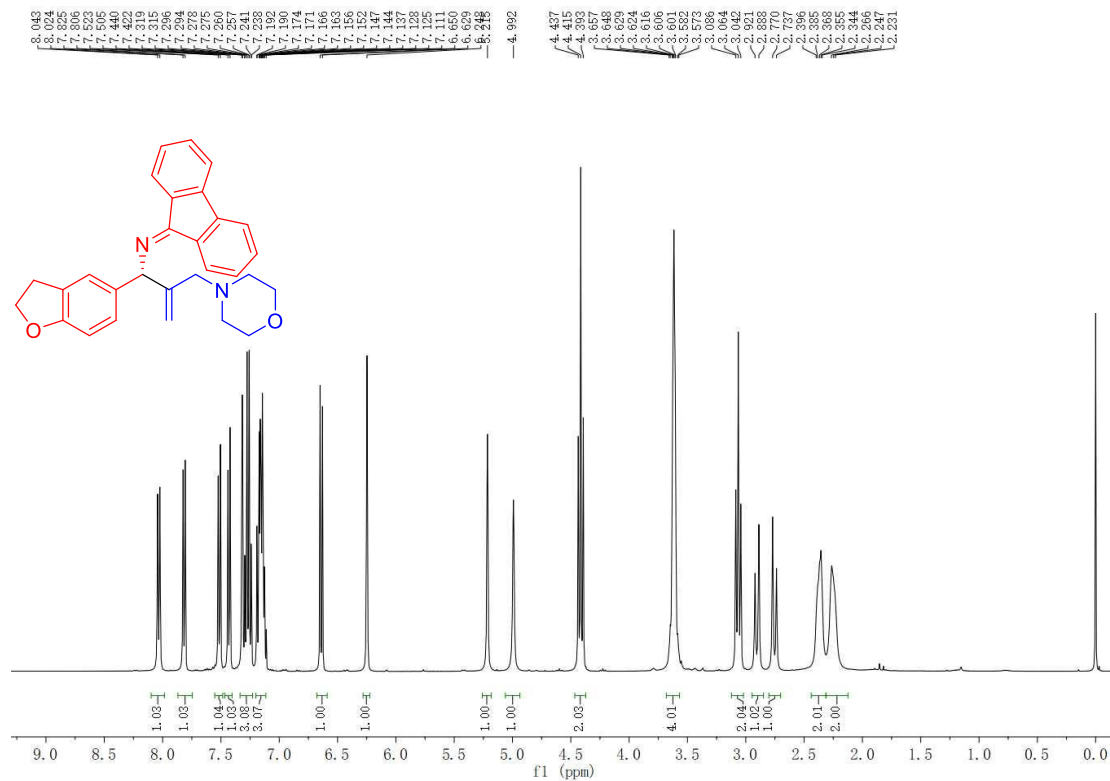

**Figure S122.**  $^{13}\text{C}\{^1\text{H}\}$  NMR spectra (100 MHz, Chloroform-*d*) of (*S*)-*N*-(1-(2,3-Dihydrobenzofuran-5-yl)-2-(morpholinomethyl)allyl)-9*H*-fluoren-9-imine (**3jf**).

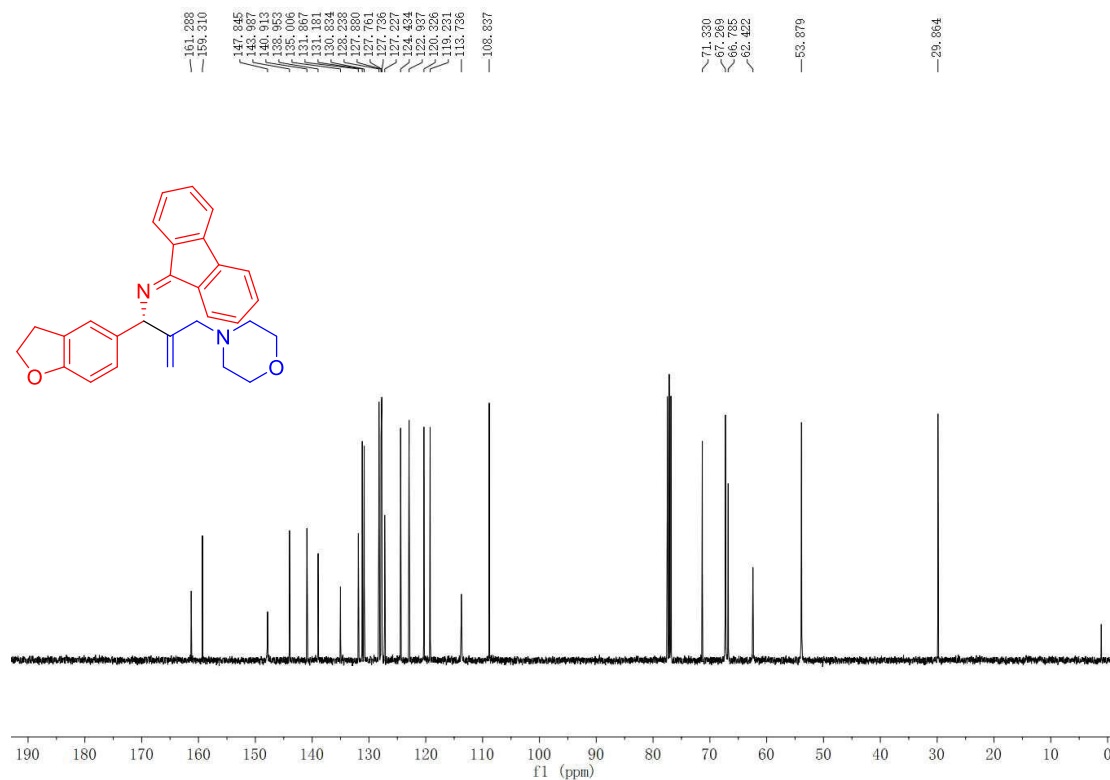

**Figure S123. HPLC Chromatography of the Racemic *N*-(1-(2,3-Dihydrobenzofuran-5-yl)-2-(morpholinomethyl)allyl)-9*H*-fluoren-9-imine (3jf).**

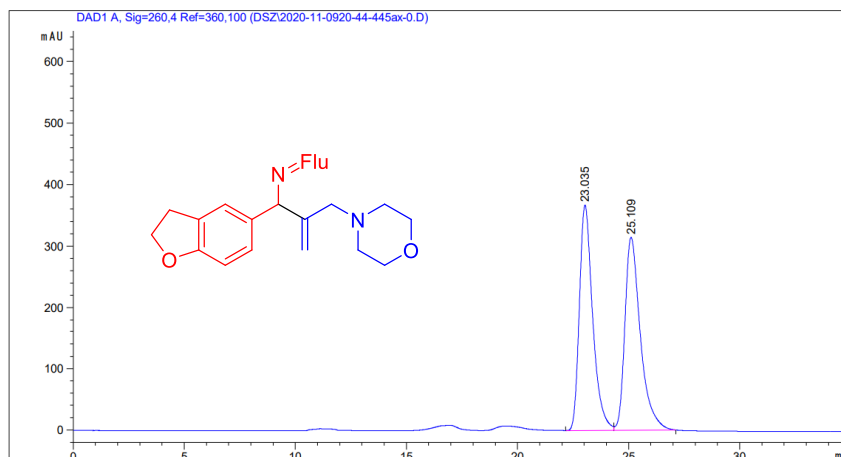

Signal 1: DAD1 A, Sig=260,4 Ref=360,100

| Peak # | RetTime [min] | Type | Width [min] | Area [mAU*s] | Height [mAU] | Area %  |
|--------|---------------|------|-------------|--------------|--------------|---------|
| 1      | 23.035        | BV   | 0.6290      | 1.52687e4    | 367.29022    | 50.0151 |
| 2      | 25.109        | VBA  | 0.7336      | 1.52595e4    | 314.77200    | 49.9849 |

Totals : 3.05282e4 682.06223

**Figure S124. HPLC Chromatography of (*S*)-*N*-(1-(2,3-Dihydrobenzofuran-5-yl)-2-(morpholinomethyl)allyl)-9*H*-fluoren-9-imine (3jf).**

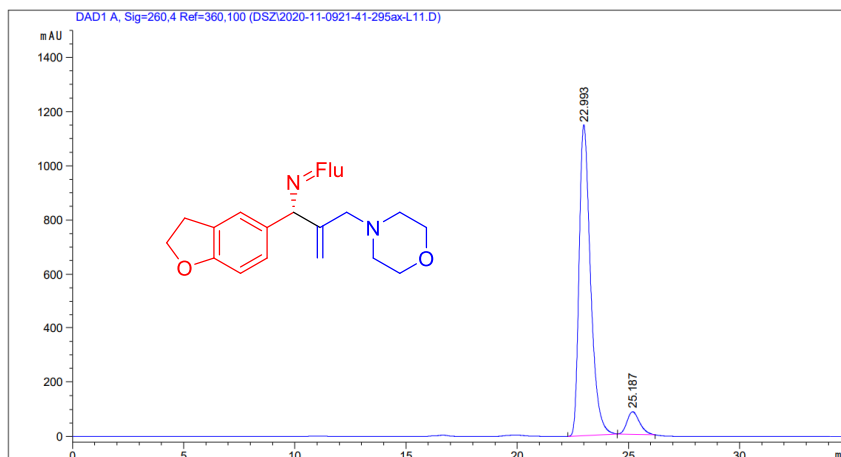

Signal 1: DAD1 A, Sig=260,4 Ref=360,100

| Peak # | RetTime [min] | Type | Width [min] | Area [mAU*s] | Height [mAU] | Area %  |
|--------|---------------|------|-------------|--------------|--------------|---------|
| 1      | 22.993        | BBA  | 0.5511      | 4.08007e4    | 1146.71045   | 92.6228 |
| 2      | 25.187        | BBA  | 0.6095      | 3249.67700   | 82.86861     | 7.3772  |

Totals : 4.40504e4 1229.57906

**Figure S125.**  $^1\text{H}$  NMR spectra (400 MHz, Chloroform-*d*) of (*S*)-*N*-(1-(2,3-Dihydrobenzofuran-5-yl)-2-((3,4-dihydroisoquinolin-2(1*H*)-yl)methyl)allyl)-9*H*-fluoren-9-imine (3ji).

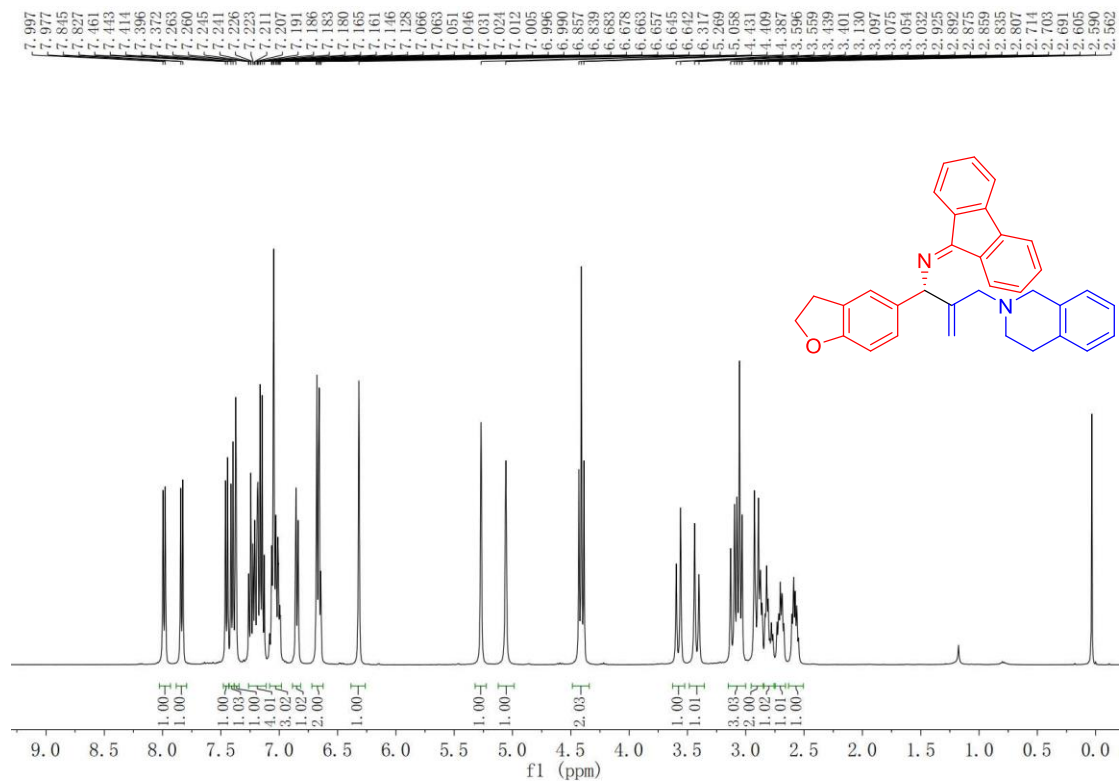

**Figure S126.**  $^{13}\text{C}\{^1\text{H}\}$  NMR spectra (100 MHz, Chloroform-*d*) of (*S*)-*N*-(1-(2,3-Dihydrobenzofuran-5-yl)-2-((3,4-dihydroisoquinolin-2(1*H*)-yl)methyl)allyl)-9*H*-fluoren-9-imine (3ji).

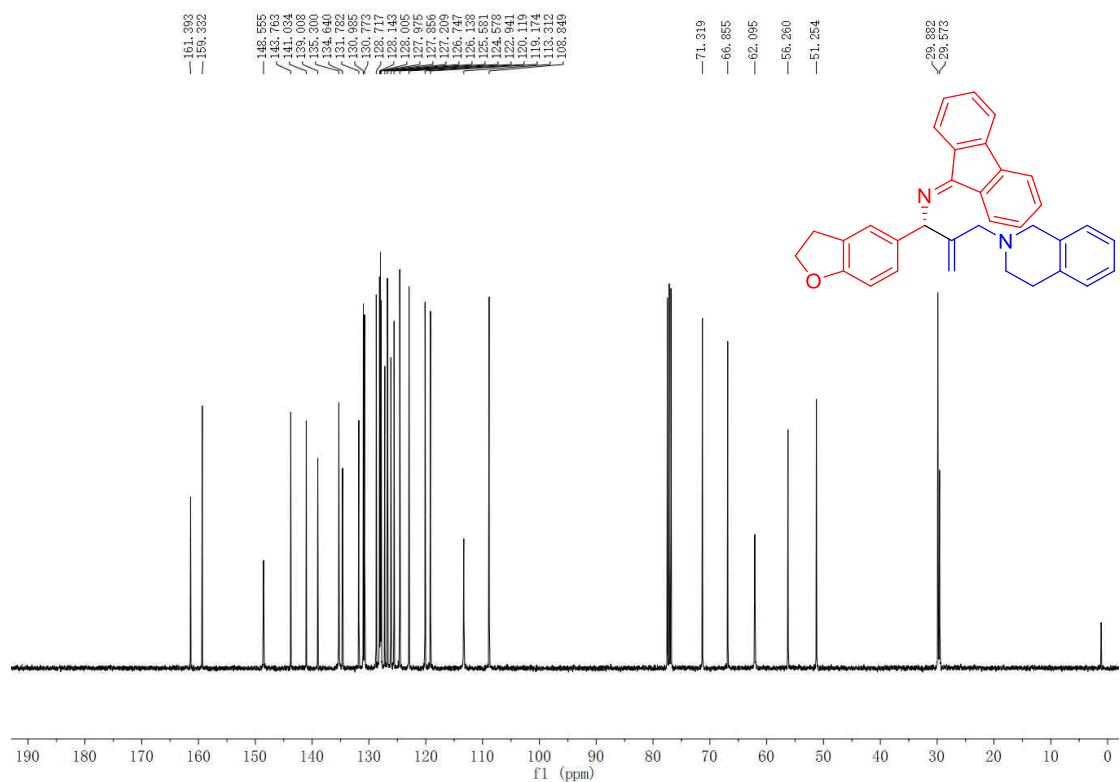

**Figure S127. HPLC Chromatography of the Racemic *N*-(1-(2,3-Dihydrobenzofuran-5-yl)-2-((3,4-dihydroisoquinolin-2(1*H*)-yl)methyl)allyl)-9*H*-fluoren-9-imine (3ji).**

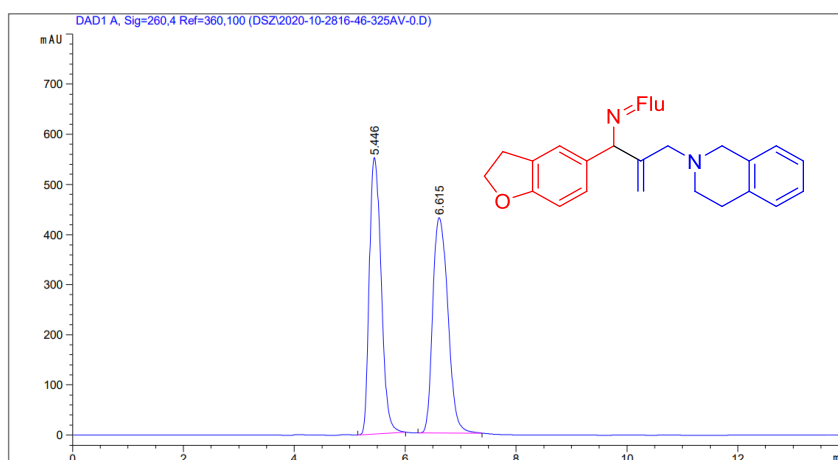

Signal 1: DAD1 A, Sig=260,4 Ref=360,100

| Peak # | RetTime [min] | Type | Width [min] | Area [mAU*s] | Height [mAU] | Area %  |
|--------|---------------|------|-------------|--------------|--------------|---------|
| 1      | 5.446         | BBA  | 0.2371      | 8165.89160   | 550.32367    | 49.9998 |
| 2      | 6.615         | BBA  | 0.3096      | 8165.94385   | 430.00793    | 50.0002 |

Totals : 1.63318e4 980.33160

**Figure S128. HPLC Chromatography of (*S*)-*N*-(1-(2,3-Dihydrobenzofuran-5-yl)-2-((3,4-dihydroisoquinolin-2(1*H*)-yl)methyl)allyl)-9*H*-fluoren-9-imine (3ji).**

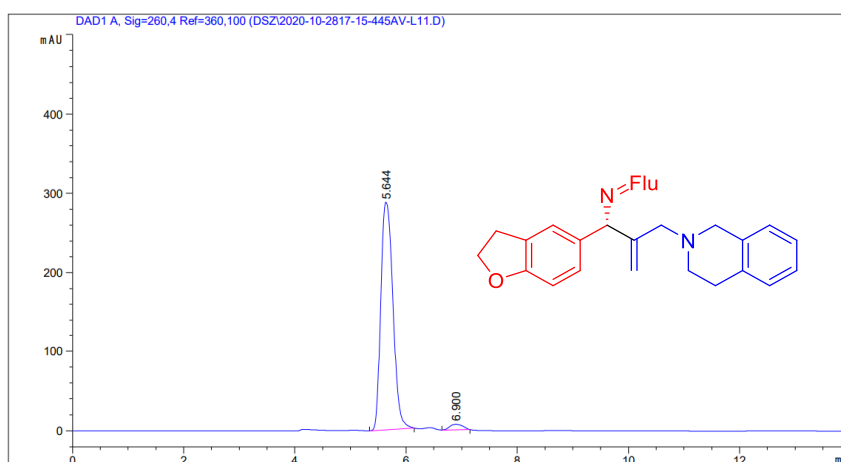

Signal 1: DAD1 A, Sig=260,4 Ref=360,100

| Peak # | RetTime [min] | Type | Width [min] | Area [mAU*s] | Height [mAU] | Area %  |
|--------|---------------|------|-------------|--------------|--------------|---------|
| 1      | 5.644         | BBA  | 0.2439      | 4336.20996   | 287.59045    | 97.4556 |
| 2      | 6.900         | BBA  | 0.2696      | 113.21263    | 6.96725      | 2.5444  |

Totals : 4449.42259 294.55770

**Figure S129.**  $^1\text{H}$  NMR spectra (400 MHz, Chloroform-*d*) of (*R*)-4-Methyl-*N*-(2-methyl-1-(naphthalen-1-yl)allyl)benzenesulfonamide (4ka).

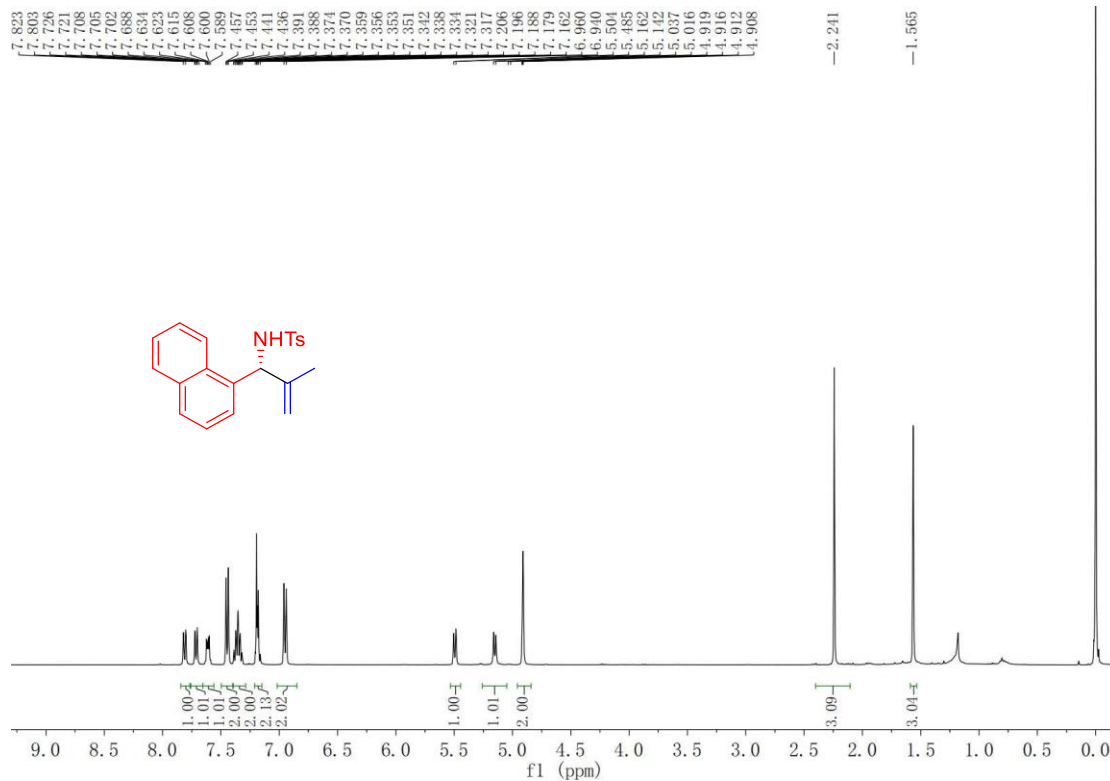

**Figure S130.**  $^{13}\text{C}\{^1\text{H}\}$  NMR spectra (100 MHz, Chloroform-*d*) of (*R*)-4-Methyl-*N*-(2-methyl-1-(naphthalen-1-yl)allyl)benzenesulfonamide (4ka).

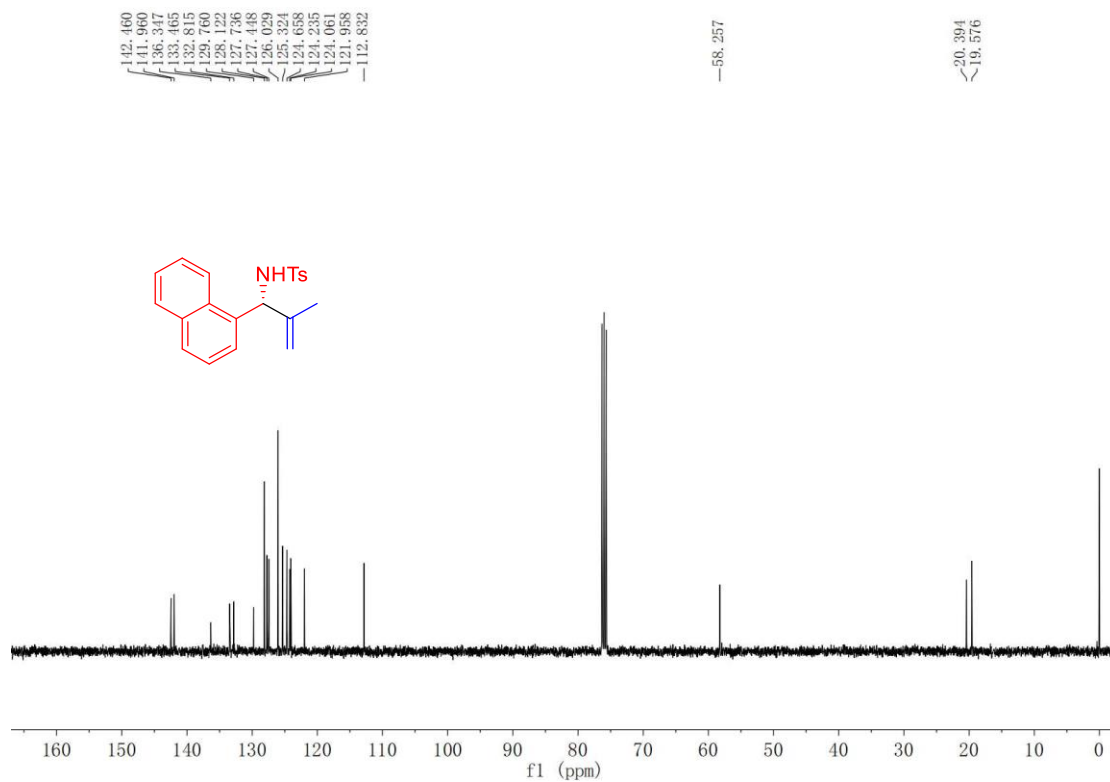

**Figure S131.**  $^1\text{H}$  NMR spectra (400 MHz, Chloroform-*d*) of (*R*)-*N*-(1-(2,3-Dihydrobenzofuran-5-yl)-2-methylallyl)-4-methylbenzenesulfonamide (4la).

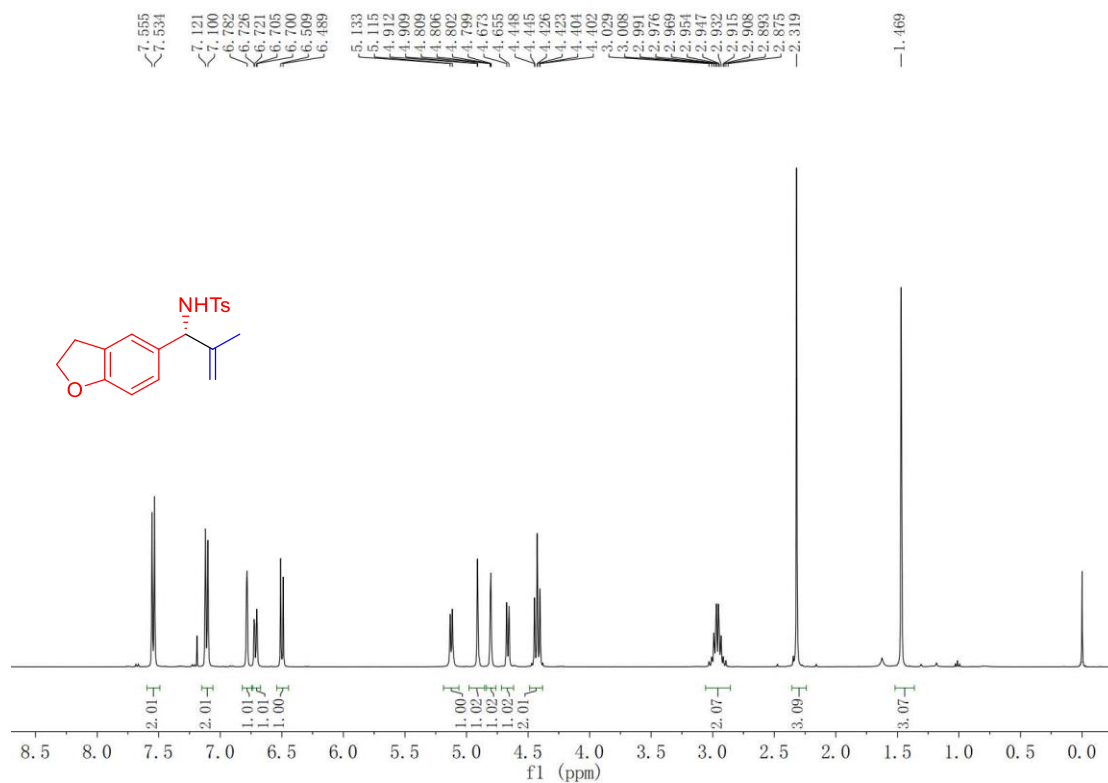

**Figure S132.**  $^{13}\text{C}\{^1\text{H}\}$  NMR spectra (100 MHz, Chloroform-*d*) of (*R*)-*N*-(1-(2,3-Dihydrobenzofuran-5-yl)-2-methylallyl)-4-methylbenzenesulfonamide (4la).

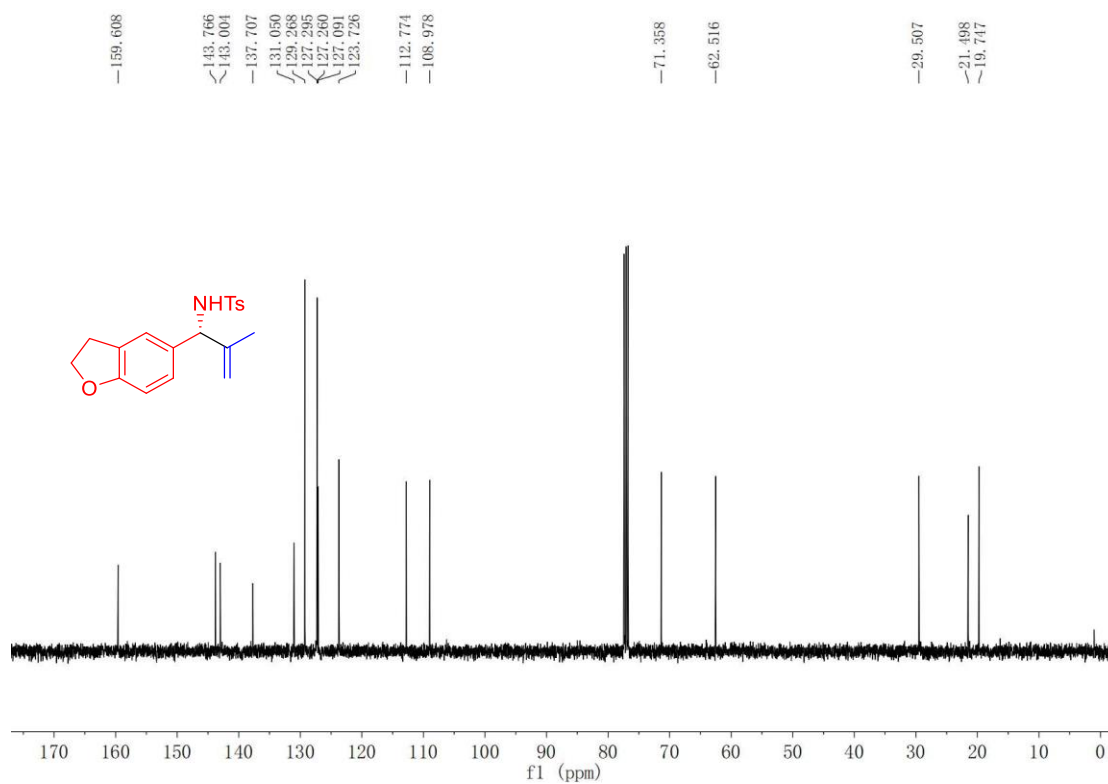



**Figure S133.  $^1\text{H}$  NMR spectra (400 MHz, Chloroform- $d$ ) of (*R*)-*N*-((2,3-Dihydrobenzofuran-5-yl)(1-methylcyclopropyl)methyl)-4-methylbenzenesulfonamide (51a).**

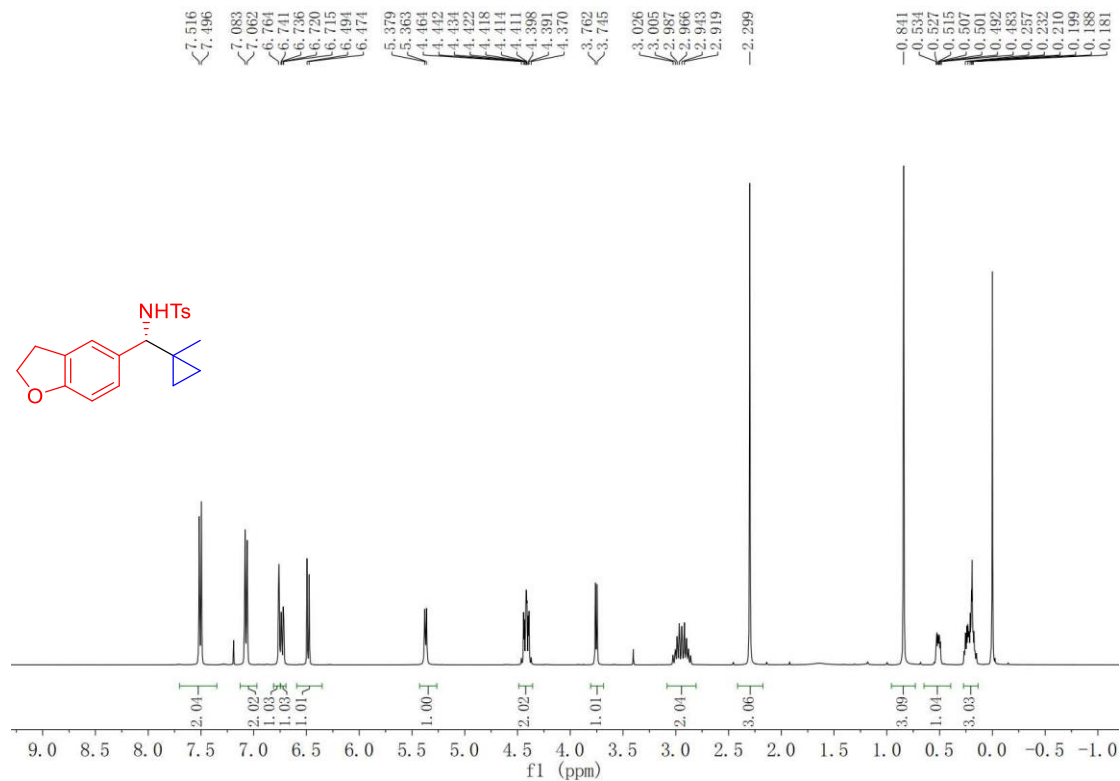

**Figure S134.  $^{13}\text{C}\{^1\text{H}\}$  NMR spectra (100 MHz, Chloroform- $d$ ) of (*R*)-*N*-((2,3-Dihydrobenzofuran-5-yl)(1-methylcyclopropyl)methyl)-4-methylbenzenesulfonamide (51a).**

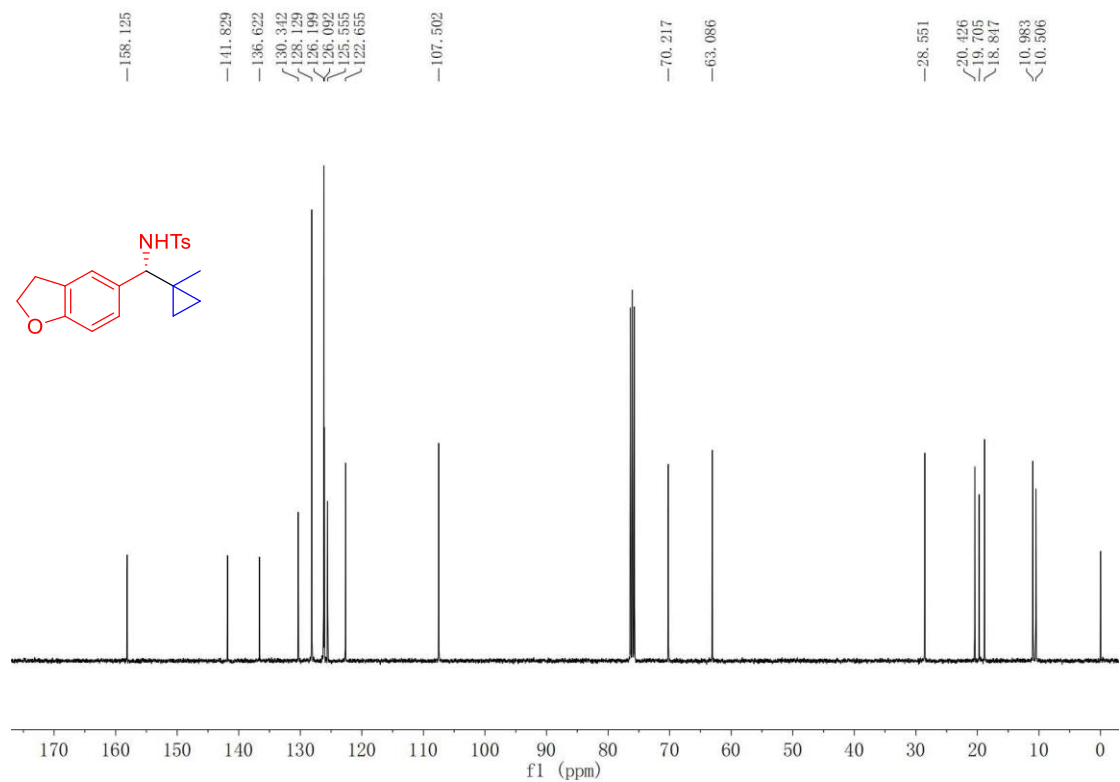

**Figure S135. HPLC Chromatography of (R)-N-((2,3-Dihydrobenzofuran-5-yl)(1-methylcyclopropyl)methyl)-4-methylbenzenesulfonamide (51a).**

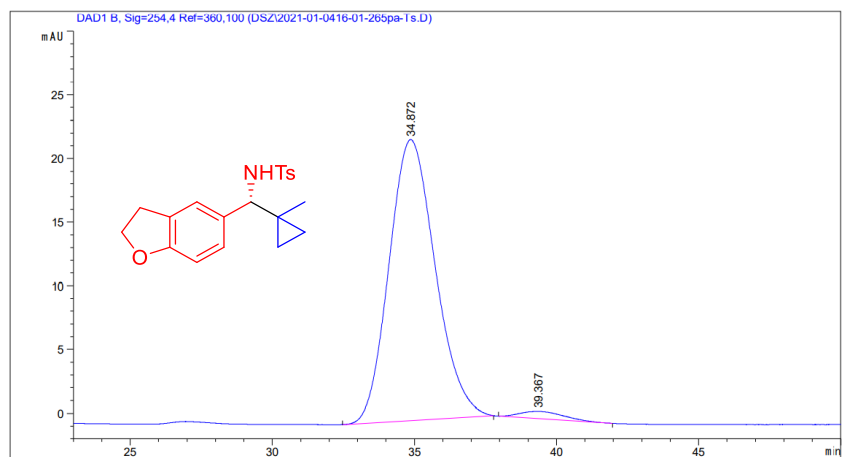

Signal 1: DAD1 B, Sig=254,4 Ref=360,100

| Peak #   | RetTime [min] | Type | Width [min] | Area [mAU*s] | Height [mAU] | Area %  |
|----------|---------------|------|-------------|--------------|--------------|---------|
| 1        | 34.872        | BBA  | 1.7222      | 2484.42090   | 22.05529     | 97.5621 |
| 2        | 39.367        | BB   | 1.2595      | 62.08019     | 5.79637e-1   | 2.4379  |
| Totals : |               |      |             | 2546.50109   | 22.63492     |         |

Figure S136. <sup>1</sup>H NMR spectra (400 MHz, Chloroform-*d*) of (*R*)-1-(2,3-Dihydrobenzofuran-5-yl)-2-methylpropan-1-amine (6la).

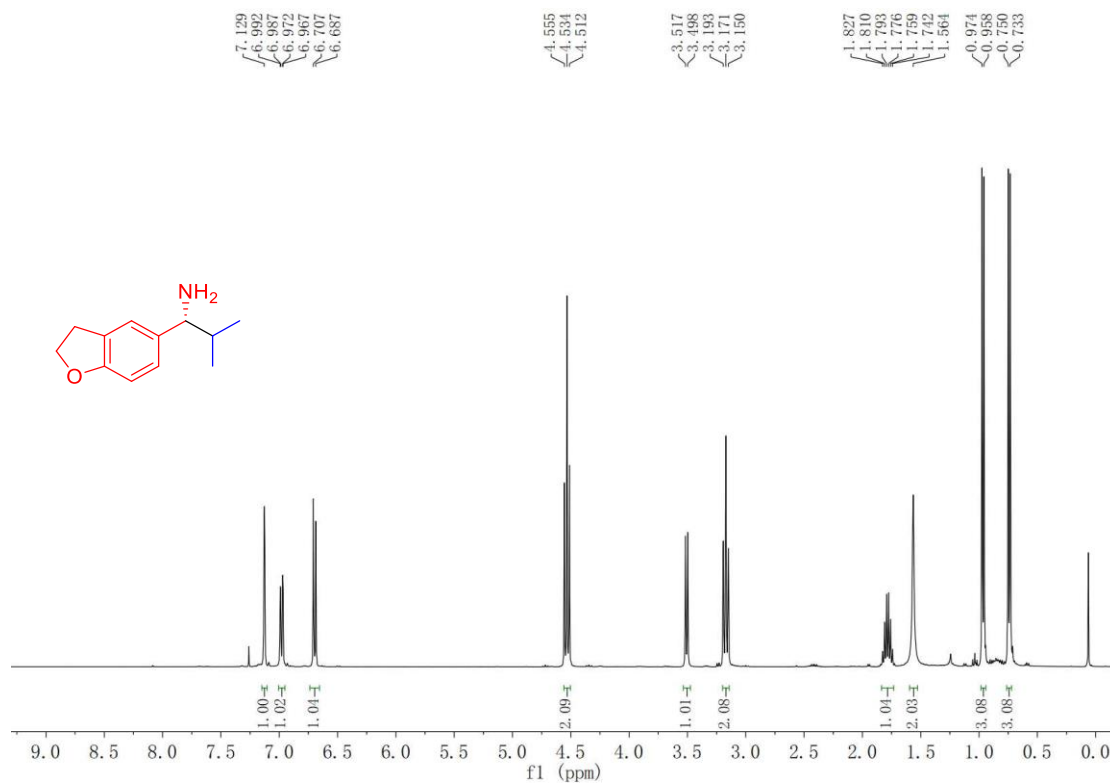

Figure S137. <sup>13</sup>C{<sup>1</sup>H} NMR spectra (100 MHz, Chloroform-*d*) of (*R*)-1-(2,3-Dihydrobenzofuran-5-yl)-2-methylpropan-1-amine (6la).

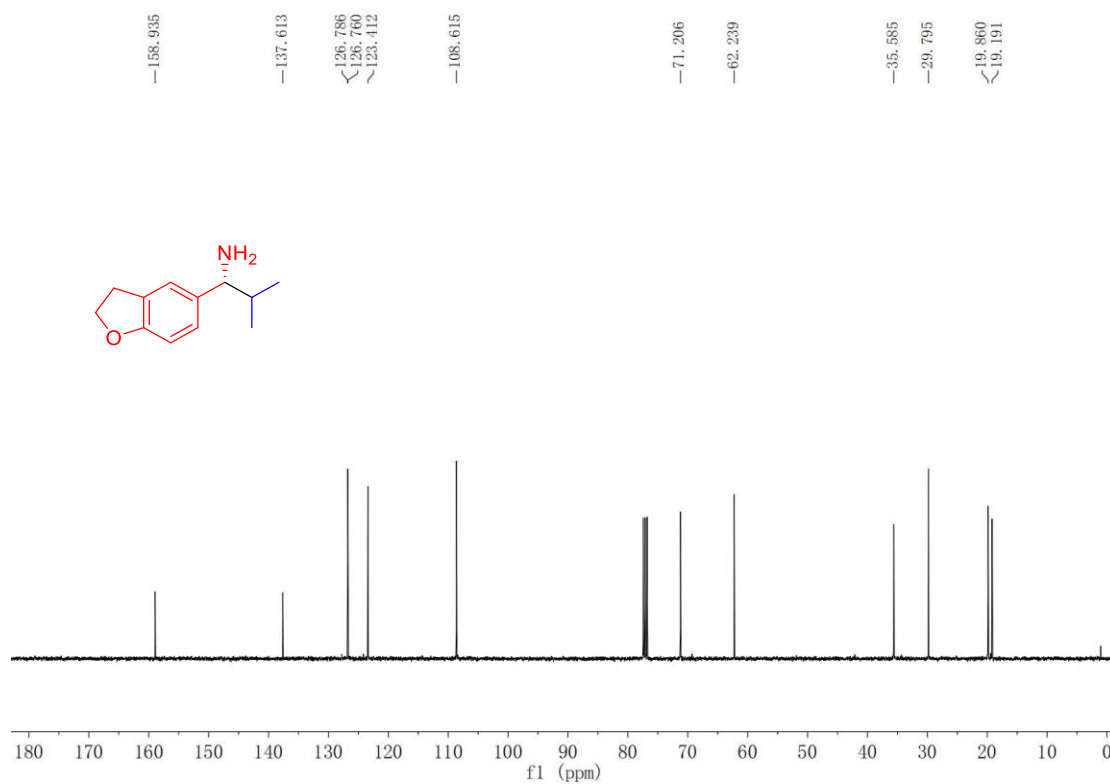

Figure S138. HPLC Chromatography of (*R*)-1-(2,3-Dihydrobenzofuran-5-yl)-2-methylpropan-1-amine (6la).

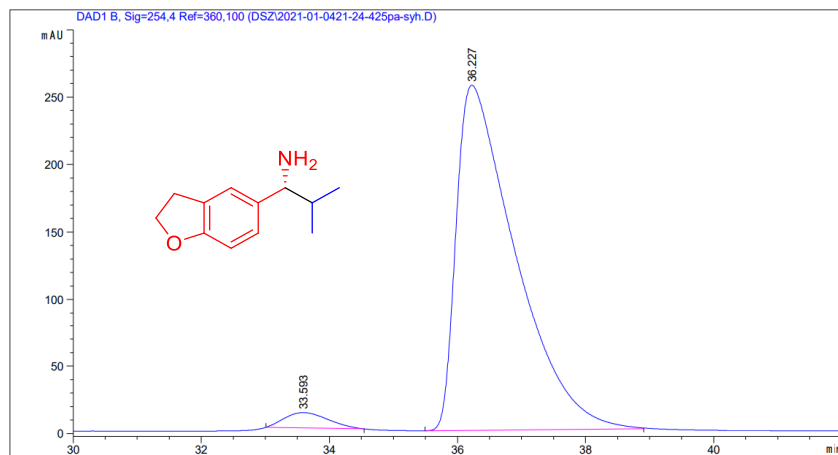

Signal 1: DAD1 B, Sig=254,4 Ref=360,100

| Peak #   | RetTime [min] | Type | Width [min] | Area [mAU*s] | Height [mAU] | Area %  |
|----------|---------------|------|-------------|--------------|--------------|---------|
| 1        | 33.593        | HHA  | 0.7506      | 535.47443    | 11.34589     | 3.1494  |
| 2        | 36.227        | HHA  | 0.9333      | 1.64672e4    | 256.41229    | 96.8506 |
| Totals : |               |      |             | 1.70026e4    | 267.75818    |         |
